1 Hsa-miR-31-5p controls a metabolic switch in psoriatic keratinocytes that  
2 identifies therapeutic intervention

3  
4  
5 Mao-Jie Wang<sup>1,2,3</sup>, Yong-Yue Xu<sup>1</sup>, HarmJan Vos<sup>2</sup>, Can Gulersonmez<sup>2</sup>, Edwin  
6 Stigter<sup>2</sup>, Johan Gerritsen<sup>4</sup>, Marc Pages Gallego<sup>5</sup>, Robert van Es<sup>2</sup>, Li Li<sup>1</sup>, Hao Deng<sup>1</sup>,  
7 Ling Han<sup>1</sup>, Run-Yue Huang<sup>1,3,#</sup>, Chuan-Jian Lu<sup>1,3,#</sup>, Boudewijn MT Burgering<sup>2,#</sup>  
8

9 1. The Second Affiliated Hospital, Guangzhou University of Chinese Medicine  
10 (Guangdong Provincial Hospital of Chinese Medicine), Guangzhou, China.

11 2. Oncode Institute and Molecular Cancer Research, Center for Molecular Medicine,  
12 University Medical Center Utrecht, Utrecht, The Netherlands.

13 3. Guangdong Provincial Key Laboratory of Clinical Research on Traditional Chinese  
14 Medicine Syndrome, Guangzhou, China

15 4 Metabolic Diagnostics, Department of Biomedical Genetics, Centre for Molecular  
16 Medicine, University Medical Centre Utrecht, Utrecht, The Netherlands.

17 5. Oncode Institute and Department of Genetics, Center for Molecular Medicine,  
18 University Medical Center Utrecht, Utrecht, The Netherlands.

19  
20 # corresponding authors

21 email: Run-Yue Huang: ryhuang@gzucm.edu.cn

22 Chuan-Jian Lu: lcj@gzucm.edu.cn

23 Boudewijn MT Burgering: b.m.t.burgering@umcutrecht.nl  
24

25 Lead contact: Boudewijn MT Burgering: b.m.t.burgering@umcutrecht.nl  
26

27 **Author contribution**

28 M-JW and BMTB conceptualized and co-wrote manuscript, analyzed and discussed  
29 data

30 HJV and RvE performed proteomics analysis

31 CG,ES,LL and JG performed metabolomics and metabolomic flux analysis

32 MPG performed bioinformatic analysis on different data sets

33 M-JW, R-YH, C-JL and BMTB initiated the study, discussed progress and designed  
34 animal experiments

35 Y-YX, HD, LH performed immunohistochemistry and in situ hybridization  
36  
37  
38

39 **Abstract**

40 Psoriasis is characterized by a combination of keratinocyte hyperproliferation and  
41 immune cell activation. Immune cell activation requires increased glucose  
42 consumption, consequently limiting glucose availability for other cell types like  
43 keratinocytes. In psoriasis Hsa-microRNA-31-5p (miR-31) is highly expressed in  
44 keratinocytes. Here we show that miR-31 expression in keratinocytes is induced by  
45 limited glucose availability and increases survival under limiting glucose conditions,  
46 by increasing glutamine metabolism. In addition, miR-31 induced glutamine  
47 metabolism results in secretion of specific metabolites (aspartate and glutamate) but  
48 also immuno-modulatory factors. We show that this miR-31-induced secretory  
49 phenotype is sufficient to induce Th17 cell differentiation, a hallmark of psoriasis.  
50 Inhibition of glutaminase (GLS) using CB-839 impedes miR31-induced metabolic  
51 rewiring and secretion of immuno-modulatory factors. Concordantly, pharmacological  
52 targeting of GLS alleviated psoriasis pathology in a mouse model of psoriasis.  
53 Together our data illustrate an emerging concept of metabolic interaction across cell  
54 compartments that characterizes disease development, which can be employed to  
55 design effective treatment options for disease, as shown here for psoriasis.

56  
57 **Introduction**

58 Psoriasis is a chronic immune-mediated disorder of the skin that affects 0.1-0.4% of  
59 the total world population and is typically characterized by scaly, erythematous  
60 plaques on the extensor surfaces (Armstrong & Read, 2020; Parisi *et al*, 2020). The  
61 disease causes a negative impact on quality of life and is associated with additional  
62 pathologies, such as arthritis, cardiovascular disease and metabolic syndrome  
63 (Parisi *et al.*, 2020). The pathogenesis is characterized by a combination of  
64 keratinocyte hyperproliferation and inflammation mediated by activated immune cells,  
65 including neutrophils, dendritic cells and Th17 cells (Greb *et al*, 2016).  
66 Human disease, like psoriasis, is prevented by intrinsic and extrinsic control  
67 mechanisms that will remove aberrant cells before these can survive and establish a  
68 stable altered cellular compartment. To evade these control mechanisms aberrant  
69 cells may adopt various strategies. A well-studied example being the various  
70 mechanisms by which cancer cells prevent clearance by the immune system.  
71 Immune cell activation oftentimes requires a shift in T-cell metabolism towards  
72 glycolysis and hence increased glucose consumption. Cancer cells are similarly  
73 dependent on increased glucose consumption to sustain proliferation (Warburg  
74 effect) and cancer cells have been suggested to outcompete immune cells for  
75 glucose availability and thereby establish immune suppression (Garcia-Bermudez *et*  
76 *al*, 2018).  
77 Importantly, in inflammatory skin diseases like psoriasis the activated T-cells display  
78 a high glycolytic demand and consequently in these diseases T-cells may likely  
79 outcompete other cell types of glucose. However, in certain skin diseases  
80 inflammation co-occurs with increased proliferation of skin cells, mostly keratinocytes.  
81 Apparently, keratinocytes have to adopt a metabolic switch that enables them to  
82 proliferate without competing for the metabolic resources that are essential to fuel  
83 immune cell differentiation and activation resulting in inflammation. Cellular  
84 adaptation oftentimes requires changes in gene expression programs and these can  
85 be brought about through epigenetic changes, but also by expression of microRNAs  
86 (miRNAs), noncoding RNAs of 21–25 nucleotides that can regulate mRNA and  
87 consequent protein expression of hundreds of genes simultaneously.

88 A number of miRNAs have been implicated in psoriasis pathology (Joyce *et al*, 2011),  
89 including microRNA-31-5p (miR-31(Wang *et al*, 2019; Xu *et al*, 2013)). Interestingly,  
90 miR-31 expression is also implicated in various types of cancer (reviewed in (Laurila  
91 & Kallioniemi, 2013; Valastyan & Weinberg, 2010)) and appears therefore  
92 associated in general with increased proliferation. Therefore, we chose to study the  
93 role of miR-31 in psoriasis pathology and in order to obtain a more integrated view  
94 on miR-31 function and regulation of keratinocyte proliferation, we used a  
95 combination of proteomics and metabolomics and focused on the regulation of  
96 metabolic processes by miR-31.

97 Interestingly, we find that miR-31 expression impacts on glutamine metabolism at  
98 several levels. Glutamine through reductive or oxidative metabolism can provide  
99 cells with the majority of building blocks and efficiently maintain cell viability even in  
100 the absence of glucose (Altman *et al*, 2016). In agreement, miR-31 expression in  
101 keratinocytes enables survival and proliferation of keratinocytes under limiting  
102 glucose conditions by switching to glutamine dependent metabolism. Interestingly,  
103 miR-31 expression itself is induced by limiting glucose availability, suggesting that  
104 increased glucose consumption by T-cells triggers miR-31 expression in  
105 keratinocytes in psoriasis. This reciprocal interaction is further enforced by our  
106 observation that miR-31 expression results in glutamine-dependent secretion of  
107 metabolites and cytokines that enable Th17 differentiation. Consequently, breaking  
108 the cross-talk between T-cells and keratinocytes by inhibiting glutaminase (GLS) a  
109 key enzyme in glutamine metabolism, alleviates psoriasis in a mouse model. Taken  
110 together our results illustrate how the extracellular environment can be involved in  
111 disease progression and how this knowledge may be employed to tailor treatment.

112  
113

## 114 **Results**

115 First, we confirmed increased miR-31 expression in psoriasis by comparing skin  
116 biopsies from healthy control and psoriatic patients (Fig. 1a). We observed similar  
117 increase in miR-31 expression in publicly available data (Extended data Fig. 1a) and  
118 in the imiquimod (IMQ)-induced mouse model for psoriasiform hyperplasia(van der  
119 Fits *et al*, 2009) (Fig. 1a). Potential target mRNAs have been identified for miR-31  
120 (reviewed in (Laurila & Kallioniemi, 2013)), yet mostly these proposed targets have  
121 been studied on an individual basis, whereas a specific miRNA can target  
122 simultaneously up to a few hundred of different mRNA species and thus a  
123 simultaneous change in the expression of many proteins. Importantly, this indicates  
124 that miRNAs regulate biology in a systemic rather than singular manner. To study  
125 the full spectrum of miRNA-31-induced protein deregulation we made use of a  
126 quantitative proteomic strategy (SILAC, Extended data Fig. 1b). Ectopic miR-31  
127 expression in two different human cell lines, 293T and the keratinocyte cell line  
128 HaCAT, induced extensive changes in protein levels (Extended data Fig. 1c).  
129 Pearson correlation indicated a high concordance between SILAC proteome results  
130 obtained with these cell lines ( $R^2=0.449$ ,  $p<0.001$ , Extended data Fig. 1d) and a  
131 significant overlap in both cell lines of down regulated (279) and upregulated (187)  
132 proteins (Fig. 1b). To further evaluate the quality of our proteomics results we  
133 selected a set of validated miR-31 targets (meaning a target that at least is validated  
134 by reporter assay, western blot, or qPCR according miRTarBase database  
135 (<http://mirtarbase.mbc.nctu.edu.tw/>), Extended table 1). Comparison with our results  
136 confirmed regulation of several of these validated miR-31 targets in both cell lines  
137 (e.g., Hypoxia Inducing Factor1 alpha inhibitor (HIFAN), Forkhead box-O

138 transcription factor 3 (FOXO3), NUMB-endocytic adaptor protein (NUMB), AT-rich  
139 interaction domain 1A (ARID1A) (Extended data Fig. 1e). Next, we checked our data  
140 for expression of 301 metabolic genes and 137 of these were detected in all  
141 replicates. When compiling these data, we identified 15 high confidence hits for  
142 metabolic proteins downregulated following miR-31 expression. Importantly, a  
143 majority of downregulated metabolic genes (13/15) harbour at least one miR-31 seed  
144 sequence (Fig. 1c, Extended table 2).

145 As miR-31 expression resulted in significant metabolic protein expression changes  
146 we next performed targeted analysis of the cellular metabolome using Hydrophilic  
147 Interaction Chromatography - Mass Spectrometry (HILIC-MS) to obtain an unbiased  
148 view on metabolic changes induced by miR-31 expression. Principal component  
149 analysis (PCA, Extended data Fig. 1f) and heatmap clustering (Fig. 1d, Extended  
150 table 3) showed a clear separation in metabolite expression profiles between HaCAT  
151 cells expressing miR-31 or a scrambled miRNA mimic. Importantly, we observed  
152 metabolite changes to corroborate protein expression changes. For example, in  
153 agreement with downregulation of ribose 5-phosphate isomerase A (RPIA) at the  
154 protein level and its role in the Pentose Phosphate Pathway (PPP), we observed a  
155 reduced level of PPP intermediates (Ribulose-5P, Glucose-6P, Seduheptulose-7P).  
156 Also changes in glutamine/glutamate levels are consistent with the observed  
157 downregulation of Glutamine synthetase (GS) in the proteome analysis. Pathway  
158 GO-term analysis using metabolite levels as input also indicated extensive miR-31  
159 induced deregulation of glucose and glutamine metabolism (Extended data Fig. 1g)  
160 Combined the proteomic and metabolic data indicate that miR-31 expression,  
161 through simultaneous deregulation of the expression of multiple metabolic genes,  
162 may impact glycolytic, lipid and amino acid metabolism (summarized in Fig. 1e) and  
163 deregulated gene expression appears to correlate by and large with changes in  
164 metabolite levels.

165

### 166 **Regulation of glucose metabolism by miR-31**

167 We next explored in detail how miR-31 expression regulates the above identified  
168 metabolic pathways. To analyse the role of miR-31 expression in glucose  
169 metabolism (Fig. 2a), we first measured uptake of the fluorescent glucose compound  
170 2-[N-(7-nitrobenz-2-oxa-1,3-diazol-4-yl)amino]-2-deoxyglucose (2-NBDG) as a proxy  
171 for glucose uptake (Extended data Fig. 2a) and observed on average a reduction of  
172 2-NBDG uptake of 20%-30% after ectopic miR-31 expression (Fig. 2b) This  
173 reduction was observed for several cell lines including 2 additional keratinocyte cell  
174 lines (CCD-1106(Hsieh *et al*, 2014) and CCD-1102KERTr). Expressing an anti-miR  
175 for miR-31 did not, or only mildly increase 2-NBDG fluorescence (Fig. 2b) possibly  
176 reflecting a low level of endogenous miR-31 expression. Furthermore, miR-31-  
177 induced reduction of 2-NBDG fluorescence was independent of glucose  
178 concentration (Extended data Fig. 2b) and also growth factor-induced 2-NBDG  
179 fluorescence was reduced to similar extent (Extended data Fig. 2c). These findings  
180 are consistent with miR-31 repressing glucose uptake. In keratinocytes GLUT-1 acts  
181 as the major glucose transporter(Zhang *et al*, 2018) and our proteomics data showed  
182 reduced expression of GLUT-1 despite lacking an obvious miR-31 seed sequence in  
183 the 3'UTR. We confirmed reduced GLUT-1 expression following miR-31 expression  
184 by immune fluorescence microscopy (Extended data Fig. 2d). GLUT-1 is a low Km  
185 and ATP-independent glucose transporter and hexokinase (HK) mediated glucose-6-  
186 phosphate formation is the rate limiting step for glucose utilization(Ishihara *et al*,  
187 1994). We observed miR-31 induced reduction in mRNA expression of HK1 and HK2

188 (Fig. 2c) and this corroborates the observed reduction in glucose-6-Phosphate (Fig.  
189 1d). In addition, expression of all three Phospho-Fructose Kinase isozymes is  
190 reduced upon miR-31 expression (PFKM, PFKL, PFKP (Fig. 2c). Combined with the  
191 reduced expression of Aldolase (ALDOC, Fig. 1c) this suggests that miR-31  
192 expression reduced glucose uptake also results in decreased levels of glycolytic  
193 intermediates and possibly reduced glycolysis. However, when measuring  
194 extracellular acidification rate under normal culture conditions using Seahorse  
195 technology, we do not observe a significant miR-31 induced change in lactate  
196 production (Fig. 2d). Importantly, under limiting glucose conditions, miR-31  
197 expression significantly enhanced lactate production upon glucose addition (Fig. 2e  
198 upper panel). Our SILAC data indicate that miR-31 expression also reduced  
199 Pyruvate dehydrogenase complex member X (PDHX) and Pyruvate Carboxylase  
200 (PC) expression (Fig. 1c) and this was confirmed by western blotting (Fig. 2f). Both  
201 enzymes regulate entry of pyruvate into the mitochondria and therefore decreased  
202 expression may divert pyruvate flux towards lactate. In agreement, under low  
203 glucose conditions similar to miR-31 expression, pharmacological inhibition of  
204 pyruvate entry by UK-5099 a potent inhibitor of the mitochondrial pyruvate carrier  
205 (MPC1, Fig. 2g upper panel) as well as siRNA-mediated knockdown of PC increased  
206 glycolytic flux towards lactate after glucose addition (Fig. 2h upper panel). This  
207 suggests that miR-31 despite reducing glucose uptake maintains glycolytic flux  
208 towards lactate by reducing pyruvate entry into mitochondria.  
209 Alongside with increasing lactate production following glucose stimulation, miR-31  
210 expression increased basal mitochondrial O<sub>2</sub> consumption in the absence of  
211 glucose, yet this was not further increased by glucose addition. Importantly, this  
212 result is identical to UK-5099 mediated MPC inhibition (Fig. 2g lower panel) and  
213 siRNA-mediated knockdown of PC showed a similar trend (Fig. 2h lower panel). The  
214 latter is in agreement with the study of Cheng *et al.* showing that PC levels and  
215 activity regulate the choice between glucose and glutamine-mediated  
216 anaplerosis (Cheng *et al.*, 2011), whereby reduced PC increases glutamine-  
217 dependent anaplerosis. Taken together, miR-31 expression reduced glycolytic flux  
218 towards mitochondrial metabolism, whilst upholding lactate production, and miR-31  
219 induced an increase in mitochondrial O<sub>2</sub> consumption. These results thus suggest  
220 that miR-31 induces mitochondrial activity through alternative sources, like glutamine  
221 metabolism.

222

### 223 **Regulation of glutamine metabolism by miR-31**

224 Our proteomic analysis (Fig. 1c) showed a strong downregulation of glutamine  
225 synthase (GS) following miR-31 expression making GS a prime target in mediating  
226 possible miR-31-induced glutamine-dependent anaplerosis (schematic  
227 representation Fig. 3a). Reduced GS expression induced by miR-31 was confirmed  
228 by immunoblotting (Fig. 3b). In addition, to GS regulation, we also observed a small  
229 increase in expression of glutamate-oxaloacetic transaminase (GOT1) and the  
230 mitochondrial aspartate/glutamate transporter (AGC1/SLC25A12) (Fig. 3b).  
231 Consequently, miR-31 expression increased glutamine uptake and apparently  
232 resulting in a surplus of glutamate production as we observed profound glutamate  
233 secretion (Fig. 3c). Glutamine to glutamate conversion requires glutaminase (GLS)  
234 and CB-839 is a specific pharmacological inhibitor of GLS. Inhibition of GLS reduced  
235 glutamine uptake but did not inhibit miR-31 induced increase, but fully inhibited  
236 glutamate secretion in the presence or absence of miR-31 (Fig. 3c). Glutamate can  
237 be exported through various transporters including the cystine-glutamate antiporter

238 (xCT), a heterodimer consisting of SLC7A11 and SLC3A2. miR-31 enhances mRNA  
239 expression of both components (Extended data Fig. 3a). However, cystine uptake is  
240 only slightly increased by miR-31. This may suggest that additional glutamate  
241 transporters are being used (e.g., SLC1A3 or SLC1A4) and that usage of the xCT  
242 antiporter is determined by conversion of glutamate to glutathione and that the  
243 observed miR-31 induced reduction in glutamate-cysteine ligase modifier (GCLM,  
244 Fig. 1c) constrains cystine uptake. Next, we tested a role for miR-31 in glutamine-  
245 dependent anaplerosis under low glucose condition. As shown, miR-31 expression  
246 increased mitochondrial oxygen consumption under low glucose conditions and this  
247 was dependent on extracellular glutamine (Fig. 3d). Glutamate cannot replace  
248 glutamine in supporting miR-31 dependent mitochondrial metabolism (Extended data  
249 Fig. 3b) or miR-31 induced lactate production. Furthermore, the miR-31-induced  
250 increase in both mitochondrial metabolism and lactate production was inhibited by  
251 CB-839 treatment (Fig. 3e). Substrate supply for OXPHOS is controlled in many  
252 ways and the Malate/Aspartate (MAS) shunt plays a role by regulating pyruvate  
253 supply and the NAD/NADH balance between cytosol and mitochondria. Increased  
254 expression of AGC1/SLC25A12 and GOT1 following miR-31 expression suggests  
255 also a key role for MAS in miR-31 induced mitochondrial metabolism and lactate  
256 production. Indeed, AGC1/SLC25A12 knockdown reduced miR-31 driven  
257 mitochondrial metabolism and lactate production (Fig. 3f). Combined these results  
258 indicate that miR-31 stimulates anaplerosis through oxidative glutaminolysis and  
259 stimulates aspartate transport to the cytosol to generate pyruvate.

260 To further corroborate our observations, we performed <sup>15</sup>N,<sup>13</sup>C-glutamine tracing  
261 (Fig. 3g). As we predominantly observe miR-31 to stimulate glutaminolysis under low  
262 glucose conditions (Fig. 3d) we performed tracing under glucose-free conditions and  
263 added low amount of unlabelled glutamine to prevent cell death before adding tracer  
264 glutamine. This resulted in rapid (within 30 minutes) labelling of most metabolites. In  
265 agreement with lactate production being maintained by miR-31 (Fig 2d) we observed  
266 that miR-31 increased lactate labeling derived from glutamine (Fig 3h), indicating  
267 that lactate production is the consequence of a combination of increased  
268 glutaminolysis and reduced pyruvate entry into mitochondria. We observed  
269 additional miR-31 induced increase in cellular malate and fumarate labelling showing  
270 miR-31 induced anaplerosis of the TCA cycle. More strikingly, we observed a strong  
271 increase in miR-31 induced secretion of not only glutamate but also aspartate,  
272 oxaloacetate and to lesser extend malate and fumarate. Glutamate and aspartate  
273 secretion following miR-31 expression was independently confirmed using a LC-MS  
274 platform for analysis of biogenic amines (Fig. 3i). These results combined suggest  
275 that miR-31 expression results in increased glutamine to glutamate conversion by  
276 inhibiting GS, however the fate of glutamate is determined by miR-31 dependent  
277 regulation of other metabolic enzymes like PC/PDHX and GCLM/AGC1. Together  
278 this results in miR-31 facilitated glutamine-dependent anaplerosis under glucose  
279 limiting conditions and this produces aspartate, but also that a significant part of the  
280 metabolites (aspartate, glutamate but also oxalo-acetate) is secreted (schematic  
281 representation Extended data Fig. 3c).

282 To determine whether indeed next to GS regulation, the regulation of these other  
283 miR-31 targets is required to determine its metabolic phenotype we addressed  
284 whether reduced GS expression by itself is sufficient to mimic miR-31 expression in  
285 regulating glutaminolysis. Interestingly, siRNA-mediated reduction in GS expression,  
286 similar to miR-31 expression, also decreased glucose uptake (Fig. 3j), whereas  
287 reducing expression of PC did not affect glucose uptake. In contrast to miR-31

288 expression, siRNA mediated knockdown of GS resulted in decreased glycolysis  
289 towards lactate and also decreased mitochondrial metabolism (Fig. 3k). As individual  
290 regulation of these miR-31 targets does not phenocopy miR-31 induced metabolism,  
291 these results strongly imply that the mechanism whereby miR-31 couples glucose  
292 and glutamine metabolism results from combined miR-31-dependent regulation of  
293 GS with PC/PDHx and GCLM/AGC1.

294

### 295 **Consequence of metabolic regulation on proliferation and inflammation**

296 Psoriasis and comparable skin diseases emerge through a combination of  
297 hyperproliferative keratinocytes and local inflammation. To test consequences of  
298 metabolic rewiring by miR-31 expression on disease parameters we first tested cell  
299 growth of HaCAT cells under limiting glucose or glutamine conditions. Under normal  
300 culture conditions miR-31 expression did not affect cell proliferation, but miR-31  
301 expression reduced cell proliferation under glutamine restricted conditions and in  
302 contrast enhanced cell proliferation under glucose limiting conditions (Fig. 4a).  
303 Mechanistically, these effects on cell proliferation can be explained by miR-31  
304 induced reduction of GS and consequent enhanced glutaminolysis, but also by  
305 reduced PC expression following miR-31 expression, which renders cells more  
306 dependent on glutamine for anaplerosis(Cheng *et al.*, 2011). In contrast, siRNA-  
307 mediated reduction of GLS expression or pharmacological inhibition by CB-839  
308 makes cells dependent on glucose for anaplerosis(Cheng *et al.*, 2011). In  
309 agreement, we observed synthetic lethality in HaCAT cells between miR-31  
310 expression and CB-839 treatment, whereas anti-miR-31 expression, increased  
311 survival after CB-839 treatment (Fig. 4b and Extended data 4a). This GLS  
312 dependence of miR-31 expressing cells further corroborates that upon miR-31  
313 expression cells move from endogenous glutamine production to exogenous  
314 glutamine uptake as a source of glutamine.

315 As the miR-31 effect on cell proliferation is dependent on the consequent metabolic  
316 changes we addressed whether metabolic changes in reverse affect miR-31  
317 expression and interestingly, we observed that glucose restriction by itself induces  
318 expression of miR-31 (Fig. 4c) and also reduced GS expression (Fig. 4d). Together  
319 this suggests that glucose availability can couple in an inverse manner to  
320 glutaminolysis through regulating expression of miR-31 and consequent expression  
321 of GS and other miR-31 targets.

322 Crosstalk between keratinocytes and immune cells mediated by cytokines is  
323 important in maintaining the diseased state (reviewed in (Lowes *et al.*, 2014)).  
324 Previous studies(Xu *et al.*, 2013; Yan *et al.*, 2015) identified miR-31 as a pro-  
325 inflammatory factor in psoriasis, showing that miR-31 activated the NF-kB pathway  
326 and thereby increased secretion of a set of cytokines. Therefore, we next determined  
327 a possible role for miR-31 induced metabolism in the expression of mediators of the  
328 inflammatory response in HaCAT cells. Expression of miR-31 by itself induced  
329 expression of various cytokines most notably in the context of psoriasis IL-17 and  
330 IL1b (Fig. 4e, Extended table 4). Anti-IL17 treatment is currently used for psoriasis  
331 treatment and interestingly expression of IL-17, IL1b, and other, but not all cytokines  
332 were inhibited by CB-839 treatment. Thus, glutamine metabolism mediates in part  
333 miR-31 induced regulation of these cytokines. Interestingly CB-839 treatment also  
334 enhanced expression of some of the miR-31 induced cytokines and this may indicate  
335 that these are sensitive to glycolytic metabolism. In psoriasis TNF $\alpha$  is an important  
336 inflammatory cytokine and NF-kB activator and in HaCAT cells a subset of TNF $\alpha$ -  
337 induced cytokines overlaps with those regulated by miR-31, most importantly in the

338 context of psoriasis TGF $\beta$  and IL1 $\beta$  (Fig. 4f, Extended table 5). Most notably, TNF $\alpha$ -  
339 induced expression of these and some others is sensitive to CB-839 treatment  
340 indicating the relevance of miR-31 controlled glutamine metabolism in the  
341 inflammatory control of psoriasis.

342

### 343 **MiR-31 induced secretome induces Th17 differentiation**

344 The above defines a miR-31 induced secretome that combines specific metabolites  
345 as well as cytokines and partially depends on the regulation of glutamine metabolism  
346 by miR-31. To test a functional consequence of the miR-31 induced secretome we  
347 tested differentiation of naive T-cells towards Th17 cells, as this T-cell subtype  
348 specifically marks psoriasis.

349 Naive T-cells were treated with different cytokines and we observed that combined  
350 with TGF $\beta$ 1 both IL-6 and IL-21 induce Th17 differentiation and importantly this can  
351 be further increased by adding aspartate to the medium whereas glutamate did not  
352 induce additional differentiation. Recently, it has been shown that glutaminolysis in  
353 mice stimulates Th17 differentiation (Johnson *et al*, 2018; Kono *et al*, 2018) and  
354 therefore the latter result was unexpected. However, high extracellular glutamate,  
355 inhibits cystine uptake by the cystine/glutamate antiporter (system xCT (Dixon *et al*,  
356 2012) and consequently results in increased levels of ROS, that even impair Th17  
357 formation (Johnson *et al*, 2018). In this respect glutamate may not simply replace  
358 glutamine.

359 Taken together these results indicate that miR-31 expression in keratinocytes also  
360 supports in part the inflammatory response by stimulating Th17 differentiation.

361

### 362 **Role for miR-31-induced metabolic regulation in psoriasis**

363 Nutrient availability is likely not homogenous in the skin, with only the basal layer  
364 being adjacent to blood vessels and upper layers therefore relatively devoid of  
365 nutrients. This would be exaggerated during skin diseases characterized by  
366 keratinocyte hyperproliferation. We used immunohistochemistry to study whether the  
367 miR-31-mediated switch to glutaminolysis and its effect on cell proliferation under  
368 glucose limiting conditions in vitro is relevant to psoriasis.

369 The biopsies of psoriasis patients used for IHC show typical epidermal thickening  
370 (Fig. 5a) increased proliferation (Ki67 staining, Fig. 5b) and displayed increased miR-  
371 31 expression specifically in the spinous layer (Fig. 5c). Next, we tested expression  
372 GLUT-1, GLS and GS (Fig. 5d). In normal skin GLUT-1 expression appears mostly  
373 restricted to cells present in the basal layer and expression is lost when cells are  
374 moving upwards into the spinous and granular layer. Also, in psoriatic lesions from  
375 human patients GLUT-1 expression appears mostly restricted to cells in the basal  
376 layer and strongly reduced in the upper layers (Fig. 5d for quantification see  
377 Extended data Fig. 5a). In contrast to GLUT-1, GLS staining is high in all cell layers  
378 both in normal skin as well as in psoriatic skin. GS expression was low in normal skin  
379 but increased in cells of the basal layer of the skin in psoriatic lesions. However, in  
380 psoriatic lesions GS expression was decreased in the spinous and granular layer  
381 concordant with miR-31 regulating GS and expression of miR-31 being low in the  
382 basal layer as compared to an increase in the spinous and granular layer. Taken  
383 together these data suggest that the skin displays metabolic compartments whereby  
384 the basal layer is GLUT-1 positive and the upper layers are GLUT-1 negative, but  
385 GLS positive (Fig. 5e).

386 To address causality, we made use of the IMQ mouse model for psoriasis. The IMQ  
387 model employed, similar to human patients, showed increased scaling (Extended



388 data Fig. 5b) and a gradual increase in epidermal thickness (Extended data Fig. 5c),  
389 but also an increase in miR-31 expression in the spinous layer (Fig. 5f). Also, the  
390 pattern of GLS and GLUT-1 expression in this model reflected human disease  
391 (Extended data Fig. 5d). As we observed in cell culture synthetic lethality between  
392 miR-31 expression and GLS inhibition by CB-839, we tested the effect of CB-839  
393 treatment in this model for psoriasis. Cutaneous application of CB-839 was  
394 compared to treatment with Calcipotriol and Betamethasone Dipropionate Gel (CBG,  
395 commercial name Xamiol), a commonly used treatment option for psoriasis(Kuehl &  
396 Shear, 2018). CB-839 treatment decreased epidermal thickness, decreased  
397 keratinocyte proliferation as measured by Ki67 staining and lowered the  
398 histopathological score based on baker's system (Fig. 5g). Furthermore, we  
399 observed a significant reduction in the number of capillary vessels (Extended data  
400 Fig. 5e), following CB-839 treatment. In line with a role for glutamine metabolism  
401 regulating cytokine production by keratinocytes (Fig. 4e-4f) we also observed a  
402 reduction in CD4+ T-cells and Myeloperoxidase positive (MPO+ cells; neutrophil  
403 granulocytes) indicating reduced inflammatory response (Fig. 5h).  
404 Taken together CB-839 showed similar or better therapeutic effect compared to  
405 CBG/Xamiol in alleviating psoriatic symptoms in the IMQ model. Importantly, IHC  
406 analysis showed that both CB-839 and CBG/Xamiol treatment in the IMQ model  
407 also partially normalized the expression pattern of GLUT-1, GLS and GS (Extended  
408 data Fig. 5f).

409

## 410 Discussion

411 Psoriasis is one of the most common human skin diseases characterized by  
412 excessive growth and aberrant differentiation of keratinocytes combined with a  
413 strong local inflammatory immune response. Many studies have addressed the  
414 genetic underpinning of psoriasis including the expression and potential role of  
415 aberrant miRNA expression. Here we confirm high miR-31 expression in human  
416 biopsies of psoriasis and in the IMQ mouse model system for psoriasis. We present  
417 evidence that miR-31 expression induces metabolic rewiring through a combined  
418 deregulation of enzymes involved in glycolysis, glutaminolysis and lipid metabolism.  
419 We observed that miR-31 expression limits glucose flux towards mitochondrial  
420 metabolism whereas it upholds lactate production and increases mitochondrial  
421 respiration. Lactate production is maintained in part by reducing pyruvate entry into  
422 mitochondria through reduced PC and PDHX expression and in part through  
423 increased glutaminolysis, which also maintains mitochondrial respiration. miR-31  
424 regulation of glutaminolysis occurs at multiple levels. Primarily, expression of miR-31  
425 reduced GS expression resulting in increased glutamine uptake and excess  
426 glutamate. Subsequently, miR-31 expression steers glutamate metabolism through  
427 the combined regulation of several metabolic enzymes/pathways. First, miR-31  
428 expression increased glutamate secretion by regulation of the xCT antiporter  
429 (increased expression of SLC7A11 and SLC3A2), likely in combination with  
430 downregulation of GCLM. Further, glutamate metabolism is determined by miR-31  
431 dependent regulation of the mitochondrial Malate-Aspartate shuttle (MAS).  
432 Interestingly we observed regulation of GOT1, MDH1, ME1 and SLC25A12 as  
433 compared to GOT2, MDH2, ME2 and SLC25A11, indicating that glutamine-directed  
434 anaplerosis of the TCA cycle additionally results in MAS-dependent secretion of  
435 aspartate and oxaloacetate into the cytosol and this is corroborated with the  
436 observed increase in these metabolites when measuring flux under glucos limiting  
437 conditions (see for schematic overview Extended data Fig. 3c). Importantly, the

438 mode of miR-31 dependent regulation of glutaminolysis allows cell survival under  
439 glucose limiting conditions.

440 Inhibition of glutaminolysis by CB-839 treatment mitigates most of the effects of miR-  
441 31 on glutamine metabolism suggesting that miR-31 redirects cells from endogenous  
442 glutamine production to exogenous glutamine uptake as a source of glutamine.

443 In keeping, with our results showing differential expression of miR-31 and GLS/GS  
444 within the layers of healthy and psoriatic skin, we find that CB-839 treatment is  
445 effective in alleviating psoriatic disease in the IMQ mouse model.

446 Many studies have reported a possible correlation between metabolic syndrome,  
447 diabetes and the incidence of skin disease such as psoriasis. However, a recent  
448 meta-analysis covering 26 clinical studies concluded that there is no clear support to  
449 suggest a link between defective glucose metabolism and psoriasis(Friis *et al*, 2019).  
450 In contrast others(Zhang *et al.*, 2018) and our results clearly provide support for the  
451 involvement of dysregulated metabolism in psoriasis, but not as a predisposition but  
452 rather as part of the mechanism that drives the disease when manifest.

453 Our results identify inhibition of glutaminolysis as a treatment opportunity for  
454 psoriasis. Currently, various psoriasis treatment regimens are available. Most  
455 recently, these are drugs targeting the IL-23/IL-17A pathway which are reasonably  
456 effective in relieving skin symptoms of psoriasis. However, more general treatment  
457 options such as fumarate and methotrexate are still clinically used(Mrowietz *et al*,  
458 2018; Wang & Tsai, 2017). The mode of action of fumarate and its related compound  
459 dimethyl-fumarate in relieving psoriatic symptoms remains unclear (Mrowietz *et al.*,  
460 2018). Interestingly, recently GAPDH has been suggested to be targeted by  
461 fumarate (Kornberg *et al*, 2018). In addition, GLUT-1 targeting has been proposed as  
462 treatment option for psoriasis (Zhang *et al.*, 2018). Methotrexate targeting Di-Hydro-  
463 Folate reductase (DHFR) inhibits nucleotide synthesis and thus its efficacy indicates  
464 limitations with respect to nucleotide synthesis in psoriasis. Aspartate is required for  
465 pyrimidine nucleotide metabolism and in addition has been shown to be rate limiting  
466 for proliferation under hypoxia. This corroborates our proposed role for miR-31  
467 upregulation and regulation of aspartate metabolism in driving keratinocyte  
468 proliferation in psoriatic disease.

469 In cancer, stem cells are considered the cell of origin and a recent study showed that  
470 the glutamate/aspartate transporter SCL1A3/EAAT3 marks epidermal stem  
471 cells(Reichenbach *et al*, 2018). In psoriasis, to our knowledge, a cell of origin has not  
472 been defined but, as psoriasis similar to cancer entails a disease of aberrant cell  
473 proliferation it is well conceivable that in psoriasis hyperproliferation may originate  
474 from or driven by SCL1A3 positive stem cells. This concept would be of interest as it  
475 further emphasizes the potential importance of miR-31 induced glutamate/aspartate  
476 metabolism, in the sense that miR-31 expressing keratinocytes not only affect  
477 immune cell function but may also drive stem cell function. Clearly this requires  
478 further study.

479 In humans, TH17 cell differentiation is induced by IL-1b as well as IL-23, and  
480 possibly transforming growth factor-beta (TGFb) in the presence of inflammatory  
481 cytokines such as IL-6, IL-21 and IL-23 (reviewed in (van den Berg & McInnes,  
482 2013)). Interestingly, we show that production of TGFb and IL-1b by keratinocytes  
483 depends on miR-31 expression indicating a potential role for miR-31 in instructing  
484 TH17 differentiation. In addition, recent years have shown the importance of  
485 metabolism in defining T-cell identity and function (reviewed in e.g., (Buck *et al*,  
486 2017)). In general, increased glycolysis is essential for T-cell activation and  
487 consequently proliferating cells and immune cells compete with respect to glucose

488 availability. In cancer it has been suggested that this metabolic competition is to the  
489 advantage of the proliferating cancer cells displaying a Warburg phenotype, whereby  
490 immune cells are under metabolic constraint owing to the lack of glucose to sustain  
491 their metabolism (Chang *et al.*, 2015). This constraint contributes to the lack of an  
492 endogenous immune response towards cancer. In contrast, skin disease, including  
493 psoriasis, is characterized by proliferation of keratinocytes and immune cell  
494 activation. By analogy to the aforementioned the proliferating keratinocytes are likely  
495 metabolically constrained and this maybe be exaggerated by the skin environment.  
496 GLUT-1 expression is only evident in the basal layer suggesting that glucose  
497 availability is restricted in upper dermal layers. Interestingly, we observed that  
498 decreasing glucose levels resulted in increased miR-31 expression and this is  
499 corroborated by our observation that miR-31 expression in the IMQ model is  
500 observed also in the upper dermal layers. Together this suggests that the metabolic  
501 constrain imposed by immune cell activation and the skin environment actually  
502 induces increased miR-31 expression and thereby propels keratinocyte proliferation.  
503 How glucose availability intersects with other proposed regulatory pathways of miR-  
504 31 expression (Xu *et al.*, 2013; Yan *et al.*, 2015) remains to be investigated.  
505 Nutrients and O<sub>2</sub> are provided by vasculature present below the basal layer and as  
506 such a gradient of nutrients upwards will emerge. Similar to glucose there will be  
507 limited O<sub>2</sub> available and skin hypoxia along the same line of reasoning may be an  
508 important consequence of psoriasis. Hypoxia inhibits the mitochondrial electron  
509 transport chain and thereby aspartate synthesis(Garcia-Bermudez *et al.*, 2018).  
510 Consequently, aspartate levels will decrease under low oxygen. As aspartate is an  
511 essential metabolite in nucleotide synthesis, cell proliferation can therefore only  
512 occur when aspartate levels are increased either through miR-31 expression as  
513 shown here or through import by e.g., SLC1A3.  
514 anti-IL17 therapy is highly effective in psoriasis patients indicating the importance of  
515 IL-17 dependent immune cells like Th17 and  $\gamma\delta$ T17 in psoriasis. Glutaminolysis has  
516 been reported to control Th17 differentiation in mice (ref) and in agreement herewith  
517 it has been shown that also the Th17 cells in psoriasis display increased  
518 glutaminolysis, likely through increased GLS1 expression in these cells (Johnson *et*  
519 *al.*, 2018; Kono *et al.*, 2018). Here we show that the involvement of glutamine  
520 metabolism in psoriasis acts beyond the differentiation of Th17 cells and is also part  
521 of the mechanism whereby keratinocytes contribute to this disease.  
522 Based on the requirement for glutaminolysis in Th17 differentiation, Xia *et al.* (Xia *et*  
523 *al.*, 2020) also described the potential of GLS inhibition in the treatment of psoriasis.  
524 However, there it was suggested that the effect on psoriasis was due to GLS  
525 inhibition in T cells and consequent reduced Th17 differentiation. Our results add to  
526 this suggestion and provide novel understanding of inflammatory skin disease  
527 progression (summarized in model Fig. 5i). This model illustrates a mode of  
528 metabolic co-existence in psoriasis, as opposed to metabolic competition in cancer.  
529 For the diseased state this implies that either active immune cells and proliferating  
530 cells can coevolve (psoriasis) due to differential metabolic usage or that proliferating  
531 cells outcompete activation of immune cells by metabolic competition as in the case  
532 of cancer. Finally, this model illustrates how in general cellular heterogeneity in  
533 disease combines with the metabolic environment to sustain or enable disease, but  
534 also shows that disconnecting this metabolic interaction between cell populations  
535 can be effective in treating disease as shown here for psoriasis.  
536  
537

538

539

## 540 Figure legends

541

### 542 Figure 1

543 **A. miR-31 is upregulated in human psoriasis and the IMQ mouse model.** Violin  
544 plot of qRT-PCR for miR-31-5p in skin biopsies of healthy control people (HC),  
545 psoriasis patient (Ps), control mouse (Ctrl), and imiquimod-induced psoriatic mouse  
546 model (IMQ). RUN6-1 was used as house control. n=7, \* means  $p < 0.05$ , which was  
547 calculated by Student's t-test.

548 **B. miR-31 regulation of protein expression.** The Venn diagram depicts the  
549 number proteins that were either up- or down-regulated in HaCaT cells and HEK  
550 293T cells after miR-31 expression.

551 **C. Metabolic enzymes regulated by miR-31.** Dot plot representation of log<sub>2</sub> fold  
552 changes of metabolic gene expression in HEK 293T cell (y axis) and HaCaT cell (x  
553 axis). Significantly downregulated or upregulated genes in both cell lines are circled  
554 by blue or red dashed outlines, respectively. Yellow marked genes contain at least  
555 one binding seed in 3'UTR for miR-31-5p.

556 **D. Relative metabolite levels after miR-31 expression.** Heat map representation  
557 of metabolite profile in HEK 293T cells upon miR-31 overexpression. Metabolites are  
558 grouped and marked with various colours for different metabolic pathways.

559 **E. Summary of the impact of miR-31 on cell metabolism.**

560

### 561 Figure 2

562 **A. Schematic picture of the glycolysis pathway.** Genes regulating the various  
563 metabolite conversions in glycolysis, for which protein expression changes after miR-  
564 31 overexpression are indicated.

565 **B. miR-31 affects glucose uptake.** Measurement of 2-NBDG uptake in different cell  
566 lines by flow cytometry. n=3 replicates, data are represented as mean ± SD, and are  
567 compared to ctrl, \*,  $p < 0.05$ ; \*\*,  $p < 0.01$ ; \*\*\*,  $p < 0.001$ .

568 **C. miR-31 affects mRNA expression of glycolytic enzymes.** qRT-PCR analysis of  
569 glycolytic gene expression in HaCaT cells upon miR-31 overexpression.  $\beta$ -actin was  
570 used as a house-keeping control gene, n=3, data are represented as mean ± SD,  
571 and compared to ctrl, \*,  $p < 0.05$ ; \*\*,  $p < 0.01$ .

572 **D. miR-31 expression does not affect glucose to lactate flux under normal**  
573 **glucose condition.** Standard glycolysis stress test (10 mM glucose) of HaCaT cells  
574 treated with miR-31 overexpression (upper panel). Extracellular acidification rate  
575 (ECAR) was baselined to third measurement. Gluc, glucose; Oligo, oligomycin; 2-  
576 DG, 2-Deoxy-D-glucose. Results from three different cell lines were summarized in  
577 bottom panel. n=5-9, data presented as mean ± SD.

578 **E. miR-31 expression increases lactate production under low glucose**  
579 **condition.** Low glucose addition (1 mM) of glycolysis stress test of HaCaT cells  
580 upon miR-31 overexpression. ECAR (up panel) and oxygen consumption rate (OCR,  
581 bottom panel) were normalized to protein concentration. n=5, data presented in  
582 mean ± SD, and compared to ctrl, \*\*\* means  $p < 0.001$ .

583 **F. miR-31 lowers PC and PDHX expression.** Western blot analysis of PC and  
584 PDHX expressions in HaCaT cells, Tubulin  $\alpha$  was used as loading control.

585 **G-H. Downregulation of PC and PDHX phenocopies miR-31.** Low glucose  
586 addition (1 mM) in glycolysis stress test of HaCaT cells upon UK5099 (an inhibitor of  
587 mitochondrial pyruvate carrier, G) or pyruvate carboxylase siRNA (si-PC, H)

588 treatments. ECAR and OCR were normalized to protein concentration. n=4, data  
589 presented in mean± SD, and compared to ctrl, \*, p<0.05; \*\*, p<0.01; \*\*\*, p<0.001.  
590 p values (indicated about relevant comparison) were calculated by Two-way ANOVA  
591 with Sidak test (B- E, G and H).

592

### 593 **Figure 3**

594 **A. Schematic diagram of glutaminolysis pathway.** TCA cycle, tricarboxylic acid  
595 cycle; Alpha-KG, alpha-ketoglutarate; GS, glutamine synthetase; GLS, glutaminase;  
596 GDH, glutamate dehydrogenase; GOT1/2, Glutamic-oxaloacetic transaminase 1/2;  
597 AGC1, aspartate/glutamate transporter; ME1/2, malic enzyme 1/2.

598 **B. miR-31 regulates protein expression of enzymes involved in glutaminolysis.**  
599 Western blot analysis of GLS, GS, GOT1, GOT2, AGC1 in HaCaT cells, Tubulin  $\alpha$   
600 was used as loading control.

601 **C. miR-31 regulates glutaminolysis.** Violin plot of glutamine consumption,  
602 glutamate secretion, and cystine consumption of HaCaT cells upon different  
603 treatments. Metabolites were detected by targeted LC-MS metabolomics and  
604 normalized to fresh medium for the calculation of consumption or secretion. n=12, \*,  
605 p<0.05; \*\*, p<0.01; \*\*\*, p<0.001.

606 **D. miR-31 regulates mitochondrial metabolism through glutaminolysis.**  
607 Mitochondrial stress test of HaCaT cells with miR-31 treatment. Cells were pre-  
608 cultured in medium with or without glutamine overnight. OCR normalized to protein  
609 concentration. FCCP, Carbonyl cyanide 4-(trifluoromethoxy)phenylhydrazine; R+A,  
610 antimycin and rotenone. n=3, statistic result marked with green means difference  
611 between miR-31-Gln 0 mM and Ctrl-Gln 0 mM groups; marked with pink represent  
612 comparison of miR-31-Gln 4 mM vs Ctrl-Gln 4 mM; \*\*, p<0.01; \*\*\*, p<0.001.

613 **E-F. Requirement for GLS and AGC1 for miR-31 regulated glutamine-**  
614 **dependent mitochondrial metabolism.** Glycolysis (upper panel) and mitochondrial  
615 (bottom panel) stress tests of HaCaT cells upon CB839 (an inhibitor of GLS, E) and  
616 AGC1 siRNA (si-AGC1) treatments under low glucose (1mM) supplementation. n=3-  
617 5, statistic result marked with pink represents comparison of miR-31 and Ctrl (E);  
618 green(E), CB839 vs miR-31+ CB839; green (F), miR-31 vs miR-31+ si-AGC1; black  
619 (F), miR-31 vs black; \*, p<0.05; \*\*\*, p<0.001.

620 **G. miR-31 directs glutamine flux to aspartate.** Cellular and extracellular levels of  
621 metabolites were detected by targeted metabolomics using C13 glutamine tracing  
622 protocol in a time course. n=3, data presented in mean± SD, compared to ctrl, \*,  
623 p<0.05; \*\*, p<0.01; \*\*\*, p<0.001.

624 **H. miR-31 enhances lactate labeling derived from glutamine.** The dashed and  
625 solid lines represent the intracellular and extracellular lactate levels under different  
626 intervention conditions, respectively. n=3, data presented in mean± SD, compared to  
627 ctrl-medium, \*\*\*, p<0.001.

628 **I. miR-31 increases extracellular glutamate and aspartate.** Heatmap  
629 representation of relative amino acid concentrations in cell culture medium after miR-  
630 31 overexpression.

631 **J. Glutamine uptake regulates glucose uptake.** 2-NBDG intensity was measured  
632 by flow cytometry for the comparison of glucose uptake in HaCaT cells with different  
633 treatments. n=3, data represent mean± SD, and compared to ctrl, \*\*\*, p<0.001.

634 **K. GS knockdown is not sufficient to phenocopy metabolic regulation of miR-**  
635 **31.** Glycolysis (upper panel) and mitochondrial (bottom panel) stress tests of HaCaT  
636 cells upon GS siRNA (si-GS) treatments under low glucose (1mM) supplementation.  
637 n=5, data are represented as mean± SD, compared to si-ctrl, \*\*\*, p<0.001.

638 p values (indicated for relevant comparison) were calculated by One-way ANOVA  
639 with Sidak test (C and I), Two-way ANOVA with Sidak test (D-G), or Student's t-test  
640 (I).

641

#### 642 **Figure 4**

643 **A. miR-31 regulates cell growth under limiting glucose condition.** Cell growth  
644 curves of HaCaT cells with or without miR-31 overexpression in medium with or  
645 without glutamine or glucose as indicated. n=5, data showed in mean  $\pm$  SD,  
646 compared to ctrl, \*\*, p<0.01; \*\*\*, p<0.001.

647 **B. GLS inhibition impairs viability of miR-31 expressing cells.** Cell viability of  
648 HaCaT cell was measured by MTS assay. n=4, data showed in mean  $\pm$  SD,  
649 compared to ctrl, \*, p<0.05; \*\*, p<0.01; \*\*\*, p<0.001.

650 **C. miR-31 expression is regulated by glucose levels.** qRT-PCR analysis of miR-  
651 31 expression in HaCaT cells cultured at different glucose concentrations in the  
652 culture medium. RNU6-1 was used as house control gene. n=4, data are  
653 represented as mean  $\pm$  SD, compared to ctrl, \*\*, p<0.01.

654 **D. The miR-31 target GS is regulated by glucose.** GS expression in HaCat cells  
655 was determined by immunoblotting of total cell protein lysates. Cells expressed  
656 control mimic miR or miR-31 and were cultured in medium with indicated glucose  
657 concentration (upper panel) or glycolysis was blocked using different concentrations  
658 of 2-deoxy-glucose as indicated. Tubulin  $\alpha$  was used as control for equal loading of  
659 protein.

660 **E-F. miR-31-dependent glutamine metabolism regulates expression of a subset  
661 of cytokines.** Heatmap representation of cytokine expression in HaCaT cells  
662 induced upon miR-31 expression (E) or TNFa treatment (F). CB-839 treatment was  
663 used to determine dependency on extracellular glutamine usage for expression of  
664 cytokines.

665 **G. IL-21, TGFb1, and aspartate enhance Th17 cell differentiation.** The

666 proportions of CD4+CD25-RORyt+Th17 cells in CD4+CD25- T cells were analysed  
667 by FACS. Asp, aspartate; Glu, glutamate.

668 p values (indicated about relevant comparison) were calculated by Two-way ANOVA  
669 with Sidak test (**A** and **B**) or One-way ANOVA with Sidak test (**C** and **G**).

670

#### 671 **Figure 5**

672 **A-D. Characterization of psoriasis parameters in patient cohort.**

673 **A.** Violin plot of epidermal thickness of skin biopsies taken from healthy people (HC)  
674 and psoriasis patients (Ps). n=5, \*\*\*, p<0.001.

675 **B.** Cell proliferation as assessed by Ki67 immunostaining of skin from HC and Ps.  
676 Number of Ki67 positive staining cell was counted as for quantification (right panel).  
677 Dashed lines indicate the boarder of epidermis and dermis respectively. n=5, data  
678 are represented as mean  $\pm$  SD, compared to ctrl, \*\*\*, p<0.001.

679 **C.** Representative pictures of in situ hybridization (ISH) staining of miR-31 in skin  
680 biopsies from HC (n=8) and Ps (n=7). Quantification of results showing the average  
681 level of miR-31 in skin epidermis (right panel), mean  $\pm$  SD, \*\*\*, p<0.001.

682 **D.** GLUT1, GLS, and GS staining of human skin revealed a different metabolic  
683 signature between Ps and HC. Dashed line indicates the boarder of epidermis and  
684 dermis. n=5 in each group.

685 **E.** Schematic picture illustrating expression distribution in the epidermis of  
686 miR-31, GLUT1, GLS and GS of normal skin versus psoriatic skin.

687 **F. Distribution of miR-31 expression in IMQ model skin.** Representations of in  
688 situ hybridization staining (ISH) of miR-31 in skin biopsies from mouse of normal  
689 (Ctrl, n=3) and imiquimod-induced psoriatic mouse model (IMQ, n=6). Quantification  
690 result showing the average level of miR-31 in epidermis(right panel), mean  $\pm$  SD ,  
691 \*\*\*,  $p < 0.001$ .

692 **G-H. GLS inhibition alleviates psoriasis pathology.**

693 G. Disease activity was evaluated by Baker's score, epidermal thickness, and Ki67  
694 positive cells in basal layer of epidemics. n=4-5, mean  $\pm$  SD , \*\*,  $p < 0.01$ ; \*\*\*,  
695  $p < 0.001$ .

696 H. **GLS inhibition reduces the number of immune cells.** Representative pictures  
697 of Immunohistochemistry staining of CD4 (upper panel) and MPO (bottom panel) in  
698 skin biopsies from mouse (n=4-5). Quantification result showing the average number  
699 of CD4 positive or MPO positive cells in skin (right panel), mean  $\pm$  SD , \*\*,  $p < 0.01$  ,  
700 \*\*\*,  $p < 0.001$ .

701 **I. Model summary of cell coexist through metabolism reprogramming in  
702 different disease.**

703 p values (indicated about relevant comparison) were calculated by Student's t-test  
704 (A-C, F), and One-way ANOVA with Sidak test (G and H).

705

706 **Extended data Figure 1**

707 A. Violin plot of miR-31 host gene (miR-31 HG) expression in human skin biopsies.  
708 Data extracted from an online microarray study (GSE13355). n=64/58 in healthy  
709 control (HC)/psoriasis patient (PN, psoriatic non-lesional skin; PL, psoriatic lesional  
710 skin), respectively. mean  $\pm$  SD, p values were calculated by One-way ANOVA with  
711 Sidak test, \*\*\*,  $p < 0.001$ .

712 B. Schematic representation of the workflow for SILAC proteomics.

713 C. Volcano plots summarizing SILAC proteomics data in HEK 293T (upper panel)  
714 and HaCaT (bottom panel) cell lines.

715 D. Correlation analysis of SILAC proteomics data of two cell lines.

716 E. Volcano plot representations of changes of validated targets of miR-31 in HEK  
717 293T cell (left) and HaCaT cell (right) proteomics.

718 F. Principal component analysis (PCA) shows a clear distinction between the miR-31  
719 and normal HEK 293T cells, indicating a specific metabolism signature induced by  
720 miR-31 overexpression.

721 G. Metabolic pathway enrichment analysis using miR-31-induced significant changed  
722 metabolites as input. Those most predicted pathways are highlighted in red.

723

724 **Extended data Figure 2**

725 A. Measurement of 2-NBDG uptake in HaCaT cells by flow cytometry.

726 B-C. 2-NBDG uptake of HaCaT cells in response to glucose (B) and insulin (C)  
727 additions. n=3, mean  $\pm$  SD, \*\*\*,  $p < 0.001$ .

728 D. Immunostaining of GLUT1 in HaCaT cells of 48 hours treatments of scramble,  
729 miR-31 mimic and GLUT1 siRNA (si-GLUT1). DAPI is grey and GLUT1 is green.  
730 Similar results were obtained from three independent experiments.

731 p values (indicated about relevant comparison) were calculated by Student's t-test  
732 and One-way ANOVA with Sidak test (C), Two-way ANOVA with Sidak test (B).

733

734 **Extended data Figure 3**

735 A. qRT-PCR analysis of SLC7A11 and SLC3A2 in HaCaT cells. n=7, mean  $\pm$  SD, p  
736 values was calculated by One-way ANOVA with Sidak test, \*\*\* means  $p < 0.001$ .

737 B. Baseline ECAR and OCR of HaCaT cells in response to glutamine or glutamate  
738 addition in a long-term observation. n=5, mean  $\pm$  SD.

739 C. A summary scheme showing how miR-31 rewires glutamine metabolism.

740

#### 741 **Extended data Figure 4**

742 A. Representative picture of cell colony forming assay of HaCaT cells in response to  
743 CB839 treatment, n=3 replicates.

744

#### 745 **Extended data Figure 5**

746 A. Quantification of results of GLUT1, GLS, and GS staining of human biopsies. S+G  
747 layers, spinous layer and granular layer of epidermis; B+S+G layers, basal layer,  
748 spinous layer and granular layer. \*, p<0.05; \*\*\*, p<0.001.

749 B. Representative pictures of skin from imiquimod (IMQ)-induced mice in a time  
750 course, n=3.

751 C. Quantification of skin epidermal thickness of mice with IMQ induction in a time  
752 course, n=3.

753 D. GLS and GLUT1 staining of skin from IMQ-induced mouse in a time course.  
754 Quantification results showed on right panel. n=3, \*, p<0.05; \*\*, p<0.01; \*\*\*, p<0.001.

755 E. Histological staining of skin indicating lesser blood vessels in CB-839 treatment  
756 mice. Blood vessel was highlighted by arrow. Quantification on right panel, n=4-5,  
757 mean  $\pm$  SD, \*\*, p<0.01; \*\*\*, p<0.001.

758 F. Ki67, GLUT1, GLS, and GS staining of skin from mice with different treatments.  
759 Quantification results on right panel, n=4-5, mean  $\pm$  SD, \*, p<0.05; \*\*, p<0.01.

760 p values (indicated about relevant comparison) were calculated by One-way ANOVA  
761 with Sidak test (C, E and F), or Two-way ANOVA with Sidak test (A and D).

762

763 **Extended Table 1:** listing of overlap between proteomic changes and literature  
764 validated miR-31 targets.

765

766 **Extended Table 2:** miR-31 seed sequences in 3'UTR of metabolic genes

767

768 **Extended Table 3:** metabolite profiling upon miR-31 overexpression (targeted  
769 metabolomics, Fig.1d)

770

771 **Extended Table 4 is:** cytokine production in response to miR-31 over expression  
772 and CB-839 treatment. (belonging to Luminex data, Fig. 4e)

773

774 **Extended Table 5:** cytokine production in response to TNF-alpha and CB-839  
775 treatment. (belonging to Luminex data, Fig. 4f)

776

777 **Extended Table 6:** list of primers used for RTqPCR

778

779 **Extended Table 7:** list of antibodies used for IHC study.

780

781

#### 782 **Acknowledgements**

783 We wish to thank Prof Matthew vander Heiden (MIT, Boston), Dr. Emmerik Leijten  
784 (Rheumatology, UMCU) Dr. Prof Nanda Verhoeven-Duif, Dr Judith Jans (Metabolic  
785 Genetics, UMCU) Maria Rodriguez-Colman, and other members of the Burgering lab  
786 for comments and discussion. Research in the Burgering lab is financially supported



787 by a the Oncode Institute. Research at the Second Affiliated Hospital, Guangzhou  
788 University of Chinese Medicine is supported by a grant of the National Natural  
789 Science Foundation of China (No.81873302) and 3 grants of Guangdong Provincial  
790 Hospital of Chinese Medicine ( No. 2019KT311, No. 2019KT312, and No.  
791 2019KT313).

792 Animal experiments were approved by Animal ethics committee of Guangdong  
793 Provincial Hospital of Chinese Medicine (China, No. 2018068).

794

795

796

## 797 **Materials and methods:**

798

### 799 **Cell culture**

800 HEK293T and HaCaT cells were cultured in DMEM (Gibco) supplemented with 10%  
801 FBS and 1% penicillin–streptomycin. CCD 1102 KERTr (ATCC® CRL-2310™) and  
802 CCD 1106 KERTr (ATCC® CRL-2309™) were cultured in Keratinocyte-Serum Free  
803 Medium (Gibco 17005-042) with added Keratinocytes Supplements (Gibco 37000-  
804 015) including Bovine Pituitary Extract (BPE; Gibco 13028-014) and human  
805 recombinant epidermal growth factor (EGF; Gibco 10450-013). All cells were  
806 cultured at 37 °C and 5% CO<sub>2</sub>.

807

### 808 **Glucose uptake measurement**

809 A nonradioactive assay was performed for the measurement of glucose uptake in  
810 different cell lines by using 2-NBDG (2-(N-(7-nitrobenz-2-oxa-1, 3-diazol-4-yl)  
811 amino)-2-deoxyglucose, Cayman chemicals, USA), a fluorescent deoxyglucose  
812 analog. Briefly, cells were incubated with 50μM of 2-NBDG in a cell incubator with  
813 37°C for one hour. Then, cells were collected and washed by 2 times of PBS. In the  
814 end, cells were stained with PI about 5 mins for identification of live cells, and then  
815 loaded into Celesta flow cytometer (BD Biosciences) for FACS analysis.

816

### 817 **Proliferation Measurement**

818 For cultured cell proliferation, equal HaCaT cells numbers (150,000 cells per well)  
819 were seeded in 6-well plate, overexpressed with miR-31 mimic or scramble miRNA  
820 mimic (Ctrl) in indicated medium (complete growth medium with 25 mM glucose and  
821 4 mM glutamine, glutamine starvation medium with 25 mM glucose and without  
822 glutamine, and glucose starvation medium with 4 mM glutamine and without glucose,  
823 refreshed medium at day 3), harvested at indicated times, and then counted in the  
824 presence of Trypan blue (Biorad, 145-0013). For colony-forming assay, HaCaT cells  
825 were seeded in 6-well plates and treated with overexpression of miR-31 mimic or  
826 inhibitor for 36h, followed with 10 μM CB-839 addition. Cell culture medium and CB-  
827 839 were refreshed every 3day in a total of 14 days treatment. For staining, cells  
828 were washed with PBS twice, fixed with 100% methanol 20 mins, and stained with  
829 0.25% Crystal Violet (Sigma, C0775) in 6.25% ethanol for 30min at room  
830 temperature, washed 3 times with ddH<sub>2</sub>O, dried at room temperature, and  
831 photographed.

832

### 833 **MTS assay**

834 Cells were plated in 96-well microtiter plate and received different treatments before  
835 MTS assay. For the MTS assay, 20ul of MTS reagent was directly added into the

836 culture medium and incubated at 37°C incubator for 3h. Finally, the formazan dye is  
837 quantified by measuring the absorbance at 490nm.

838

### 839 **RNA extraction and quantitative Realtime-PCR**

840 Total mRNA was extracted following the manufacture of Qiagen RNeasy Kit  
841 (Qiagen), and reversed transcribed using the iScript cDNA Synthesis Kit (Bio-Rad).  
842 qReal-time PCR was performed using SYBR Green FastStart Master Mix (Roche) in  
843 the CFX Connect Real-time PCR detection system (Bio-Rad). Data was normalized  
844 to beta-actin and presented as a relative expression level that was calculated by  
845 using delta delta Ct analysis. All primer sequences of targeted genes, where derived  
846 from primerbank (<https://pga.mgh.harvard.edu/primerbank/>) and described in  
847 Extended table 6. For quantification of microRNA expression, mature miR-31 was  
848 quantified using MystiCq® microRNA qPCR Assay (Sigma, MIRRM00-100RXN)  
849 according to the manufacturer's instructions. Primer of miR-31 was ordered from  
850 Sigma (MIRAP00090) and RNU6-1 was used as the internal control (Sigma,  
851 MIRCP00001).

852

### 853 **Stable isotope labelling of amino acids in cell culture (SILAC) experiment** 854 **setup**

855 For SILAC labelling HaCaT cells were cultured in SILAC-labelled DMEM (Thermo  
856 Fisher Scientific) with 10% dialyzed FBS and 1% of penicillin/streptomycin containing  
857 L-arginine and L-lysine (light medium) or 13C6-L-arginine and 3C6-L-lysine (heavy  
858 medium) for at least 14 days to eliminate non labelled arginine and lysine. The day  
859 before the transfection,  $1.5 \times 10^5$  cells were seeded in a 6-well plate in a final volume  
860 of 3mL. On the next day, the medium was changed and the 60-70% confluent cells  
861 were transfected with a specific miRNA mimic either for miR-31 mimic or control  
862 miRNA mimic at a final concentration of 30nM together with lipofectamine RNAiMAX  
863 and Opti-MEM. 48h post transfection cells were harvested by adding lysis buffer  
864 containing 8M Urea, 1M ammonium bicarbonate, 10nM tris (2-carboxyethyl)  
865 phosphine, 40nM chloroacetamide. Cell lysates were incubated at 95°C for 5 min,  
866 sonicated and diluted to 2M Urea with 1M ABC. After protein quantification using the  
867 BCA protein assay, cell lysates from miR-130a or miR-708 transfected cells  
868 generated from heavy medium and SCR transfected cells from light medium were  
869 mixed 1:1 (reverse mode) and vice versa (forward mode). Proteins were digested  
870 overnight with 2% (w/w) trypsin, next peptides were fractionated based on their  
871 molecular mass using ultra performance liquid chromatography (UltiMate-3000  
872 system, Thermo Fisher Scientific) and finally desalted and acidified on a C-18  
873 cartridge (3M, Saint Paul, Minnesota, USA). C18-stagetips were activated with  
874 methanol, washed with buffer containing 0.5% formic acid in 80% ACN (buffer B)  
875 and then with 0.5% formic acid (buffer A). After loading of the digested sample,  
876 stage-tips were washed with buffer A and peptides were eluted with buffer B, dried in  
877 a SpeedVac, and dissolved in buffer A. Peptides were electro-sprayed directly into  
878 an Orbitrap Fusion Tribrid Mass Spectrometer (Thermo Fisher Scientific) and  
879 analysed in Top Speed data-dependent mode. Raw files were analysed using  
880 Maxquant software. For identification, the human Uniport 2017 was searched with  
881 both the peptide as well as the protein false discovery rate set to 1%. Proteins  
882 identified were filtered for reverse and decoy hits, standard contaminants and  
883 selected to have more than 1 unique or razor peptide by using the Perseus software  
884 1.5.1.6. Heavy/light normalized ratios (ratio reverse and ratio forward) were used to

885 quantify protein expression and were further processed for comparative analysis of  
886 differential expression among the conditions.

887

### 888 **Western blot analysis and immunofluorescence**

889 Cells were lysed in sample buffer (0.2% m/v SDS, 10% v/v glycerol, 0.2% v/v  $\beta$ -  
890 mercaptoethanol, 60 mmol/L Tris pH 6.8) for protein extraction. Proteins were  
891 detected using 7.5%–12.5% SDS-PAGE gels and subsequent Western blot analysis  
892 with primary antibodies detected by HRP-conjugated secondary antibody. Unless  
893 stated otherwise, alpha-tubulin were used as a loading control. For  
894 immunofluorescence, cells were fixed with 3.7% paraformaldehyde in PBS,  
895 permeabilized with 0.1% v/v Triton in PBS, and blocked with 2% m/v BSA (Sigma).  
896 Cells were subsequently incubated with primary antibody and visualized with Alexa  
897 secondary antibody (Sigma).

898

### 899 **Bioenergetics**

900 Seahorse Bioscience XFe24 Analyzer was used to measure extracellular  
901 acidification rates (ECAR) in mpH/minute and oxygen consumption rates (OCR) in  
902 pmol O<sub>2</sub>/minute. Cells were seeded in 6-well plates and transfected with indicated  
903 miRNA mimic (scramble or miR-31-5p) or indicated si-RNAs (si-PC, si-GS, and si-  
904 AGC1) for 36h, or treated with pharmaceutical drugs (CB-839 (10 mM final  
905 concentration) or UK 5099 (25 mM final concentration) for 24h. Thereafter, cells  
906 were seeded in XF24 polystyrene cell culture microplates (Seahorse Bioscience) at a  
907 density of 10,000 cells per well. 1 hour before the measurements, culture medium  
908 was replaced and the plate was incubated for 60 minutes at 37 °C. For the  
909 mitochondrial stress test, culture medium was replaced for Seahorse XF Base  
910 medium (Seahorse Bioscience), supplemented with 20 mM glucose (Sigma-Aldrich),  
911 2 mM L-glutamine (Sigma-Aldrich), 5mM pyruvate (Sigma-Aldrich) and 0.56  $\mu$ l NaOH  
912 (1M). During the test 5  $\mu$ M oligomycin, 2  $\mu$ M FCCP and 1  $\mu$ M of Rotenone and  
913 Antimycin A (all Sigma-Aldrich) were injected to each well after 18, 45 and 63  
914 minutes respectively. For the glycolysis stress test, culture medium was replaced for  
915 Seahorse XF Base medium, supplemented with 2mM L-glutamine and 0.52  $\mu$ l/ml  
916 NaOH (1M). Sensor cartridges (pre-hydrated in XF calibrant solution overnight in a  
917 CO<sub>2</sub>-free incubator) were loaded with glucose (Port A), oligomycin (Port B), and 2-  
918 deoxyglucose (2-DG, Port C) to achieve concentrations of 1 mM, 2  $\mu$ M, and 50 mM,  
919 respectively, after injection. During the test 10 mM glucose, 5  $\mu$ M oligomycin and  
920 100 mM 2-deoxyglucose (2-DG) (Sigma-Aldrich) were injected to each well after 18,  
921 36 and 65 minutes respectively. After injections, measurements of 2 minutes were  
922 performed in triplo, preceded with 4 minutes of mixture time. The first measurements  
923 after oligomycin injections were preceded with 5 minutes mixture time, followed by 8  
924 minutes waiting time for the mitochondrial stress test and 5 minutes mixture time  
925 followed by 10 minutes waiting time for the glycolysis stress test.

926 For OXPHOS assay, cells were washed and preincubated with basic medium  
927 contained 1 mM D-glucose and 2mM glutamine. The sensor cartridge was loaded  
928 with oligomycin (Port A), FCCP (Port B), and rotenone/antimycin A (Port C) to  
929 achieve final concentrations of 2  $\mu$ M, 1  $\mu$ M, and 2 $\mu$ M, respectively, after injection.  
930 Oxygen consumption rate (OCR) was measured using the measurement protocol  
931 described above. Both ECAR and OCR were normalized to individual protein  
932 amount, and data was analysed using the XF Mito Stress Test Report Generator.

933

### 934 **Clinical specimens**

935 Skin specimens were obtained from the Guangdong Provincial Hospital of Chinese  
936 Medicine (China) with Institutional Review Board approval (BF2019-108-01), and  
937 written informed consent was obtained from all patients. A total of 10 cases,  
938 including 5 cases of psoriasis patients and 5 cases of healthy people with an age  
939 ranging from 23 to 46 y (mean, 37 y) and 31 to 49 y (median, 38 y) respectively,  
940 were enrolled in this study. Samples were formalin-fixed paraffin-embedded and  
941 were furtherly used for in situ hybridization detection of miR-31 and  
942 immunohistochemistry staining of specific proteins.

943

#### 944 **Animal experiments**

945 An imiquimod-induced mouse model (IMQ) of psoriasis was introduced in this study.  
946 8-week-old BALB/c mice were obtained from Guangdong experimental animal  
947 center, follow with shaved and chemically depilated dorsal hair. In brief, to establish  
948 an IMQ model, 50mg of imiquimod cream (5%) (Med-Shine Pharmaceutical, China)  
949 was applied topically onto the dorsal skin of mice continuously for 6 days. In this  
950 study, two independent animal experiments were processed. In order to investigate  
951 metabolic enzymes expression in association with the pathology development of  
952 psoriasis, we harvested lesioned skin from IMQ mice (n=3) every other day, from  
953 day 0 to day 10. In addition, mouse experiment were performed in parallel to study  
954 the therapy effect of CB-839 in psoriasis. Starting from the second day of imiquimod  
955 induction, BALB/c mice were assigned to received DMSO, CB839 (0.6  
956 mg/mouse/day), or Calcipotriol and Betamethasone Dipropionate Gel (50  
957 µg/mouse/day, commercial name: Xamiol, LEO laboratories Lsd., USA) topically  
958 prior to imiquimod treatment in a total of 6 days. The mouse experiment was  
959 approved by Animal ethics committee of Guangdong Provincial Hospital of Chinese  
960 Medicine (China, No. 2018068).

961

#### 962 **Immunohistochemistry (IHC) and Hematoxylin & Eosin Y staining (HE)**

963 Biopsies were harvested from dorsal skin of mice and fixed with 10% neutral  
964 buffered formalin (NBF) about 48h. After paraffin-embedding, all samples were cut  
965 into 4µm sections and attached to microslide. Heat-induced antigen repair was  
966 performed by using a pressure cooker and natural cooled down about 10 mins) in.  
967 Sections were deparaffinized, heat retrieved (buffer with 1 citrate buffer, pH 6,  
968 cooked for 2 mins in pressure cooker and kept in 94–96 °C for 10min, cooled  
969 naturally), perforated (0.2% TBST, 10 min), blocked in 2% BSA (Sigma, A9418) and  
970 then incubated with antibodies listed in Extended table 7. The immunostaining was  
971 performed using an EliVision System-HRP DAB (MXB, DAB-2031). In the end,  
972 sections were counterstained with hematoxylin, dehydrated and cover slipped. HE  
973 was performed under the manufacturer's instructions. The staining was quantified  
974 using Image J. All IHC and HE staining shown are representative of three or more  
975 sections.

976

#### 977 **In situ hybridization**

978 For miR-31 in situ hybridizations, digoxigenin (DIG)-labelled probes (Exiqon) were  
979 used following the manufacturer's protocol. Both DIG-labelled miR-31 and scrambled  
980 probes (Exiqon) were hybridized at 61°C. U6 probe was used as the positive control.  
981 In situ signals were detected by staining with Anti-DIG-AP antibody (Sigma,  
982 cat.11093274910) and developed using NBT/CBIP purple substrate (Sigma,  
983 cat.11697471001). Sections were counterstained with nuclear fast red (VECTOR,

984 cat. H3403) for 1 min and washed by flowing water. The quantification was  
985 performed by using Image J.

986

### 987 **Targeted analysis of the cellular metabolome**

988 The targeted metabolomics was performed using Hydrophilic Interaction  
989 Chromatography - Mass Spectrometry (HILIC-MS) in negative mode. Cells washed  
990 with PBS were transferred to 2 mL Eppendorf tubes and homogenized in ice cold  
991 80% methanol. After centrifugation at 15000g for 10 min the supernatant was  
992 transferred to a clean Eppendorf tube and evaporated to dryness at 35°C in a Pierce  
993 Reacti-Therm III under a gentle stream of nitrogen gas. The residue was dissolved  
994 in 70  $\mu$ L 5% acetonitrile in milli-Q water, centrifugated for 5 min at 10000g, and  
995 transferred to a clean injection valve for UPLC-MS analysis. The UPLC-MS system  
996 was composed of a Waters Acquity M-class coupled to a Waters VION Q-ToF.  
997 Chromatographic separation was performed using a SeQuant ZIC-cHILIC column  
998 (150x1 mm, 3  $\mu$ m) operated at 70  $\mu$ L min<sup>-1</sup>. Autosampler temperature was kept at  
999 4°C, the column oven was kept at 40°C. Mobile phase A consisted of 95%  
1000 acetonitrile in Milli-Q water containing 5 mM ammonium acetate (pH6.8). Mobile  
1001 phase B consisted of 5% acetonitrile in Milli-Q water containing ammonium acetate  
1002 (pH6.8). The step gradient program took 30 min. The gradient was kept at 25% B for  
1003 2 min after an injection of 5  $\mu$ L of sample. Thereafter the gradient linearly increased  
1004 to 70%B in the following 3 min and was kept at 70% for 4 min. The gradient linearly  
1005 decreased to 25% B in 2 min and the column was allowed to recondition for 19 min  
1006 prior to the next analysis. MS analysis was performed using a VION Q-ToF operated  
1007 in full scan mode (75-900 m/z) and in negative mode only. Capillary voltage was set  
1008 to 1 kV, the sampling cone was set to 20V. Source temperature was 120°C,  
1009 desolvation temperature was 450°C. Cone gas flow was 50 L h<sup>-1</sup> and desolvation  
1010 gas flow was set to 800L h<sup>-1</sup>. The lock mass was Leucine enkephaline. Standard  
1011 solutions were used to determine both retention time and m/z values ( $\Delta$  m/z < 2  
1012 ppm). Analysis was conducted with the system operation software UNIFY.

1013

### 1014 **Amino acid assay**

1015 A volume of 15  $\mu$ L medium was transferred to a labelled 1.5 mL Eppendorf vial. A  
1016 volume of 285  $\mu$ L 80% acetonitrile also containing internal standards (final  
1017 concentration 10  $\mu$ M) was added and the sample was thoroughly mixed. The sample  
1018 was centrifuged for 10 min at 17000xg in an Eppendorf centrifuge. A volume of 250  
1019  $\mu$ L was transferred to a new, labelled Eppendorf vial and evaporated to dryness. Cell  
1020 samples harvested in 300  $\mu$ L ice-cold methanol were subjected to the same protol.  
1021 The residue was dissolved in 70  $\mu$ L of borate buffer (pH 8.2) by thorough mixing and  
1022 the derivatisation was started by adding 20  $\mu$ L of AccQ-Tag reagent solution  
1023 prepared according to the suppliers protocol (Waters, Etten-Leur, The Netherlands)  
1024 after which the samples were vortex mixed and incubated at 55°C for 10 min. The  
1025 sample was evaporated to dryness and the residue was dissolved in 120  $\mu$ L 10%  
1026 acetonitrile containing 0.1 mM formic acid and transferred to an LC sample vial.  
1027 Analysis was performed on a system consisting of an Ultimate 3000 LC and an LTQ-  
1028 Orbitrap XL (Thermo Scientific, Breda, The Netherlands). As a column a Waters  
1029 HSS T3 (2.1x100 mm, 1.8  $\mu$ m) was used, kept at a temperature of 40°C in the  
1030 column oven. Eluent A used for analysis was milliQ water containing 0.1% formic  
1031 acid, eluent B consisted of acetonitrile containing 0.1% formic acid. The LC gradient  
1032 used for separation commenced by injecting 1  $\mu$ L of sample and started at 0% B for  
1033 5 min. followed by a 10 min linear gradient to 75% B. In 0.5 min the gradient

1034 increase to 100% B and kept there for 1 min before returning to 0% B. The column  
1035 was allowed to regenerate for 2.5 min prior to a next analysis. Total runtime was 18  
1036 min; flow rate was 400  $\mu$ L/min. The mass spectrometer was operated in ESI-positive  
1037 mode, full scan 100 – 1000 m/z, capillary temperature 300°C, sheath gas: 35, aux  
1038 gas:2, resolution 30000, capillary voltage 3 kV.

1039

1040

#### 1041 **Glutamine tracing**

1042 HaCAT cells were transfected with control scrambled miRNA or miR-31. After 32 hrs  
1043 culture medium was replaced with 0.5%FBS DMEM with 1mM glucose, without  
1044 glutamine for 16h. To start glutamine labelling, the medium was replaced with DMEM  
1045 contains 0.5%FBS, 1mM glucose, and 2mM <sup>13</sup>C-glutamine. Samples were  
1046 harvested at the indicated time points after start of glutamine labelling. Medium was  
1047 collected and snap frozen and cell were immediately harvested in 100% ice cold  
1048 methanol

1049 Analysis was performed as described (Ciapaite *et al*, 2020), with following  
1050 modifications. Prior to analysis, calibration samples were prepared by dilution and  
1051 addition of internal standards. Calibration samples were prepared in the  
1052 concentration range from 0.08-80  $\mu$ M. 20  $\mu$ l of Internal standard mix (100  $\mu$ M) was  
1053 added to e500  $\mu$ l methanol sample extract or 50  $\mu$ l standard and evaporated under a  
1054 gentle flow of nitrogen at 40 °C. To the dried extract 25  $\mu$ l 0.1% NaOH and 25  $\mu$ l 10  
1055 mg/ml O-(2,3,4,5,6-pentafluorobenzyl)hydroxylamine (PFBHA) in Milli-Q water, was  
1056 added, vortexed for homogenization and for derivatization incubated for 30 min at  
1057 20°C. For determination of extracellular metabolites, to 50  $\mu$ l cell medium, 20  $\mu$ l of  
1058 Internal standard mix (100  $\mu$ M), 25  $\mu$ l 0.1% NaOH and 25  $\mu$ l 10 mg/ml O-(2,3,4,5,6-  
1059 pentafluorobenzyl)hydroxylamine (PFBHA) in Milli-Q water is added, vortex and  
1060 derivatize 30 min at 20°C.

1061 The derivatized metabolites were separated on a Sunshell RP-Aqua column (150 mx  
1062 3 mm i.d., 2.6  $\mu$ m; ChromaNik Technologies Inc., Osaka, Japan). The following  
1063 eluents were used: solvent A: 0.1% formic acid in H<sub>2</sub>O (v/v); solvent B: 0.1% formic  
1064 acid in ACN (v/v). Gradient elution was as follows: 0–2.75 min. isocratic 0% B, 2.75–  
1065 3.5 min. linear from 0% to 70% B, 3.5–6.0 min. isocratic 70% B, 6.0–6.2 min. linear  
1066 from 70% to 100% B, 6.2–9.0 min. isocratic 100% B, and 9.0-9.2 min. linear from  
1067 100% to 0% B, with 9.2-12 min. for initial conditions of 0% B for column equilibration.  
1068 Settings used were: Flow rate: 0.6 ml/min Column temperature: 40 °C; Autosampler  
1069 temperature: 15 °C; Injection volume: 5  $\mu$ l.

1070 The eluent was analyzed on a Q-Exactive HF mass spectrometer with the following  
1071 settings: detection mode: Full scan in negative ionisation mode; scan range: 70 to  
1072 900 m/z; resolution: 240000; AGC target: 1e6; Maximum IT: 200 ms; capillary  
1073 voltage: 4kV; capillary temperature: 300 °C; sheath gas: 50; aux gas: 2; spare gas:  
1074 0; S-lens RF level: 65; Ion source: ESI.

1075

1076

#### 1077 **Analysis of cytokine production by multiplexed particle-based flow cytometric 1078 assay (Luminex)**

1079 Cell culture supernatants were collected, stored at –80°C and processed as  
1080 described(Scholman *et al*, 2018). Cytokine concentrations were measured with the  
1081 Bio-Plex system in combination with the Bio-Plex Manager software, version 4.0  
1082 (Bio-Rad Laboratories, Hercules, CA, USA), which employs the Luminex xMAP  
1083 technology(Scholman *et al.*, 2018).

1084

1085 **Induction of *in vitro* Th17 differentiation**

1086 Spleens were harvested from C57BL/6 mice for lymphocyte isolation following the  
1087 protocol of Bedoya (Bedoya *et al*, 2013). CD4+CD25- naive T cells were  
1088 subsequently isolated by negative selection using magnetic beads (Cat: 130-104-  
1089 453, Miltenyi Biotech, Germany). Naive CD4+ T cells were stimulated with plate-  
1090 bound anti-CD3 (LOT: 4310627, eBioscience) and 1.5 µg/ml soluble CD28  
1091 monoclonal antibodies (Cat: 557393, BD biosciences pharmingen) in DMEM medium  
1092 and cytokines (IL-6, 20 ng/ml; TGF-b1, 5 ng/ml; IL-21, 25 ng/ml) or metabolites  
1093 (Glutamate 25µM; Aspartate 25µM) for a period of 5 days, at which point cells were  
1094 collected and were stained with the following antibodies: CD4-PE (LOT:2004774,  
1095 Invitrogen), RORyt-APC (LOT:2279171, Invitrogen) and CD25-PE-  
1096 Cy7(LOT:2073783, Invitrogen) and were analysed on a Novo Quanteon (Aglient).

1097

1098 **Literature cited**

1099

1100 Altman BJ, Stine ZE, Dang CV (2016) From Krebs to clinic: glutamine metabolism to cancer  
1101 therapy. *Nat Rev Cancer* 16: 619-634

1102 Armstrong AW, Read C (2020) Pathophysiology, Clinical Presentation, and Treatment of  
1103 Psoriasis: A Review. *JAMA* 323: 1945-1960

1104 Bedoya SK, Wilson TD, Collins EL, Lau K, Larkin J, 3rd (2013) Isolation and th17  
1105 differentiation of naive CD4 T lymphocytes. *J Vis Exp*: e50765

1106 Buck MD, Sowell RT, Kaech SM, Pearce EL (2017) Metabolic Instruction of Immunity. *Cell*  
1107 169: 570-586

1108 Chang CH, Qiu J, O'Sullivan D, Buck MD, Noguchi T, Curtis JD, Chen Q, Gindin M, Gubin  
1109 MM, van der Windt GJ *et al* (2015) Metabolic Competition in the Tumor Microenvironment  
1110 Is a Driver of Cancer Progression. *Cell* 162: 1229-1241

1111 Cheng T, Sudderth J, Yang C, Mullen AR, Jin ES, Mates JM, DeBerardinis RJ (2011)  
1112 Pyruvate carboxylase is required for glutamine-independent growth of tumor cells. *Proc Natl*  
1113 *Acad Sci U S A* 108: 8674-8679

1114 Ciapaite J, Albersen M, Savelberg SMC, Bosma M, Tessadori F, Gerrits J, Lansu N,  
1115 Zwakenberg S, Bakkers JPW, Zwartkruis FJT *et al* (2020) Pyridox(am)ine 5'-phosphate  
1116 oxidase (PNPO) deficiency in zebrafish results in fatal seizures and metabolic aberrations.  
1117 *Biochim Biophys Acta Mol Basis Dis* 1866: 165607

1118 Dixon SJ, Lemberg KM, Lamprecht MR, Skouta R, Zaitsev EM, Gleason CE, Patel DN,  
1119 Bauer AJ, Cantley AM, Yang WS *et al* (2012) Ferroptosis: an iron-dependent form of  
1120 nonapoptotic cell death. *Cell* 149: 1060-1072

1121 Friis NU, Hoffmann N, Gyldenlove M, Skov L, Vilsboll T, Knop FK, Storgaard H (2019)  
1122 Glucose metabolism in patients with psoriasis. *Br J Dermatol* 180: 264-271

1123 Garcia-Bermudez J, Baudrier L, La K, Zhu XG, Fidelin J, Sviderskiy VO,  
1124 Papagiannakopoulos T, Molina H, Snuderl M, Lewis CA *et al* (2018) Aspartate is a limiting  
1125 metabolite for cancer cell proliferation under hypoxia and in tumours. *Nat Cell Biol* 20: 775-  
1126 781

1127 Greb JE, Goldminz AM, Elder JT, Lebwohl MG, Gladman DD, Wu JJ, Mehta NN, Finlay  
1128 AY, Gottlieb AB (2016) Psoriasis. *Nat Rev Dis Primers* 2: 16082

1129 Hsieh JC, Estess RC, Kaneko I, Whitfield GK, Jurutka PW, Haussler MR (2014) Vitamin D  
1130 receptor-mediated control of Soggy, Wise, and Hairless gene expression in keratinocytes. *J*  
1131 *Endocrinol* 220: 165-178

1132 Ishihara H, Asano T, Tsukuda K, Katagiri H, Inukai K, Anai M, Kikuchi M, Yazaki Y,  
1133 Miyazaki J, Oka Y (1994) Overexpression of hexokinase I but not GLUT1 glucose

- 1134 transporter alters concentration dependence of glucose-stimulated insulin secretion in  
1135 pancreatic beta-cell line MIN6. *J Biol Chem* 269: 3081-3087
- 1136 Johnson MO, Wolf MM, Madden MZ, Andrejeva G, Sugiura A, Contreras DC, Maseda D,  
1137 Liberti MV, Paz K, Kishton RJ *et al* (2018) Distinct Regulation of Th17 and Th1 Cell  
1138 Differentiation by Glutaminase-Dependent Metabolism. *Cell* 175: 1780-1795 e1719
- 1139 Joyce CE, Zhou X, Xia J, Ryan C, Thrash B, Menter A, Zhang W, Bowcock AM (2011)  
1140 Deep sequencing of small RNAs from human skin reveals major alterations in the psoriasis  
1141 miRNAome. *Hum Mol Genet* 20: 4025-4040
- 1142 Kono M, Yoshida N, Maeda K, Tsokos GC (2018) Transcriptional factor ICER promotes  
1143 glutaminolysis and the generation of Th17 cells. *Proc Natl Acad Sci U S A* 115: 2478-2483
- 1144 Kornberg MD, Bhargava P, Kim PM, Putluri V, Snowman AM, Putluri N, Calabresi PA,  
1145 Snyder SH (2018) Dimethyl fumarate targets GAPDH and aerobic glycolysis to modulate  
1146 immunity. *Science* 360: 449-453
- 1147 Kuehl B, Shear NH (2018) The Evolution of Topical Formulations in Psoriasis. *Skin Therapy*  
1148 *Lett* 23: 5-9
- 1149 Laurila EM, Kallioniemi A (2013) The diverse role of miR-31 in regulating cancer associated  
1150 phenotypes. *Genes Chromosomes Cancer* 52: 1103-1113
- 1151 Lowes MA, Suarez-Farinas M, Krueger JG (2014) Immunology of psoriasis. *Annu Rev*  
1152 *Immunol* 32: 227-255
- 1153 Mrowietz U, Barker J, Boehncke WH, Iversen L, Kirby B, Naldi L, Reich K, Tanew A, van  
1154 de Kerkhof PCM, Warren RB (2018) Clinical use of dimethyl fumarate in moderate-to-severe  
1155 plaque-type psoriasis: a European expert consensus. *J Eur Acad Dermatol Venereol* 32 Suppl  
1156 3: 3-14
- 1157 Parisi R, Iskandar IYK, Kontopantelis E, Augustin M, Griffiths CEM, Ashcroft DM, Global  
1158 Psoriasis A (2020) National, regional, and worldwide epidemiology of psoriasis: systematic  
1159 analysis and modelling study. *BMJ* 369: m1590
- 1160 Reichenbach B, Classon J, Aida T, Tanaka K, Genander M, Goritz C (2018) Glutamate  
1161 transporter Slc1a3 mediates inter-niche stem cell activation during skin growth. *EMBO J* 37
- 1162 Scholman RC, Giovannone B, Hiddingh S, Meerding JM, Malvar Fernandez B, van Dijk  
1163 MEA, Tempelman MJ, Prakken BJ, de Jager W (2018) Effect of anticoagulants on 162  
1164 circulating immune related proteins in healthy subjects. *Cytokine* 106: 114-124
- 1165 Valastyan S, Weinberg RA (2010) miR-31: a crucial overseer of tumor metastasis and other  
1166 emerging roles. *Cell Cycle* 9: 2124-2129
- 1167 van den Berg WB, McInnes IB (2013) Th17 cells and IL-17 a--focus on immunopathogenesis  
1168 and immunotherapeutics. *Semin Arthritis Rheum* 43: 158-170
- 1169 van der Fits L, Mourits S, Voerman JS, Kant M, Boon L, Laman JD, Cornelissen F, Mus AM,  
1170 Florencia E, Prens EP *et al* (2009) Imiquimod-induced psoriasis-like skin inflammation in  
1171 mice is mediated via the IL-23/IL-17 axis. *J Immunol* 182: 5836-5845
- 1172 Wang Q, Chang W, Yang X, Cheng Y, Zhao X, Zhou L, Li J, Li J, Zhang K (2019) Levels of  
1173 miR-31 and its target genes in dermal mesenchymal cells of patients with psoriasis. *Int J*  
1174 *Dermatol* 58: 198-204
- 1175 Wang TS, Tsai TF (2017) Managing Scalp Psoriasis: An Evidence-Based Review. *Am J Clin*  
1176 *Dermatol* 18: 17-43
- 1177 Xia X, Cao G, Sun G, Zhu L, Tian Y, Song Y, Guo C, Wang X, Zhong J, Zhou W *et al* (2020)  
1178 GLS1-mediated glutaminolysis unbridled by MALT1 protease promotes psoriasis  
1179 pathogenesis. *J Clin Invest* 130: 5180-5196
- 1180 Xu N, Meisgen F, Butler LM, Han G, Wang XJ, Soderberg-Naucler C, Stahle M, Pivarsci A,  
1181 Sonkoly E (2013) MicroRNA-31 is overexpressed in psoriasis and modulates inflammatory  
1182 cytokine and chemokine production in keratinocytes via targeting serine/threonine kinase 40.  
1183 *J Immunol* 190: 678-688



1184 Yan S, Xu Z, Lou F, Zhang L, Ke F, Bai J, Liu Z, Liu J, Wang H, Zhu H *et al* (2015) NF-  
1185 kappaB-induced microRNA-31 promotes epidermal hyperplasia by repressing protein  
1186 phosphatase 6 in psoriasis. *Nat Commun* 6: 7652  
1187 Zhang Z, Zi Z, Lee EE, Zhao J, Contreras DC, South AP, Abel ED, Chong BF, Vandergriff T,  
1188 Hosler GA *et al* (2018) Differential glucose requirement in skin homeostasis and injury  
1189 identifies a therapeutic target for psoriasis. *Nat Med* 24: 617-627  
1190  
1191

Figure 1

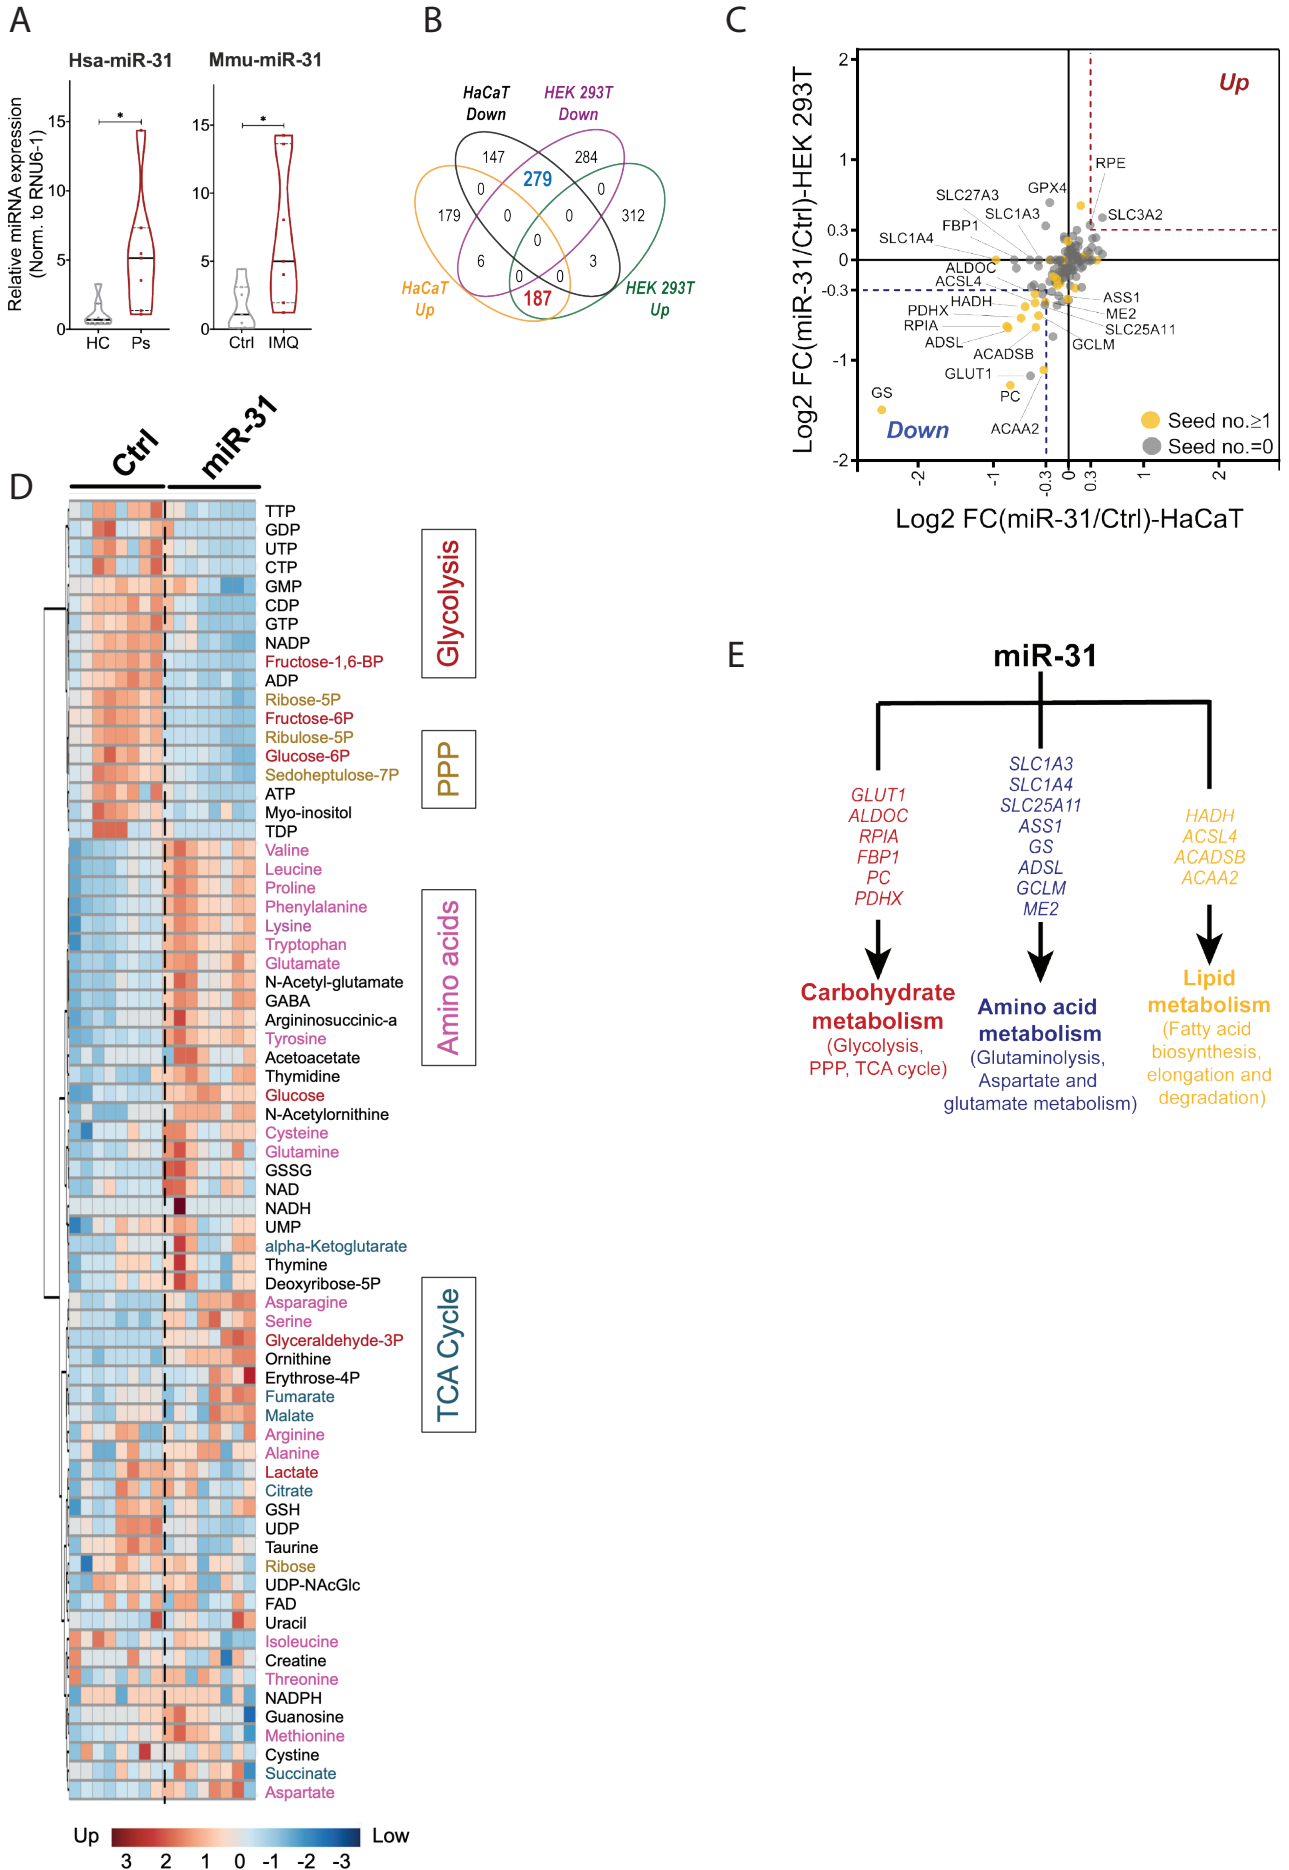

Figure 2

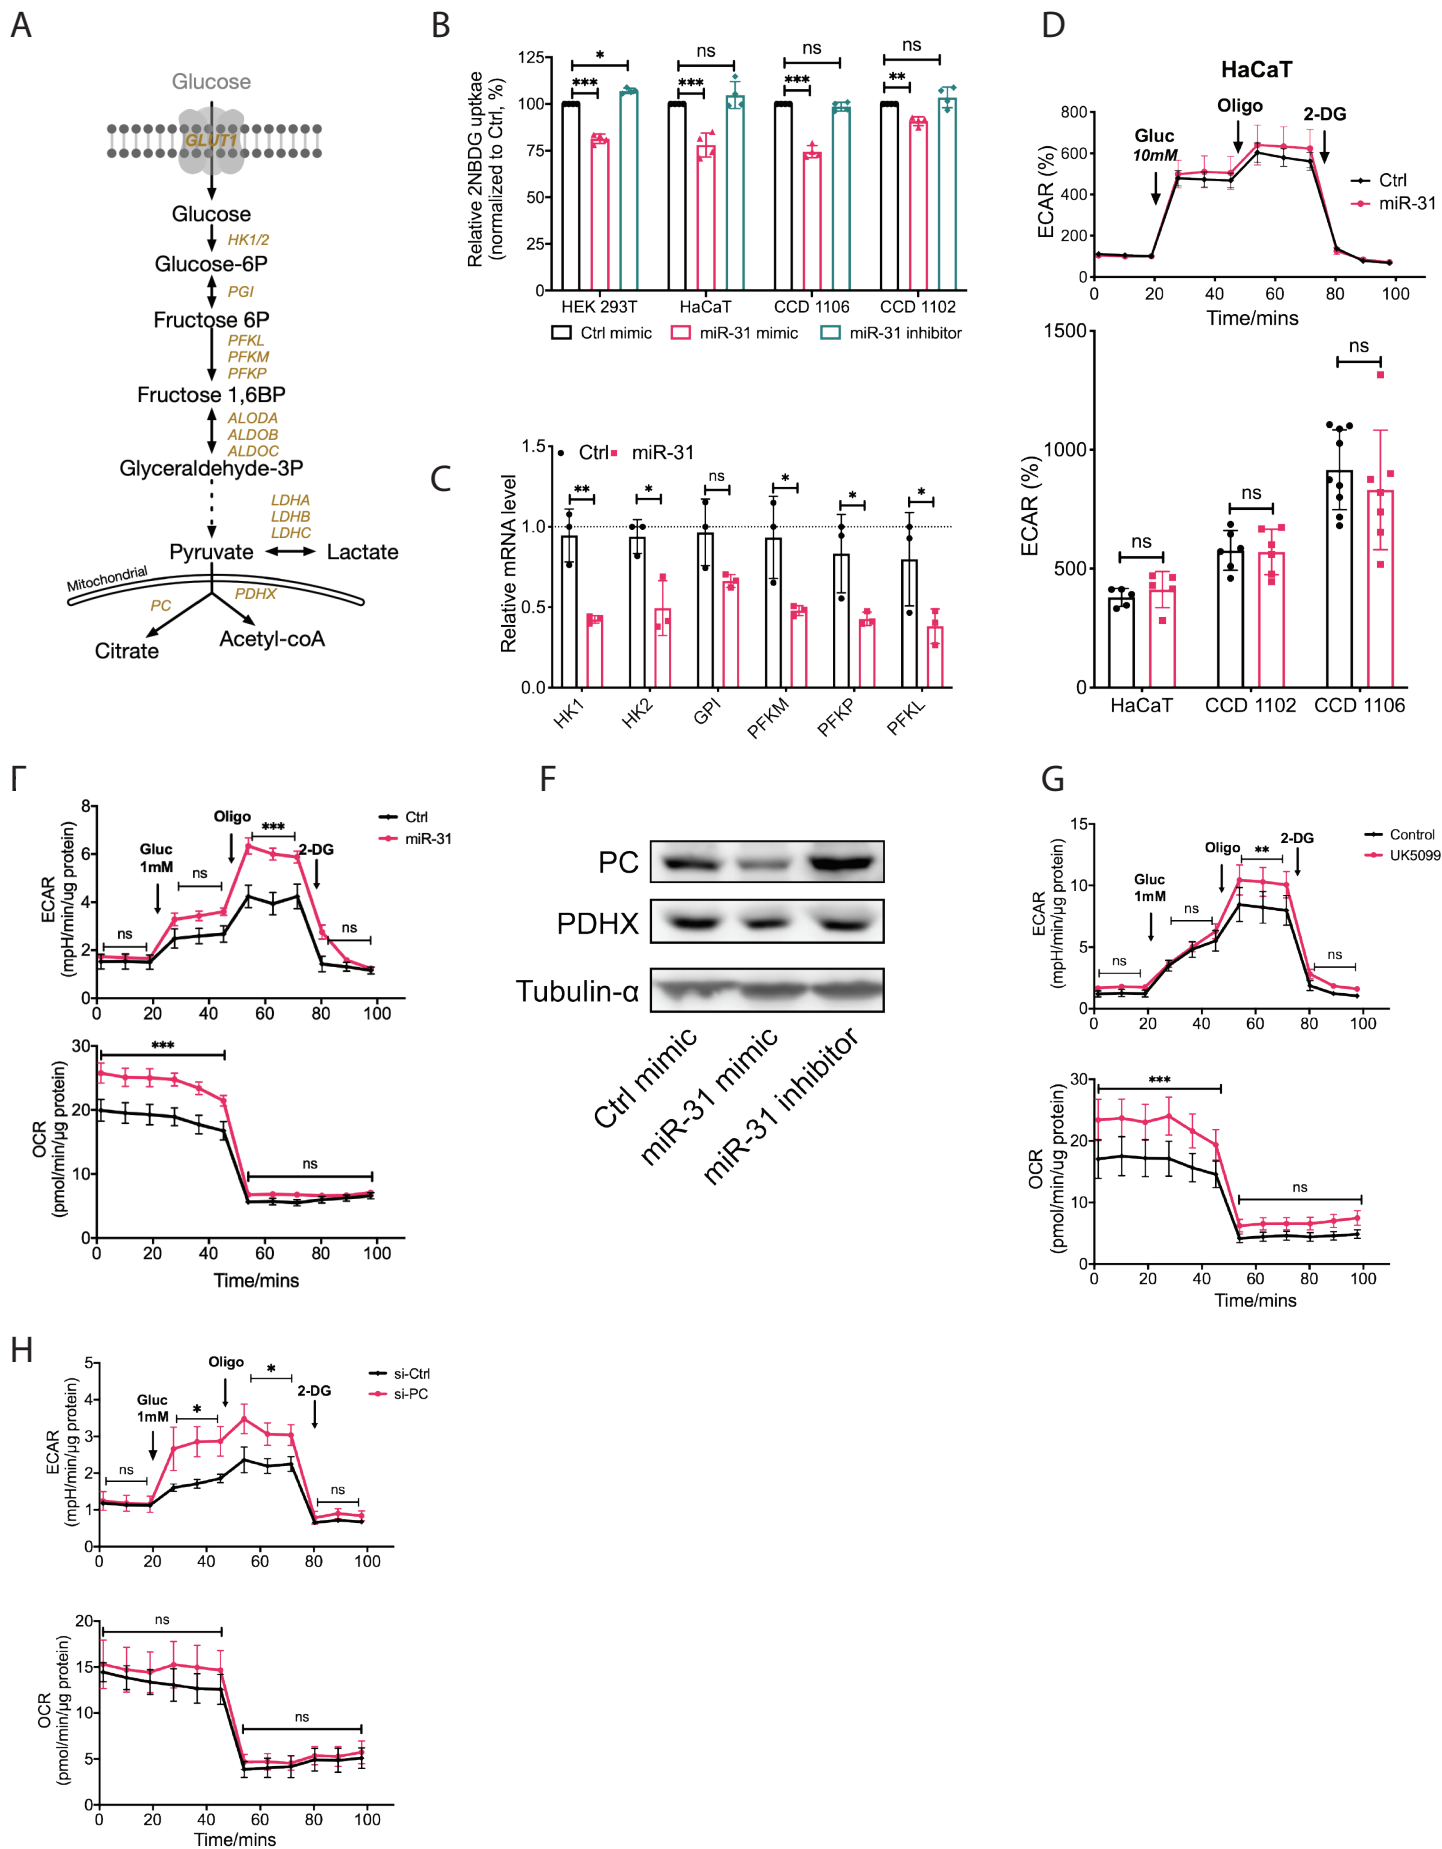

Figure 3

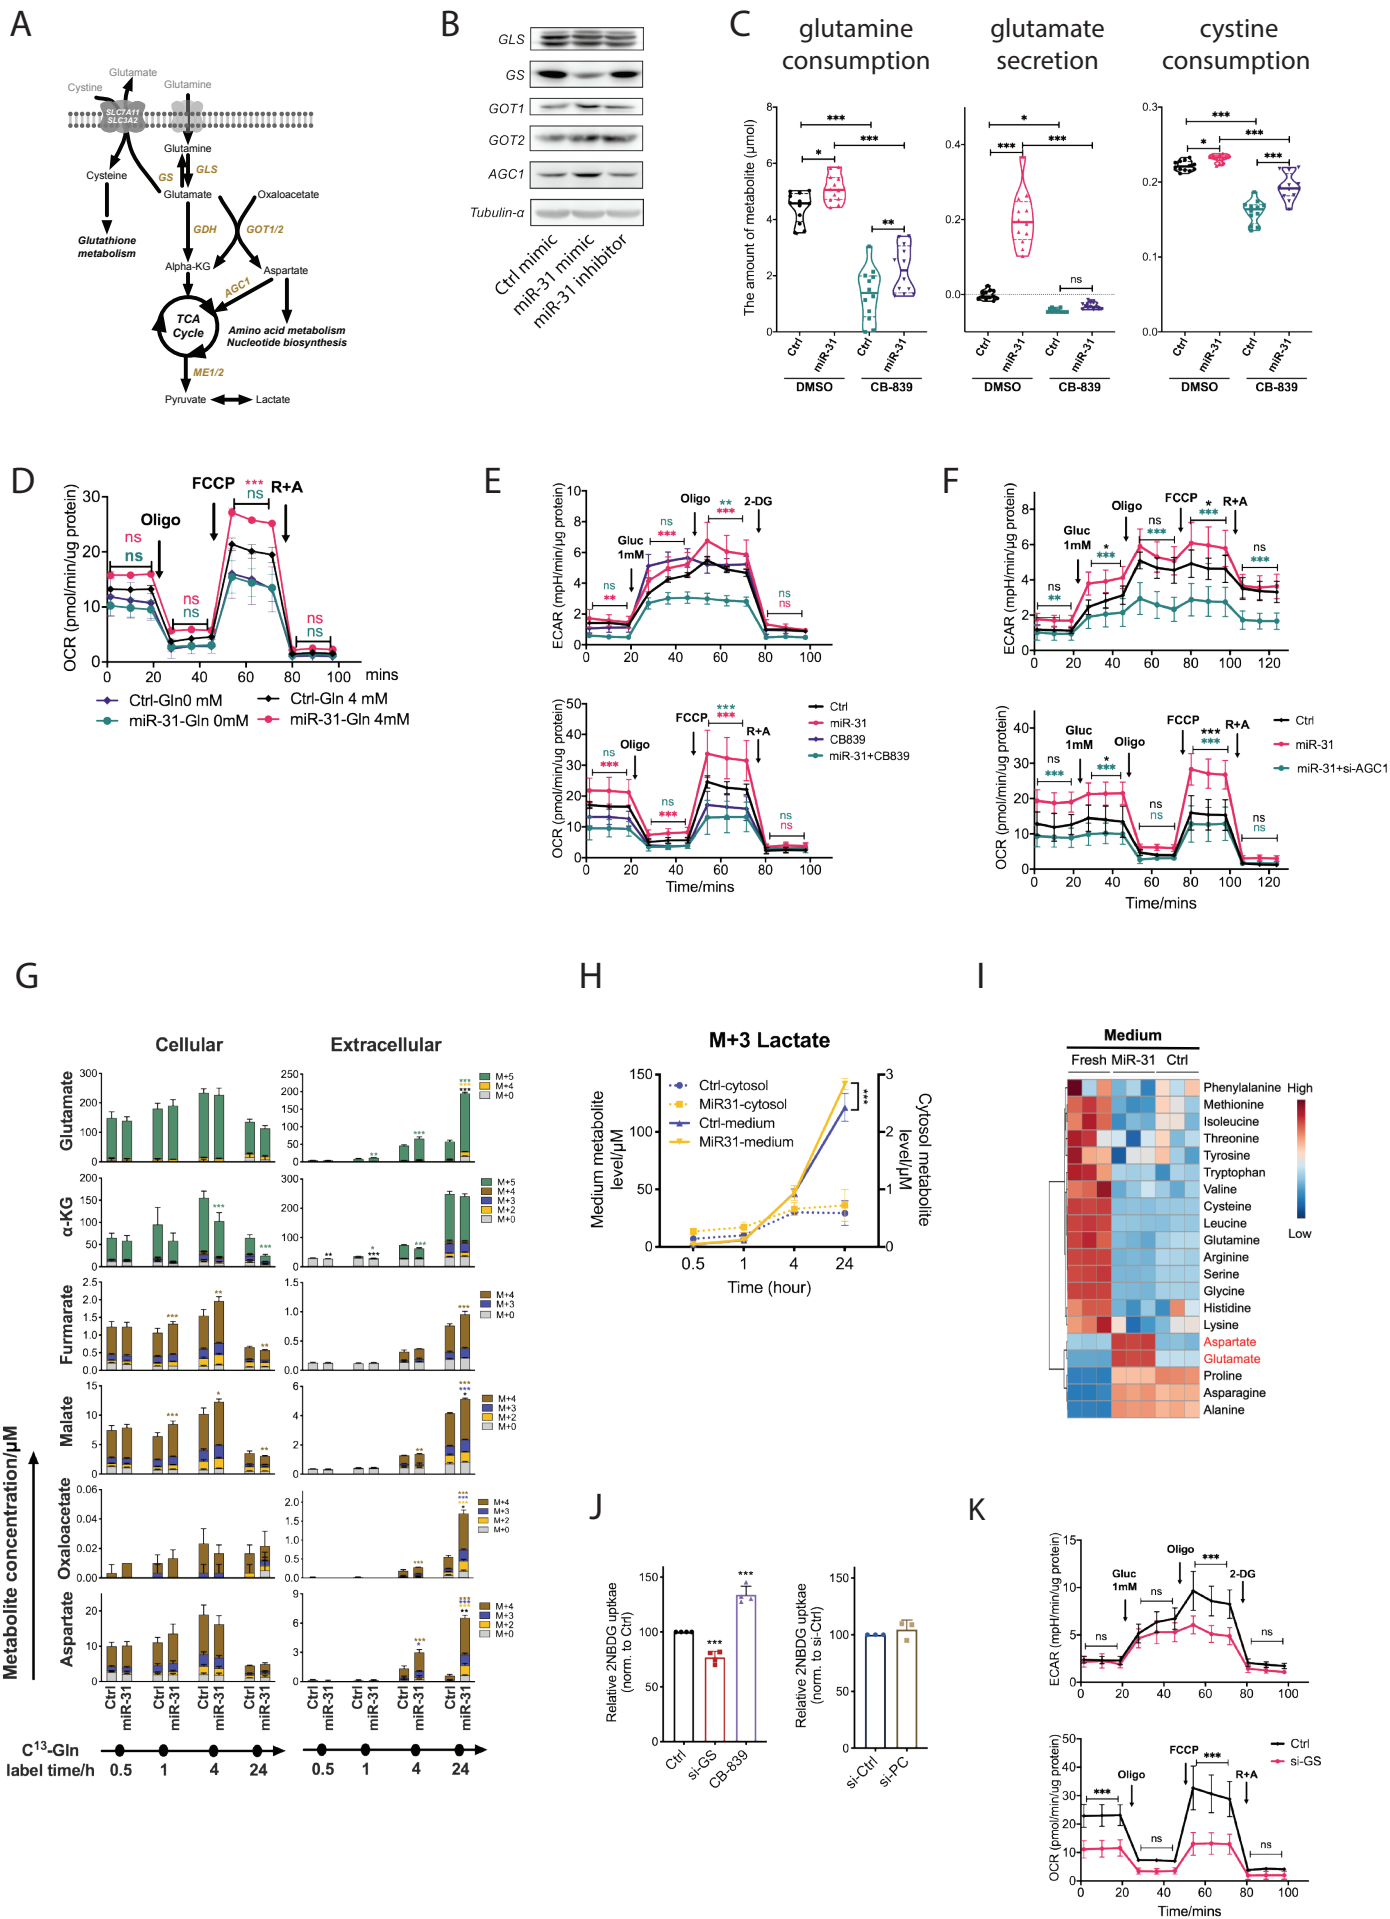

## Figure 4

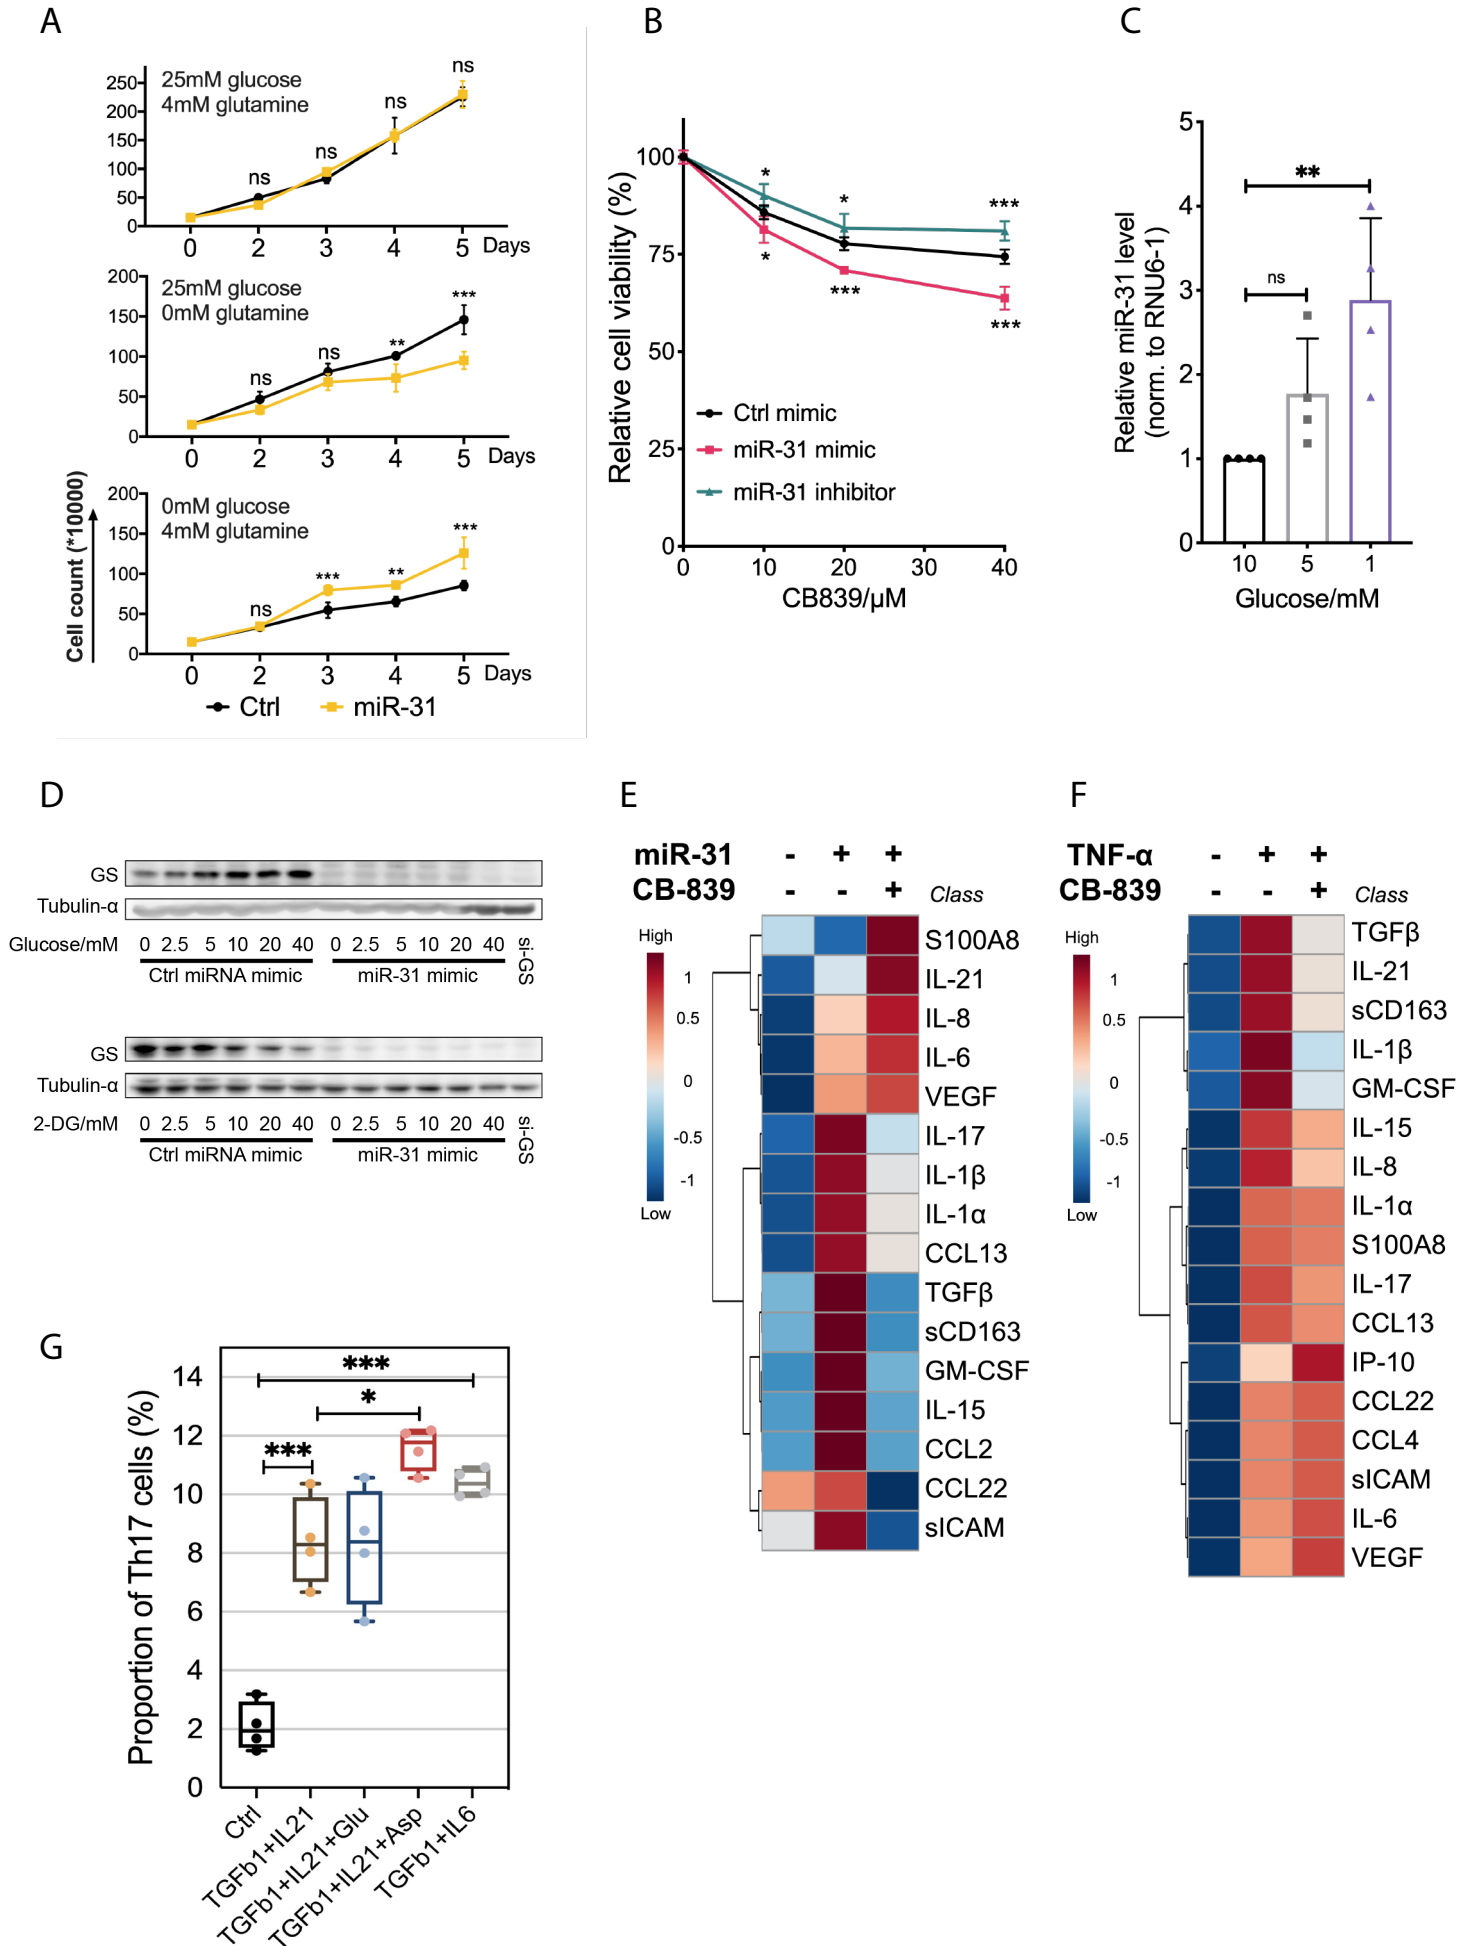

Figure 5

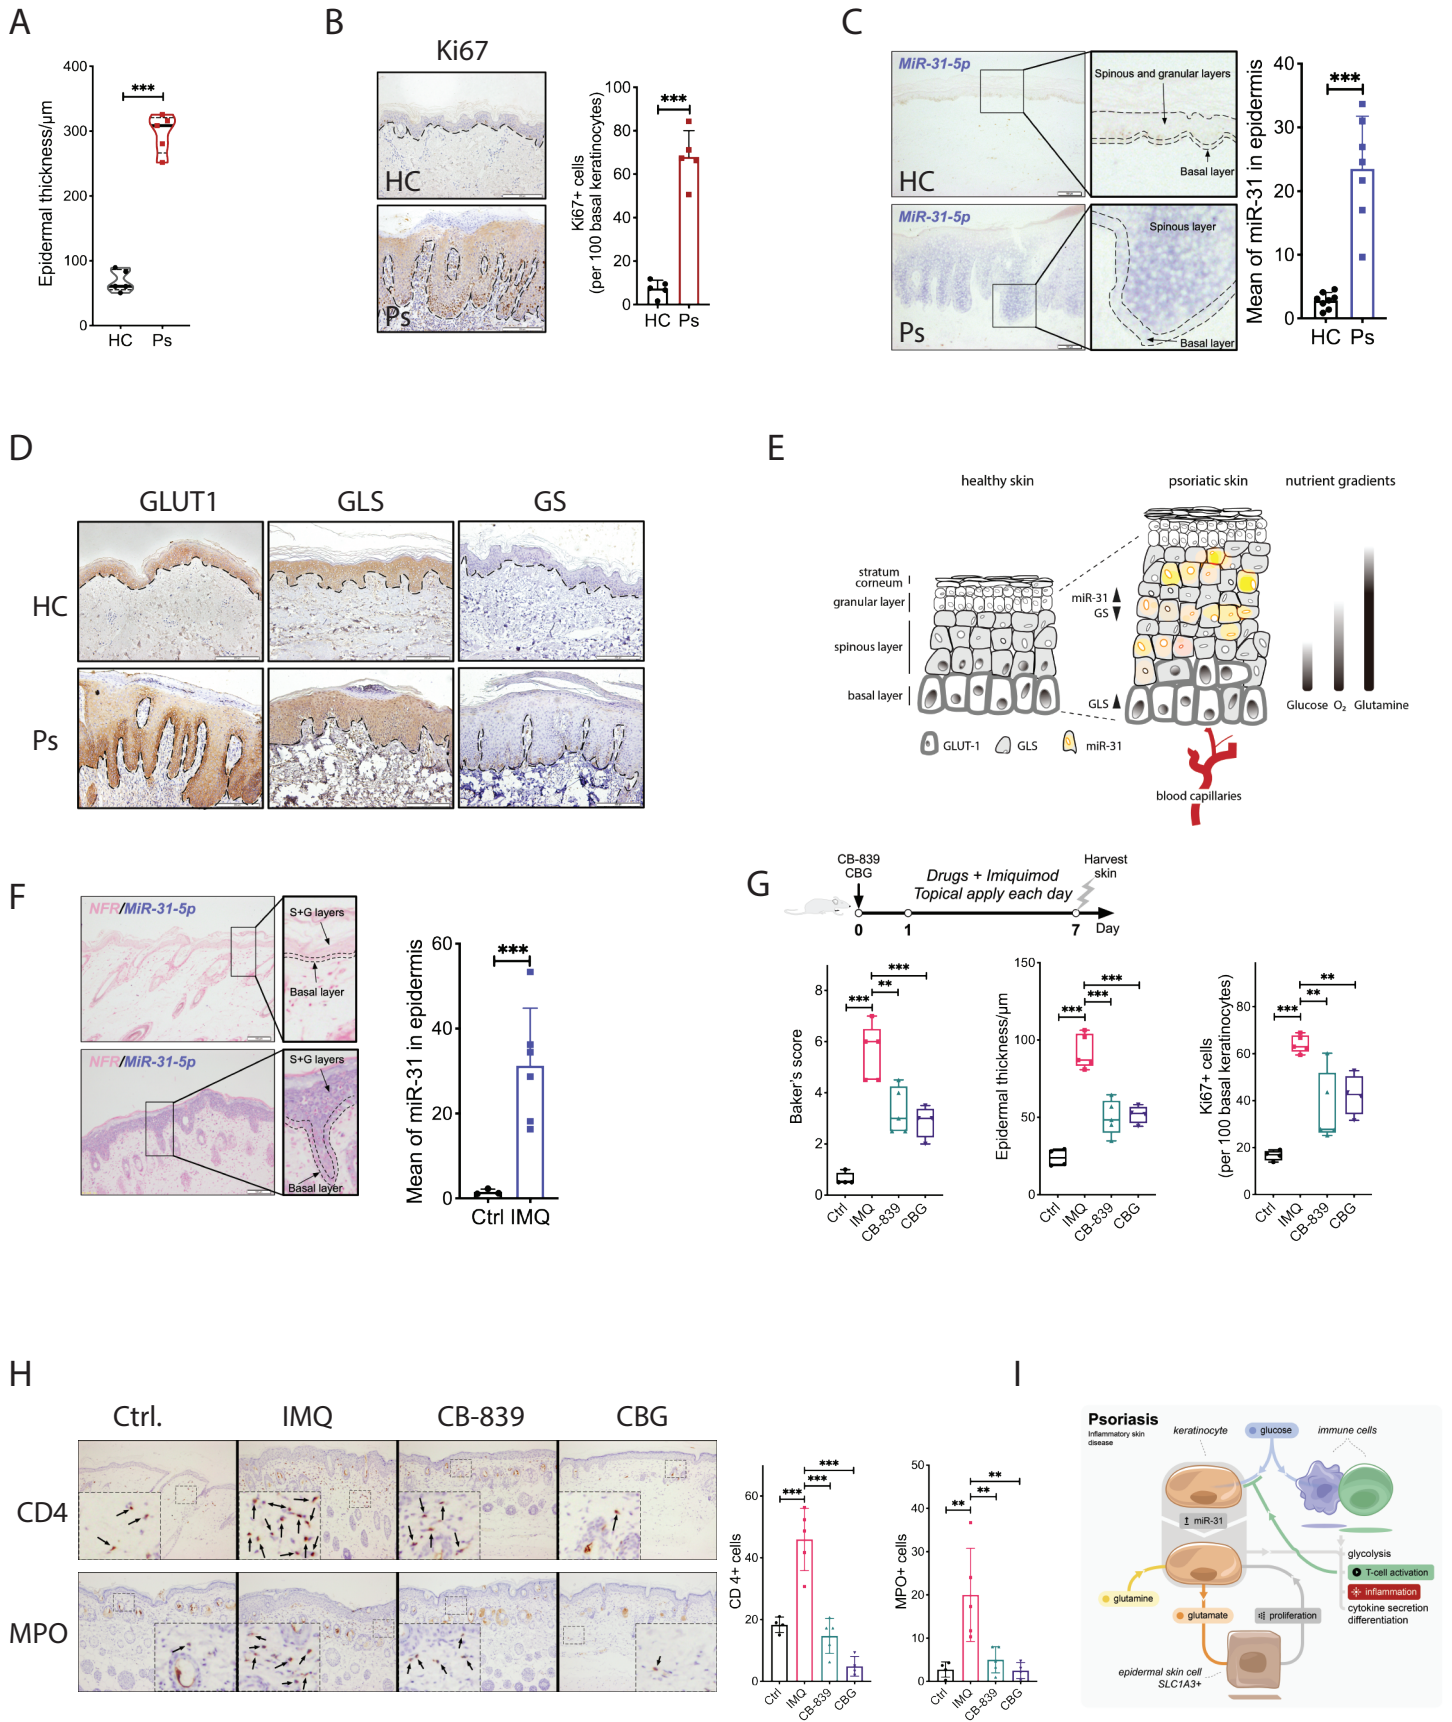

# Extended data figure 1

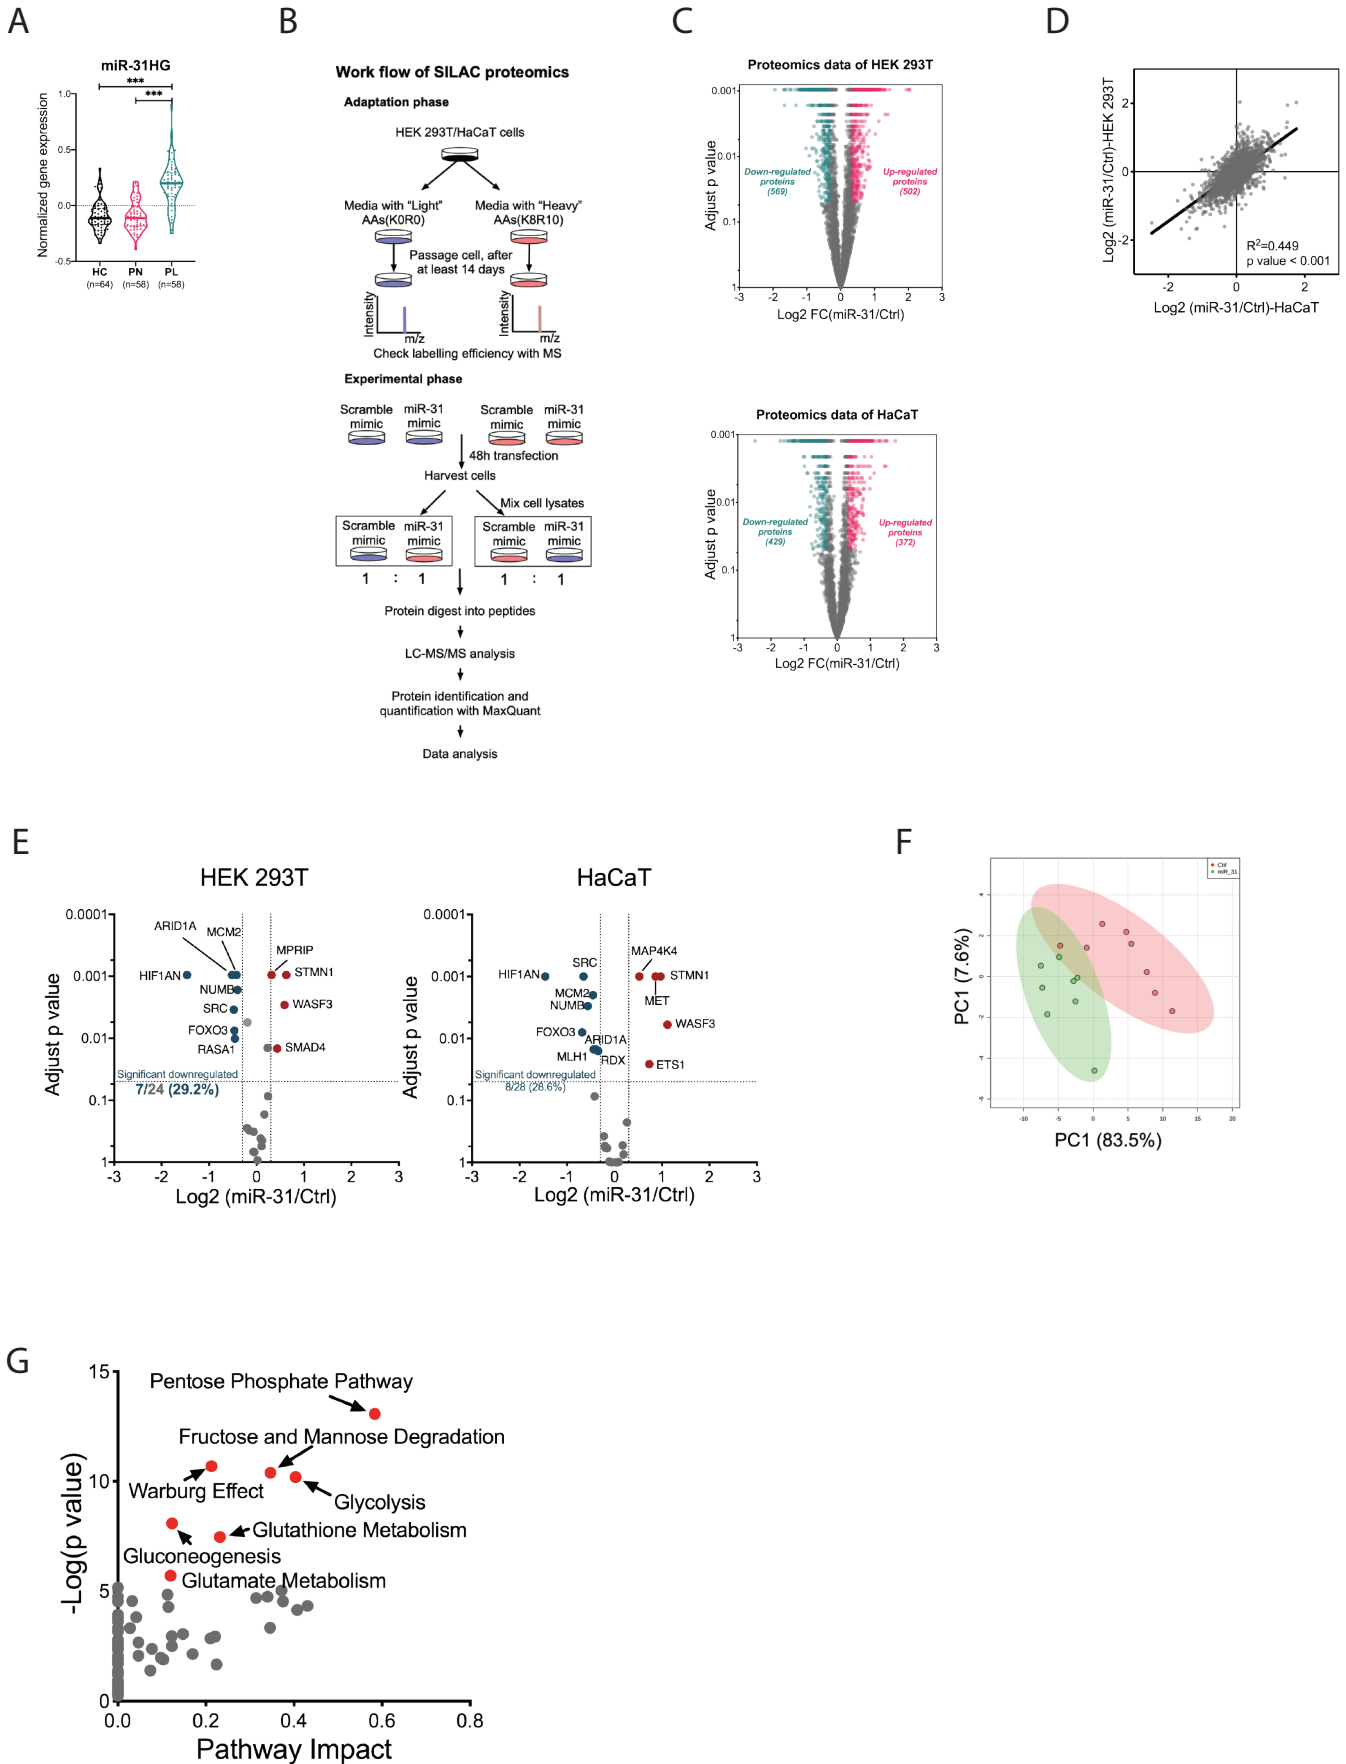

# Extended data figure 2

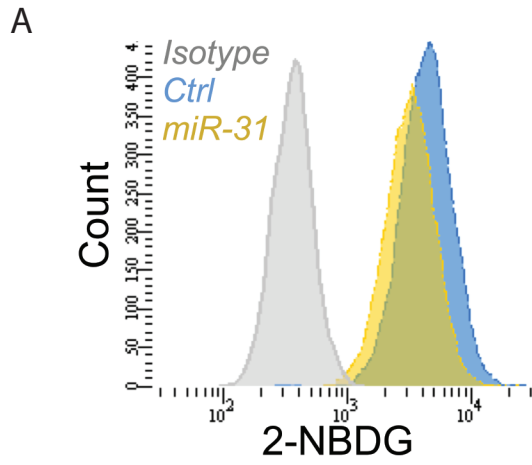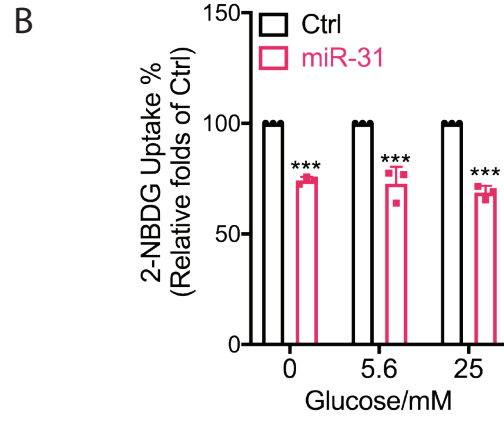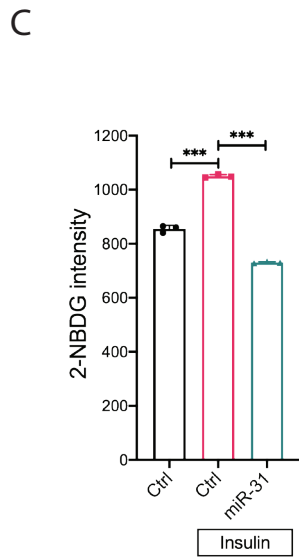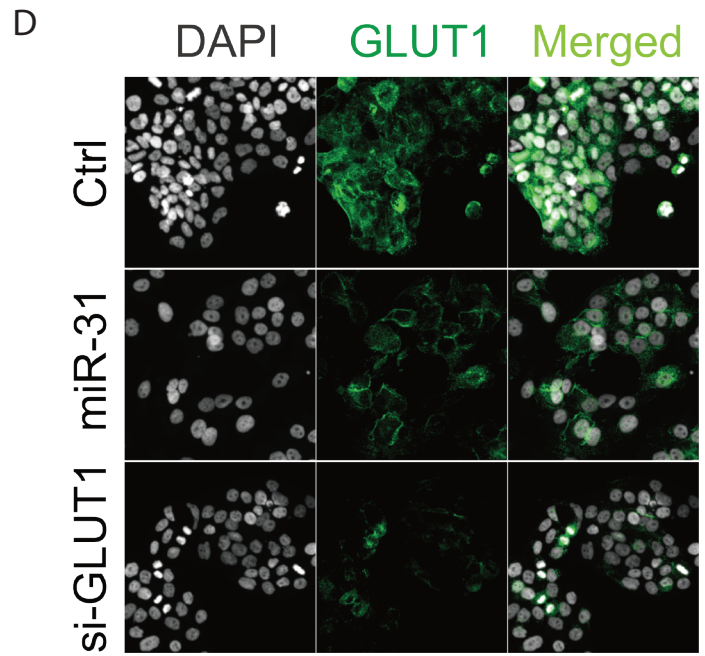



Extended data figure 3

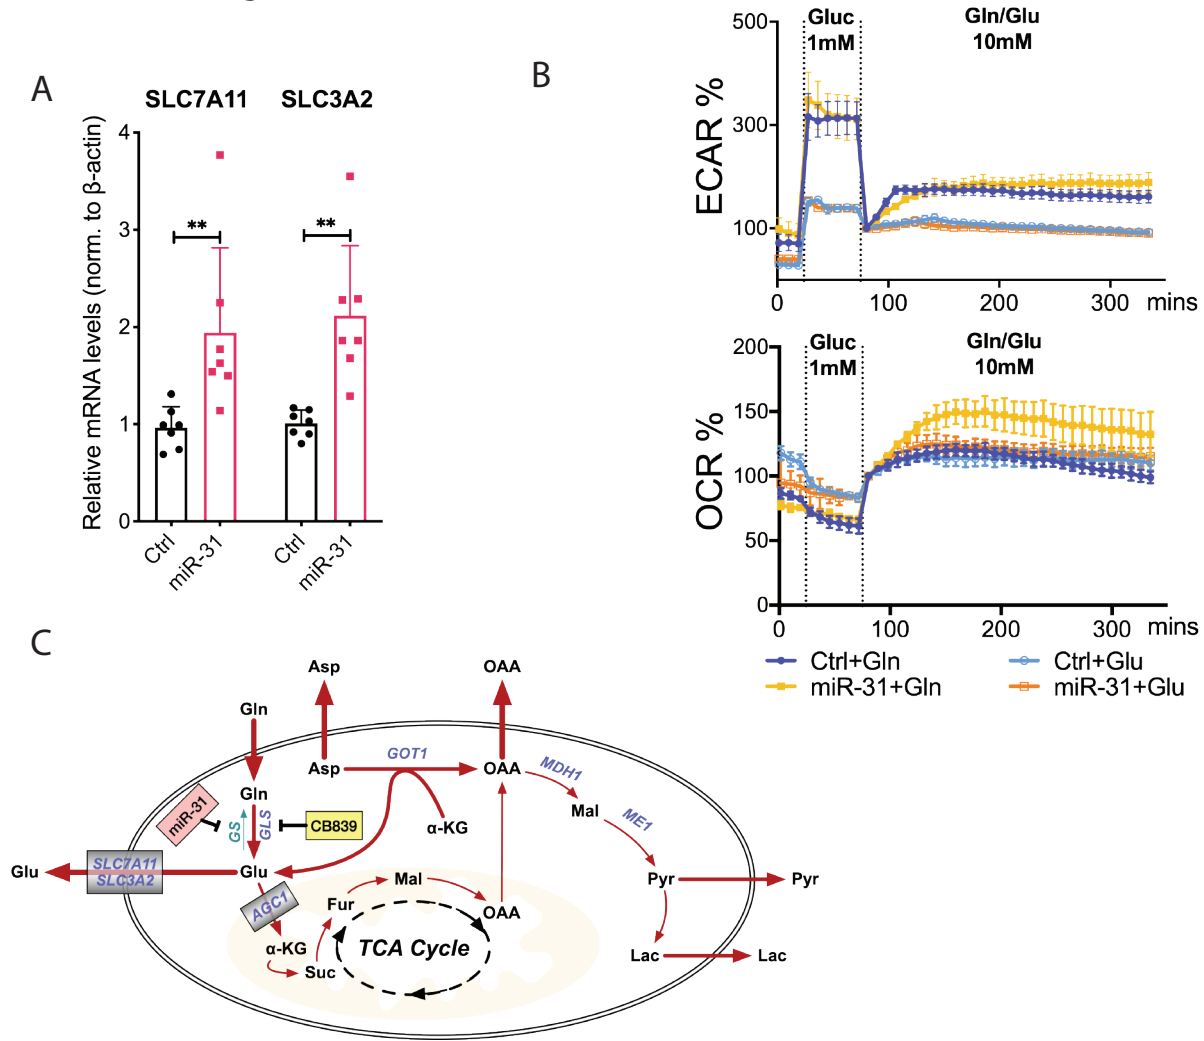

Extended data figure 4

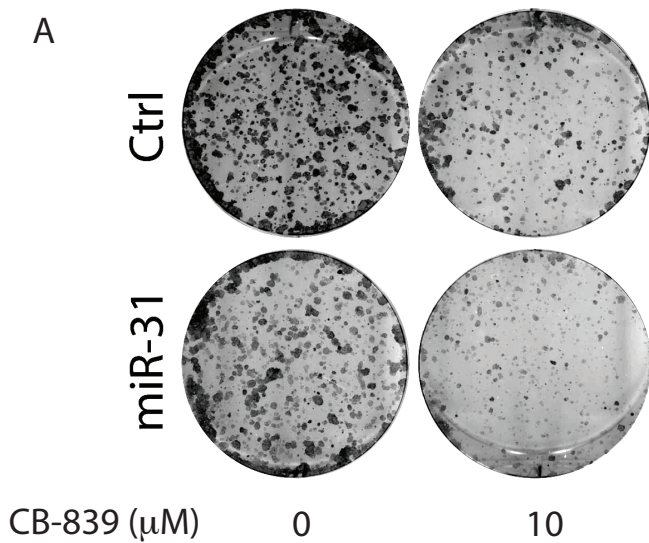

# Extended data figure 5

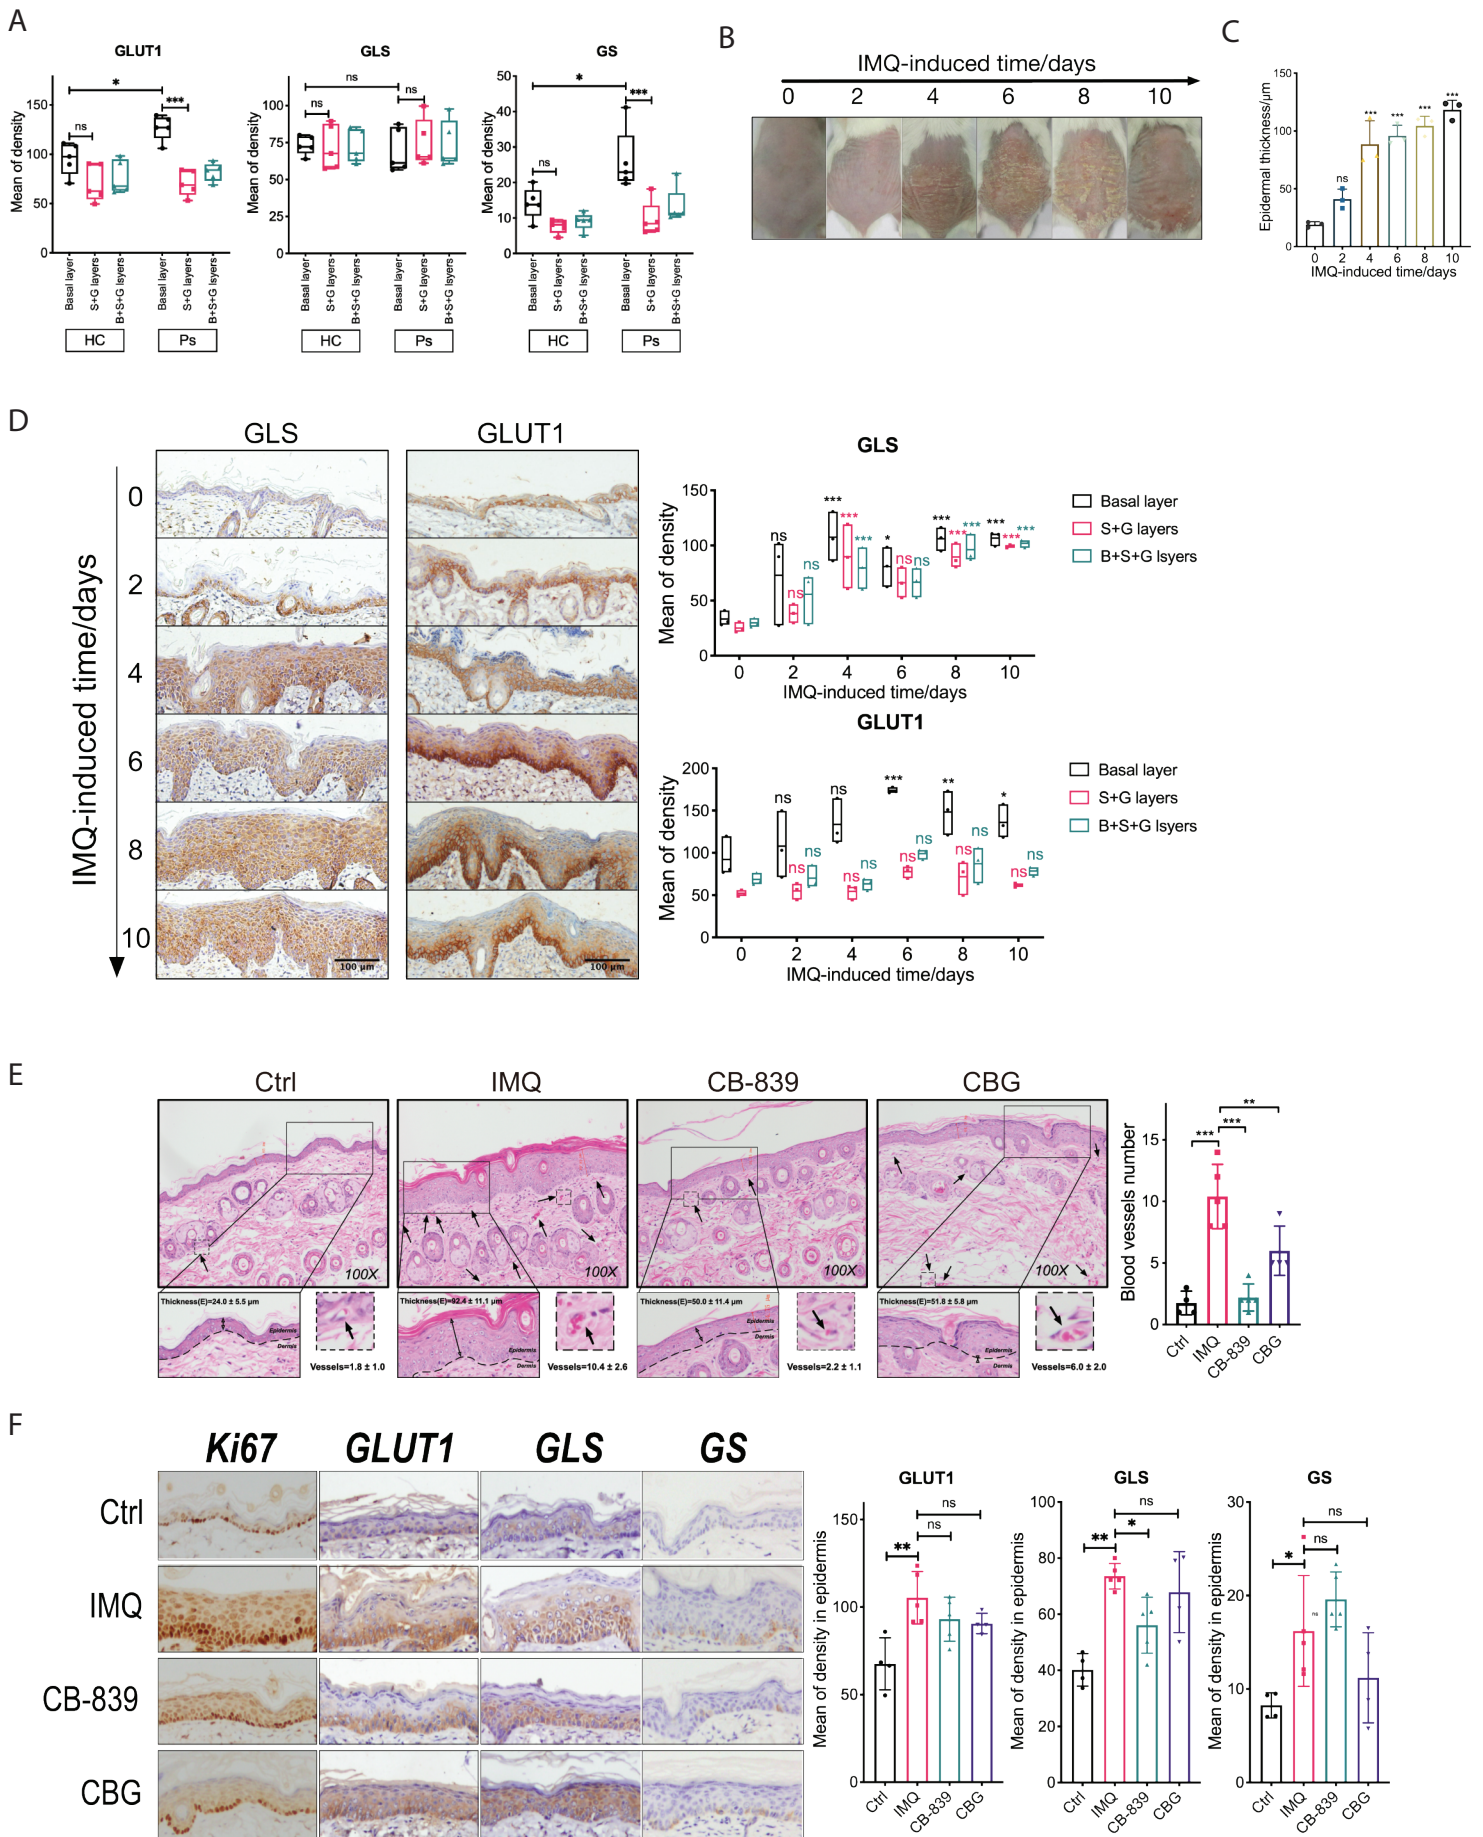

| <b>No.</b> | <b>Antibody</b>       | <b>Species</b> | <b>Dilution</b> | <b>Company</b> | <b>Cat No.</b> |
|------------|-----------------------|----------------|-----------------|----------------|----------------|
| 1          | GLUT1                 | Rabbit         | 1:200           | Abcam          | ab652          |
| 2          | GLS                   | Rabbit         | 1:200           | Abcam          | ab93434        |
| 3          | GLUL(GS)              | Rabbit         | 1:200           | CST            | 27857S         |
| 4          | Ki67                  | Rabbit         | 1:200           | Abcam          | Ab15580        |
| 5          | CD4                   | Rabbit         | 1:600           | Abcam          | ab183685       |
| 6          | Myeloperoxidase (MPO) | Rabbit         | 1:600           | Abcam          | ab208670       |

| Pathway name                                                               | Gene    | Seed number | HaCaT Proteomics adjust p value | fc (miR-31/adjust p value) | 293T Prc adjust p value |
|----------------------------------------------------------------------------|---------|-------------|---------------------------------|----------------------------|-------------------------|
|                                                                            | AGXT    | #N/A        | #N/A                            | #N/A                       | #N/A                    |
|                                                                            | AGXT2   | #N/A        | #N/A                            | #N/A                       | #N/A                    |
|                                                                            | GPT     | #N/A        | #N/A                            | #N/A                       | #N/A                    |
|                                                                            | GPT2    | 0           | 0,30618195                      | 0,15196384                 | 0,90889595              |
|                                                                            | ADSS1   | #N/A        | #N/A                            | #N/A                       | #N/A                    |
|                                                                            | ADSS2   | #N/A        | #N/A                            | #N/A                       | #N/A                    |
|                                                                            | ADSL    | 0           | 0,00123749                      | -0,8012147                 | 0,00095539              |
|                                                                            | ASS1    | 0           | 0,00211867                      | -0,34516                   | 0,0040258               |
|                                                                            | ASL     | 0           | 0,61038961                      | 0,17153467                 | #N/A                    |
|                                                                            | CAD     | 0           | 0,75499762                      | 0,0228881                  | 0,00095539              |
|                                                                            | NATBL   | #N/A        | #N/A                            | #N/A                       | #N/A                    |
|                                                                            | ASPA    | #N/A        | #N/A                            | #N/A                       | #N/A                    |
|                                                                            | RIMKLA  | #N/A        | #N/A                            | #N/A                       | #N/A                    |
|                                                                            | RIMKLB  | #N/A        | #N/A                            | #N/A                       | #N/A                    |
|                                                                            | FOLH1   | #N/A        | #N/A                            | #N/A                       | #N/A                    |
|                                                                            | ASNS    | 0           | 0,77831015                      | -0,041781                  | 0,26205803              |
|                                                                            | ASRGL1  | #N/A        | #N/A                            | #N/A                       | #N/A                    |
|                                                                            | NIT2    | 0           | 0,75271388                      | -0,0445998                 | 0,09101063              |
| <b>Alanine, aspartate and glutamate metabolism (KEGG pathway ID:00250)</b> | DDO     | #N/A        | #N/A                            | #N/A                       | #N/A                    |
|                                                                            | GOT1    | 0           | 0,03937908                      | 0,19785874                 | 0,83867315              |
|                                                                            | GOT2    | 0           | 0,73877876                      | 0,03960132                 | 0,8972126               |
|                                                                            | GFPT1   | 0           | 0,45467511                      | -0,0850757                 | 0,56130581              |
|                                                                            | GFPT2   | #N/A        | #N/A                            | #N/A                       | #N/A                    |
|                                                                            | PPAT    | 0           | 0,01104874                      | 0,31828615                 | 0,01218243              |
|                                                                            | CPS1    | #N/A        | #N/A                            | #N/A                       | #N/A                    |
|                                                                            | ALDH4A1 | 0           | 0,78279389                      | -0,0436932                 | 0,49219703              |
|                                                                            | GLS     | 0           | 0,11459942                      | -0,1658921                 | 0,00454021              |
|                                                                            | GLS2    | #N/A        | #N/A                            | #N/A                       | #N/A                    |
|                                                                            | GLUL    | 2           | 0,00123749                      | -2,4819342                 | 0,00095539              |
|                                                                            | ALDH5A1 | #N/A        | #N/A                            | #N/A                       | #N/A                    |
|                                                                            | ABAT    | #N/A        | #N/A                            | #N/A                       | #N/A                    |
|                                                                            | CAD1    | #N/A        | #N/A                            | #N/A                       | #N/A                    |
|                                                                            | CAD2    | #N/A        | #N/A                            | #N/A                       | #N/A                    |
|                                                                            | GLUD1   | #N/A        | #N/A                            | #N/A                       | #N/A                    |
|                                                                            | GLUD2   | #N/A        | #N/A                            | #N/A                       | #N/A                    |
|                                                                            | IL4I1   | #N/A        | #N/A                            | #N/A                       | #N/A                    |
|                                                                            | ME1     | 0           | 0,6759894                       | -0,0547864                 | 0,10003326              |
|                                                                            | ME2     | 1           | 0,00872686                      | -0,3070907                 | 0,00095539              |
|                                                                            | MDH1    | 0           | 0,93592405                      | 0,01508024                 | 0,11467675              |
|                                                                            | MDH2    | 0           | 0,24620958                      | 0,12998954                 | 0,087615                |
|                                                                            | GPX4    | 0           | 0,15676573                      | -0,2468004                 | 0,0040258               |
|                                                                            | GSR     | 0           | 0,00123749                      | -0,4558081                 | 0,01728931              |
|                                                                            | GPX1    | 0           | 0,87478984                      | 0,03041436                 | 0,26130794              |
|                                                                            | GPX3    | #N/A        | #N/A                            | #N/A                       | #N/A                    |
|                                                                            | GPX8    | 1           | 0,84354056                      | 0,04052358                 | 0,81353523              |
| <b>Glutathione metabolism</b>                                              | TXNDC12 | 0           | 0,7897162                       | 0,0585965                  | 0,14633367              |

**Glutathione metabolism  
(KEGG pathway  
ID:00480)**

|         |      |            |            |            |
|---------|------|------------|------------|------------|
| GSS     | 0    | 0,30107155 | -0,1302878 | 0,00095539 |
| GGT5    | #N/A | #N/A       | #N/A       | #N/A       |
| GCLC    | 0    | 0,24455515 | -0,1283178 | 0,2191751  |
| GCLM    | 1    | 0,03817952 | -0,3982541 | 0,00095539 |
| LAP3    | 0    | 0,78723765 | -0,0330708 | 0,13751494 |
| ANPEP   | #N/A | #N/A       | #N/A       | #N/A       |
| PSAT1   | 0    | 0,0223091  | -0,2479944 | 0,01259149 |
| GPT2    | 0    | 0,30618195 | 0,15196384 | 0,90889595 |
| HK1     | 0    | 0,00123749 | 0,28087951 | 0,345284   |
| HK2     | 1    | 0,00123749 | 0,37489727 | 0,98384787 |
| HK3     | #N/A | #N/A       | #N/A       | #N/A       |
| HKDC1   | #N/A | #N/A       | #N/A       | #N/A       |
| GCK     | #N/A | #N/A       | #N/A       | #N/A       |
| ADPGK   | 0    | 0,99366351 | -0,0017636 | 0,6430681  |
| GPI     | 1    | 0,27274247 | -0,1056    | 0,00165366 |
| PFKL    | 0    | 0,09968338 | -0,1755129 | 0,01259149 |
| PFKM    | 0    | 0,22859846 | 0,11880014 | 0,78132471 |
| PFKP    | 0    | 0,00123749 | 0,28354438 | 0,89804753 |
| ALDOA   | 0    | 0,00123749 | -0,4893589 | 0,00095539 |
| ALDOB   | #N/A | #N/A       | #N/A       | #N/A       |
| ALDOC   | 1    | 0,00123749 | -0,4451367 | 0,00555944 |
| TPI1    | 0    | 0,79263258 | 0,03545366 | 0,90730616 |
| GAPDH5  | #N/A | #N/A       | #N/A       | #N/A       |
| GAPDH   | 0    | 0,56263539 | -0,0624632 | 0,82336745 |
| PGK1    | 0    | 0,98075272 | -0,003023  | 0,34942164 |
| PGK2    | #N/A | #N/A       | #N/A       | #N/A       |
| PGAM1   | 0    | 0,64346962 | 0,06056727 | 0,46510455 |
| PGAM2   | #N/A | #N/A       | #N/A       | #N/A       |
| PGAM5   | 0    | 0,4794159  | 0,09553687 | 0,7955069  |
| BPGM    | 0    | 0,22433467 | -0,3033037 | 0,03152281 |
| ENO1    | 0    | 0,26205508 | 0,09519779 | 0,22075258 |
| ENO2    | 0    | 0,99473449 | 0,00119804 | 0,00095539 |
| ENO3    | #N/A | #N/A       | #N/A       | #N/A       |
| PKLR    | #N/A | #N/A       | #N/A       | #N/A       |
| PKM1    | #N/A | #N/A       | #N/A       | #N/A       |
| PKM2    | #N/A | #N/A       | #N/A       | #N/A       |
| LDHAL6A | #N/A | #N/A       | #N/A       | #N/A       |
| LDHAL6B | #N/A | #N/A       | #N/A       | #N/A       |
| LDHA    | 0    | 0,09064706 | 0,15880775 | 0,95464032 |
| LDHB    | 0    | 0,7381641  | 0,0438792  | 0,87056695 |
| LDHC    | #N/A | #N/A       | #N/A       | #N/A       |
| LDHD    | #N/A | #N/A       | #N/A       | #N/A       |
| PFKFB1  | #N/A | #N/A       | #N/A       | #N/A       |
| PFKFB2  | 1    | 0,93576021 | 0,01279242 | 0,83768382 |
| PFKFB3  | 1    | 0,5004521  | 0,09102775 | 0,13992222 |
| PFKFB4  | #N/A | #N/A       | #N/A       | #N/A       |
| G6PD    | 0    | 0,01050663 | -0,2165965 | 0,07827634 |
| PGLS    | 0    | 0,75478306 | -0,0532618 | 0,49301133 |

**Glycolysis(KEGG  
pathway ID:00010)**

|                                                          |         |            |            |            |            |
|----------------------------------------------------------|---------|------------|------------|------------|------------|
|                                                          | PGD     | 0          | 0,15530517 | -0,1562018 | 0,01504004 |
|                                                          | H6PD    | 1          | 0,26873127 | -0,2503199 | #N/A       |
|                                                          | RPIA    | 1          | 0,00123749 | -0,8189028 | 0,00165366 |
|                                                          | RPE     | 0          | 0,24455515 | 0,28857192 | 0,05537099 |
|                                                          | RPEL1   | #N/A       | #N/A       | #N/A       | #N/A       |
|                                                          | TKT     | 1          | 0,78956655 | -0,0267608 | 0,99323502 |
|                                                          | TKTL1   | #N/A       | #N/A       | #N/A       | #N/A       |
|                                                          | TKTL2   | #N/A       | #N/A       | #N/A       | #N/A       |
| <b>Pentose phosphate pathway (KEGG pathway ID:00030)</b> | RBKS    | #N/A       | #N/A       | #N/A       | #N/A       |
|                                                          | PGM1    | 0          | 0,00123749 | 0,45055585 | 0,4527128  |
|                                                          | PGM2    | 0          | 0,47894854 | -0,0828059 | 0,00095539 |
|                                                          | PRPS1   | 0          | 0,20987864 | 0,17652774 | 0,83205383 |
|                                                          | PRPS1L1 | #N/A       | #N/A       | #N/A       | #N/A       |
|                                                          | PRPS2   | 0          | 0,88356307 | 0,02582295 | 0,29885337 |
|                                                          | FBP1    | 0          | 0,001998   | -0,7195246 | #N/A       |
|                                                          | FBP2    | #N/A       | #N/A       | #N/A       | #N/A       |
|                                                          | DERA    | 0          | 0,87605799 | -0,0297466 | 0,49747439 |
|                                                          | GLYCTK  | #N/A       | #N/A       | #N/A       | #N/A       |
|                                                          | RGN     | #N/A       | #N/A       | #N/A       | #N/A       |
|                                                          | IDNK    | #N/A       | #N/A       | #N/A       | #N/A       |
|                                                          | PC      | 2          | 0,00123749 | -0,7708335 | 0,00095539 |
|                                                          | PDHA1   | 1          | 0,91505529 | 0,01569451 | 0,99601854 |
|                                                          | PDHA2   | #N/A       | #N/A       | #N/A       | #N/A       |
|                                                          | PDHB    | 0          | 0,75861382 | 0,05482991 | 0,40316755 |
|                                                          | PDHX    | 1          | 0,00123749 | -0,6296849 | 0,00095539 |
|                                                          | DLAT    | 0          | 0,8015734  | 0,03448834 | 0,29037404 |
|                                                          | CS      | 0          | 0,97969625 | -0,0052533 | 0,75714793 |
|                                                          | ACLY    | 0          | 0,0718722  | -0,1277599 | 0,00165366 |
|                                                          | ACO1    | #N/A       | #N/A       | #N/A       | #N/A       |
|                                                          | ACO2    | 0          | 0,46176677 | 0,0681901  | 0,11432841 |
|                                                          | IDH1    | 0          | 0,00123749 | -0,3969049 | 0,47358511 |
|                                                          | IDH2    | 0          | 0,57042777 | -0,0758107 | 0,06976073 |
|                                                          | IDH3A   | 0          | 0,00123749 | 0,39943525 | 0,3401971  |
| IDH3B                                                    | 1       | 0,05835711 | 0,22163491 | 0,68707516 |            |
| <b>Citrate cycle (TCA cycle) (KEGG pathway ID:00020)</b> | IDH3G   | 0          | 0,08040062 | 0,26639138 | 0,9890087  |
|                                                          | OGDH    | 0          | 0,97314531 | -0,0042277 | 0,79979286 |
|                                                          | OGDHL   | #N/A       | #N/A       | #N/A       | #N/A       |
|                                                          | SUCLA2  | 0          | 0,35962723 | 0,1179601  | 0,74760735 |
|                                                          | SUCLG1  | 0          | 0,75271388 | 0,05555814 | 0,61380839 |
|                                                          | SUCLG2  | 0          | 0,66682701 | 0,05901435 | 0,97382344 |
|                                                          | SDHA    | 1          | 0,52990695 | -0,0810409 | 0,1729205  |
|                                                          | SDHB    | 0          | 0,52768688 | 0,10291917 | 0,10805377 |
|                                                          | SDHC    | #N/A       | #N/A       | #N/A       | #N/A       |
|                                                          | SDHD    | #N/A       | #N/A       | #N/A       | #N/A       |
|                                                          | FH      | 0          | 0,56577279 | 0,06865307 | 0,47122374 |
|                                                          | SDHAF1  | #N/A       | #N/A       | #N/A       | #N/A       |
|                                                          | SDHAF2  | 0          | 0,39936282 | -0,2058305 | 0,01762068 |
|                                                          | SDHAF3  | #N/A       | #N/A       | #N/A       | #N/A       |

|                                                                                        |          |      |            |            |            |
|----------------------------------------------------------------------------------------|----------|------|------------|------------|------------|
|                                                                                        | SDHAF4   | #N/A | #N/A       | #N/A       | #N/A       |
|                                                                                        | DLST     | 0    | 0,7866147  | 0,04653383 | 0,5559902  |
|                                                                                        | DLD      | 0    | 0,52130433 | 0,08667521 | 0,58974445 |
|                                                                                        | ACADL    | #N/A | #N/A       | #N/A       | #N/A       |
|                                                                                        | ACADM    | 0    | 0,33790646 | -0,1515645 | 0,00095539 |
|                                                                                        | ACADVL   | 0    | 0,22507997 | -0,1118473 | 0,10741855 |
|                                                                                        | ACOX1    | 1    | 0,26902247 | -0,1555892 | 0,16445903 |
|                                                                                        | ACOX3    | 0    | 0,48213892 | 0,17558089 | 0,22781111 |
|                                                                                        | ACSL1    | 0    | 0,07819863 | -0,2214033 | 0,01061348 |
|                                                                                        | ACSL3    | 0    | 0,78422684 | 0,03067692 | 0,1178239  |
|                                                                                        | ACSL4    | 1    | 0,00123749 | -0,4415893 | 0,00095539 |
|                                                                                        | ACSL5    | #N/A | #N/A       | #N/A       | #N/A       |
|                                                                                        | ACSL6    | #N/A | #N/A       | #N/A       | #N/A       |
|                                                                                        | ACSBG1   | #N/A | #N/A       | #N/A       | #N/A       |
|                                                                                        | ACSBG2   | #N/A | #N/A       | #N/A       | #N/A       |
|                                                                                        | HSD17B12 | 0    | 0,73207866 | -0,0583813 | 0,14706845 |
|                                                                                        | ACAA1    | 0    | 0,98046906 | -0,0047459 | 0,4362955  |
|                                                                                        | ACAA2    | 1    | 0,13095618 | -0,3252972 | 0,00095539 |
|                                                                                        | HADH     | 2    | 0,00211867 | -0,5745208 | 0,00095539 |
|                                                                                        | HADHA    | 0    | 0,01104874 | -0,1900012 | 0,10762421 |
|                                                                                        | HADHB    | 1    | 0,05082104 | -0,2024899 | 0,0381392  |
| <b>Fatty acid metabolism<br/>(KEGG pathway<br/>ID:01212)</b>                           | EHHADH   | 0    | 0,01508169 | -0,3488401 | 0,09145816 |
|                                                                                        | ACADS    | #N/A | #N/A       | #N/A       | #N/A       |
|                                                                                        | ACADSB   | 2    | 0,00812921 | -0,43235   | 0,00095539 |
|                                                                                        | MECR     | 1    | 0,98075272 | -0,0076122 | 0,14145745 |
|                                                                                        | ACACA    | 0    | 0,03122231 | 0,14034273 | 0,00798084 |
|                                                                                        | FASN     | 0    | 0,29690461 | 0,05181364 | 0,31963973 |
|                                                                                        | OXSM     | 0    | 0,27052341 | 0,25338059 | 0,52337888 |
|                                                                                        | MCAT     | 0    | 0,00436993 | 0,36549425 | 0,03414128 |
|                                                                                        | ELOVL1   | #N/A | #N/A       | #N/A       | #N/A       |
|                                                                                        | ELOVL2   | #N/A | #N/A       | #N/A       | #N/A       |
|                                                                                        | ELOVL3   | #N/A | #N/A       | #N/A       | #N/A       |
|                                                                                        | ELOVL4   | #N/A | #N/A       | #N/A       | #N/A       |
|                                                                                        | ELOVL5   | #N/A | #N/A       | #N/A       | #N/A       |
|                                                                                        | ELOVL6   | #N/A | #N/A       | #N/A       | #N/A       |
| ELOVL7                                                                                 | #N/A     | #N/A | #N/A       | #N/A       |            |
|                                                                                        | HACD1    | #N/A | #N/A       | #N/A       | #N/A       |
|                                                                                        | HACD2    | #N/A | #N/A       | #N/A       | #N/A       |
|                                                                                        | HACD3    | #N/A | #N/A       | #N/A       | #N/A       |
|                                                                                        | HACD4    | #N/A | #N/A       | #N/A       | #N/A       |
|                                                                                        | TECR     | 0    | 0,94565657 | -0,0176424 | 0,92432818 |
|                                                                                        | ACACB    | #N/A | #N/A       | #N/A       | #N/A       |
| <b>high-<br/>affinity<br/>glutamate<br/>and neutral<br/>amino acid<br/>transporter</b> | SLC1A1   | #N/A | #N/A       | #N/A       | #N/A       |
|                                                                                        | SLC1A2   | #N/A | #N/A       | #N/A       | #N/A       |
|                                                                                        | SLC1A3   | 0    | 0,08991009 | -0,3921572 | #N/A       |
|                                                                                        | SLC1A4   | 2    | 0,00599401 | -0,9648062 | #N/A       |
|                                                                                        | SLC1A5   | 0    | 0,45050095 | 0,11337035 | 0,04028199 |
|                                                                                        | SLC1A6   | #N/A | #N/A       | #N/A       | #N/A       |

|                                    |                                                                 |            |            |            |            |            |
|------------------------------------|-----------------------------------------------------------------|------------|------------|------------|------------|------------|
| <b>transporter</b>                 | SLC1A7                                                          | #N/A       | #N/A       | #N/A       | #N/A       |            |
|                                    | SLC2A1                                                          | 0          | 0,01794576 | -0,5045235 | 0,00095539 |            |
|                                    | SLC2A2                                                          | #N/A       | #N/A       | #N/A       | #N/A       |            |
|                                    | SLC2A3                                                          | #N/A       | #N/A       | #N/A       | #N/A       |            |
|                                    | SLC2A4                                                          | #N/A       | #N/A       | #N/A       | #N/A       |            |
|                                    | SLC2A5                                                          | #N/A       | #N/A       | #N/A       | #N/A       |            |
|                                    | SLC2A6                                                          | #N/A       | #N/A       | #N/A       | #N/A       |            |
|                                    | <b>facilitative GLUT transporter</b>                            | SLC2A7     | #N/A       | #N/A       | #N/A       | #N/A       |
|                                    |                                                                 | SLC2A8     | #N/A       | #N/A       | #N/A       | #N/A       |
|                                    |                                                                 | SLC2A9     | #N/A       | #N/A       | #N/A       | #N/A       |
|                                    |                                                                 | SLC2A10    | #N/A       | #N/A       | #N/A       | #N/A       |
|                                    |                                                                 | SLC2A11    | #N/A       | #N/A       | #N/A       | #N/A       |
|                                    |                                                                 | SLC2A12    | #N/A       | #N/A       | #N/A       | #N/A       |
|                                    |                                                                 | SLC2A13    | #N/A       | #N/A       | #N/A       | #N/A       |
| <b>heavy subunits of</b>           | SLC2A14                                                         | #N/A       | #N/A       | #N/A       | #N/A       |            |
|                                    | SLC3A1                                                          | #N/A       | #N/A       | #N/A       | #N/A       |            |
|                                    | SLC3A2                                                          | 0          | 0,00123749 | 0,45078682 | 0,00095539 |            |
|                                    | SLC7A1                                                          | 3          | 0,98075272 | -0,0079056 | 0,45656351 |            |
|                                    | SLC7A2                                                          | #N/A       | #N/A       | #N/A       | #N/A       |            |
|                                    | SLC7A3                                                          | #N/A       | #N/A       | #N/A       | #N/A       |            |
|                                    | SLC7A4                                                          | #N/A       | #N/A       | #N/A       | #N/A       |            |
|                                    | <b>cationic amino acid transporter/ glycoprotein-associated</b> | SLC7A5     | 0          | 0,4450682  | 0,16459868 | 0,01321125 |
|                                    |                                                                 | SLC7A6     | #N/A       | #N/A       | #N/A       | #N/A       |
|                                    |                                                                 | SLC7A7     | #N/A       | #N/A       | #N/A       | #N/A       |
| SLC7A8                             |                                                                 | #N/A       | #N/A       | #N/A       | #N/A       |            |
| SLC7A9                             |                                                                 | #N/A       | #N/A       | #N/A       | #N/A       |            |
| SLC7A10                            |                                                                 | #N/A       | #N/A       | #N/A       | #N/A       |            |
| SLC7A11                            |                                                                 | #N/A       | #N/A       | #N/A       | #N/A       |            |
| SLC7A12                            |                                                                 | #N/A       | #N/A       | #N/A       | #N/A       |            |
| SLC7A13                            |                                                                 | #N/A       | #N/A       | #N/A       | #N/A       |            |
| SLC7A14                            |                                                                 | #N/A       | #N/A       | #N/A       | #N/A       |            |
| <b>monocarboxylate transporter</b> | SLC16A1                                                         | 0          | 0,67955557 | 0,09538215 | 0,43199614 |            |
|                                    | SLC16A2                                                         | #N/A       | #N/A       | #N/A       | #N/A       |            |
|                                    | SLC16A3                                                         | #N/A       | #N/A       | #N/A       | #N/A       |            |
|                                    | SLC16A4                                                         | #N/A       | #N/A       | #N/A       | #N/A       |            |
|                                    | SLC16A5                                                         | #N/A       | #N/A       | #N/A       | #N/A       |            |
|                                    | SLC16A6                                                         | #N/A       | #N/A       | #N/A       | #N/A       |            |
|                                    | SLC16A7                                                         | #N/A       | #N/A       | #N/A       | #N/A       |            |
|                                    | SLC16A8                                                         | #N/A       | #N/A       | #N/A       | #N/A       |            |
|                                    | SLC16A9                                                         | #N/A       | #N/A       | #N/A       | #N/A       |            |
|                                    | SLC16A10                                                        | #N/A       | #N/A       | #N/A       | #N/A       |            |
|                                    | SLC16A11                                                        | #N/A       | #N/A       | #N/A       | #N/A       |            |
|                                    | SLC16A12                                                        | #N/A       | #N/A       | #N/A       | #N/A       |            |
|                                    | SLC16A13                                                        | #N/A       | #N/A       | #N/A       | #N/A       |            |
|                                    | SLC16A14                                                        | #N/A       | #N/A       | #N/A       | #N/A       |            |
| SLC25A1                            | 0                                                               | 0,90312319 | -0,0285229 | 0,6666473  |            |            |
| SLC25A2                            | #N/A                                                            | #N/A       | #N/A       | #N/A       |            |            |
| SLC25A3                            | 0                                                               | 0,6025524  | -0,0723901 | 0,94082708 |            |            |



|                                              |          |      |            |            |            |
|----------------------------------------------|----------|------|------------|------------|------------|
|                                              | SLC25A4  | 0    | 0,52409783 | -0,0784594 | 0,41636328 |
|                                              | SLC25A5  | 0    | 0,93018242 | -0,0116866 | 0,75461612 |
|                                              | SLC25A6  | 0    | 0,63253813 | -0,0594432 | 0,99461944 |
| <b>Transporter<br/>s</b>                     | SLC25A7  | #N/A | #N/A       | #N/A       | #N/A       |
|                                              | SLC25A8  | #N/A | #N/A       | #N/A       | #N/A       |
|                                              | SLC25A9  | #N/A | #N/A       | #N/A       | #N/A       |
|                                              | SLC25A10 | #N/A | #N/A       | #N/A       | #N/A       |
|                                              | SLC25A11 | 0    | 0,02502325 | -0,3122375 | 0,0029078  |
|                                              | SLC25A12 | 0    | 0,83169535 | 0,03264348 | 0,39877516 |
|                                              | SLC25A13 | 0    | 0,08490376 | 0,16942248 | 0,37703967 |
|                                              | SLC25A14 | #N/A | #N/A       | #N/A       | #N/A       |
|                                              | SLC25A15 | 1    | 0,99400599 | -0,0622023 | #N/A       |
|                                              | SLC25A16 | #N/A | #N/A       | #N/A       | #N/A       |
| <b>mitochondrial<br/>carrier</b>             | SLC25A17 | #N/A | #N/A       | #N/A       | #N/A       |
|                                              | SLC25A18 | #N/A | #N/A       | #N/A       | #N/A       |
|                                              | SLC25A19 | 0    | 0,43754362 | 0,19312338 | 0,78454128 |
|                                              | SLC25A20 | 0    | 0,05979596 | -0,6907471 | 0,76818078 |
|                                              | SLC25A21 | #N/A | #N/A       | #N/A       | #N/A       |
|                                              | SLC25A22 | 0    | 0,43609192 | -0,1158857 | 0,97725012 |
|                                              | SLC25A23 | #N/A | #N/A       | #N/A       | #N/A       |
|                                              | SLC25A24 | 1    | 0,21196784 | -0,1435038 | 0,01364338 |
|                                              | SLC25A25 | #N/A | #N/A       | #N/A       | #N/A       |
|                                              | SLC25A26 | #N/A | #N/A       | #N/A       | #N/A       |
| <b>fatty acid<br/>transport<br/>proteins</b> | SLC25A27 | #N/A | #N/A       | #N/A       | #N/A       |
|                                              | SLC25A28 | 0    | 0,73826174 | 0,12628324 | #N/A       |
|                                              | SLC25A29 | #N/A | #N/A       | #N/A       | #N/A       |
|                                              | SLC25A30 | #N/A | #N/A       | #N/A       | #N/A       |
|                                              | SLC25A31 | #N/A | #N/A       | #N/A       | #N/A       |
|                                              | SLC25A32 | #N/A | #N/A       | #N/A       | #N/A       |
|                                              | SLC25A33 | #N/A | #N/A       | #N/A       | #N/A       |
|                                              | SLC25A34 | #N/A | #N/A       | #N/A       | #N/A       |
|                                              | SLC25A35 | #N/A | #N/A       | #N/A       | #N/A       |
|                                              | SLC25A36 | #N/A | #N/A       | #N/A       | #N/A       |
|                                              | SLC25A37 | #N/A | #N/A       | #N/A       | #N/A       |
|                                              | SLC25A38 | #N/A | #N/A       | #N/A       | #N/A       |
|                                              | SLC25A39 | #N/A | #N/A       | #N/A       | #N/A       |
|                                              | SLC25A40 | #N/A | #N/A       | #N/A       | #N/A       |
|                                              | SLC25A41 | #N/A | #N/A       | #N/A       | #N/A       |
|                                              | SLC25A42 | #N/A | #N/A       | #N/A       | #N/A       |
|                                              | SLC25A43 | #N/A | #N/A       | #N/A       | #N/A       |
|                                              | SLC25A44 | #N/A | #N/A       | #N/A       | #N/A       |
|                                              | SLC27A1  | 0    | 0,15684316 | 0,3126836  | #N/A       |
|                                              | SLC27A2  | 0    | 0,00211867 | 0,30911264 | 0,54514943 |
|                                              | SLC27A3  | 0    | 0,01498502 | -0,5105327 | #N/A       |
|                                              | SLC27A4  | 0    | 0,26286949 | -0,1420268 | 0,8972126  |
|                                              | SLC27A5  | #N/A | #N/A       | #N/A       | #N/A       |
|                                              | SLC27A6  | #N/A | #N/A       | #N/A       | #N/A       |
|                                              | SLC38A1  | #N/A | #N/A       | #N/A       | #N/A       |

|                    |          |      |            |            |           |
|--------------------|----------|------|------------|------------|-----------|
|                    | SLC38A2  | 0    | 0,54777631 | 0,18639135 | 0,9890087 |
| <b>System A</b>    | SLC38A3  | #N/A | #N/A       | #N/A       | #N/A      |
| <b>&amp; N,</b>    | SLC38A4  | #N/A | #N/A       | #N/A       | #N/A      |
| <b>sodium-</b>     | SLC38A5  | 0    | 1          | 0,00251    | #N/A      |
| <b>coupled</b>     | SLC38A6  | #N/A | #N/A       | #N/A       | #N/A      |
| <b>neutral</b>     | SLC38A7  | #N/A | #N/A       | #N/A       | #N/A      |
| <b>amino acid</b>  | SLC38A8  | #N/A | #N/A       | #N/A       | #N/A      |
| <b>transporter</b> | SLC38A9  | 0    | 0,59340659 | -0,1632974 | #N/A      |
|                    | SLC38A10 | 0    | 0,93506494 | -0,1115494 | #N/A      |
|                    | SLC38A11 | #N/A | #N/A       | #N/A       | #N/A      |
| <b>Na+-</b>        | SLC43A1  | #N/A | #N/A       | #N/A       | #N/A      |
| <b>independen</b>  | SLC43A2  | #N/A | #N/A       | #N/A       | #N/A      |
| <b>t, system-L</b> | SLC43A3  | 0    | 0,33366633 | -0,234782  | #N/A      |
| <b>like amino</b>  | SLC43A4  | #N/A | #N/A       | #N/A       | #N/A      |
| <b>acid</b>        | SLC43A5  | #N/A | #N/A       | #N/A       | #N/A      |
| <b>transporter</b> | SLC43A6  | #N/A | #N/A       | #N/A       | #N/A      |

proteomics

! fc (miR-31/Ctrl)

#N/A #N/A means gene no found in proteomics data

#N/A

#N/A

-0,0135101

#N/A

#N/A

-0,6785517

-0,3400633

#N/A

-0,2572241

#N/A

#N/A

#N/A

#N/A

#N/A

0,08663235

#N/A

-0,1739145

#N/A

0,02184864

-0,0127429

-0,0549415

#N/A

0,21479234

#N/A

-0,1139471

-0,2312598

#N/A

-1,4943542

#N/A

#N/A

#N/A

#N/A

#N/A

#N/A

#N/A

0,20711851

-0,4205003

-0,1613162

0,13858315

0,57387528

-0,2462009

0,14755753

#N/A

0,05106851

0,23825995

-0,3565773  
#N/A  
-0,1254542  
-0,5531202  
-0,112507  
#N/A  
-0,2128918  
-0,0135101  
0,06741201  
-0,0020611  
#N/A  
#N/A  
#N/A  
0,08516016  
-0,2299828  
-0,2114173  
-0,0275453  
-0,0117616  
-0,2660218  
#N/A  
-0,3385026  
0,01120689  
#N/A  
-0,0200128  
-0,0589759  
#N/A  
0,06792554  
#N/A  
0,03176885  
0,34006753  
0,07683701  
-0,4032796  
#N/A  
#N/A  
#N/A  
#N/A  
#N/A  
#N/A  
0,00585018  
-0,0150915  
#N/A  
#N/A  
#N/A  
0,03826783  
-0,2796714  
#N/A  
-0,1454045  
-0,0752555

-0,1807097  
#N/A  
-0,6598965  
0,34695873  
#N/A  
0,00069079  
#N/A  
#N/A  
#N/A  
0,0586893  
-0,4160118  
0,02330918  
#N/A  
0,11078446  
#N/A  
#N/A  
-0,1298991  
#N/A  
#N/A  
#N/A  
-1,2493308  
-0,0005461  
#N/A  
-0,0984981  
-0,5788339  
-0,1028777  
0,03490651  
-0,1544287  
#N/A  
-0,1028473  
-0,061956  
-0,1728283  
0,09554559  
0,04580714  
0,00237995  
-0,0233502  
#N/A  
0,04087081  
0,06885187  
0,00506032  
-0,1272302  
-0,1663929  
#N/A  
#N/A  
0,06624855  
#N/A  
-0,7628412  
#N/A

#N/A  
-0,0689096  
0,05126348  
#N/A  
-0,4530744  
-0,2096204  
-0,1918515  
-0,271342  
-0,3164064  
0,14089973  
-0,4284458  
#N/A  
#N/A  
#N/A  
#N/A  
0,23427473  
-0,092084  
-1,0958714  
-0,4652738  
-0,0960703  
-0,1639743  
-0,274984  
#N/A  
-0,6706421  
-0,3892095  
0,19060319  
0,04105629  
0,08848237  
0,2238859  
#N/A  
0,0200969  
#N/A  
#N/A  
#N/A  
#N/A  
#N/A  
0,29986894  
#N/A



-0,0763719

0,03026735

0,00073448

#N/A

#N/A

#N/A

#N/A

-0,4488298

0,09842025

-0,0798075

#N/A

#N/A

#N/A

#N/A

#N/A

-0,0609008

-0,081211

#N/A

-0,0055352

#N/A

-0,2533977

#N/A

0,12627009

#N/A

-0,0188475

#N/A

#N/A

#N/A



0,00429428

#N/A

| SAMPLES        | Ctrl_1 | Ctrl_2 | Ctrl_3 | Ctrl_4 | Ctrl_5 | Ctrl_6 |
|----------------|--------|--------|--------|--------|--------|--------|
| Group          | Ctrl   | Ctrl   | Ctrl   | Ctrl   | Ctrl   | Ctrl   |
| GSSG           | 0,355  | 0,269  | 0,371  | 0,346  | 0,342  | 0,392  |
| GSH            | 5,769  | 7,449  | 6,763  | 8,4    | 9,108  | 7,071  |
| NAD            | 0,218  | 0,214  | 0,269  | 0,251  | 0,247  | 0,302  |
| NADH           | 0      | 0      | 0      | 0      | 0      | 0      |
| NADP           | 0,006  | 0,007  | 0,01   | 0,012  | 0,011  | 0,012  |
| NADPH          | 0,001  | 0,002  | 0,002  | 0,002  | 0,001  | 0,002  |
| FAD            | 0      | 0,001  | 0,001  | 0,001  | 0,001  | 0,002  |
| Glucose        | 0,948  | 0,982  | 1,399  | 1,305  | 1,413  | 1,314  |
| Glucose_6P     | 1,933  | 1,848  | 2,747  | 2,125  | 2,644  | 3,31   |
| Fructose_6P    | 2,088  | 2,037  | 3,012  | 2,474  | 3,088  | 3,436  |
| Fructose_1_6bP | 1,171  | 3,269  | 6,21   | 5,43   | 6,057  | 5,854  |
| Glyceraldehy   | 0,331  | 0,348  | 0,299  | 0,349  | 0,37   | 0,476  |
| Lactic_acid    | 0,022  | 0,033  | 0,025  | 0,04   | 0,038  | 0,026  |
| Ribulose_5P    | 0,209  | 0,226  | 0,328  | 0,277  | 0,354  | 0,354  |
| Ribose_5P      | 0,365  | 0,423  | 0,602  | 0,484  | 0,608  | 0,665  |
| Sedoheptulo    | 0,478  | 0,51   | 0,778  | 0,577  | 0,719  | 0,744  |
| Erythrose_4P   | 0,064  | 0,569  | 0,1    | 0,033  | 0,307  | 0,693  |
| Citric_acid    | 0,015  | 0,263  | 0,156  | 0,141  | 0,502  | 0,122  |
| alpha_Ketogl   | 0,005  | 0,005  | 0,005  | 0,006  | 0,007  | 0,005  |
| Fumaric_acid   | 0,062  | 0,077  | 0,037  | 0,096  | 0,094  | 0,069  |
| Malic_acid     | 0,42   | 0,501  | 0,232  | 0,593  | 0,569  | 0,223  |
| N_Acetylglut   | 0,025  | 0,028  | 0,027  | 0,031  | 0,036  | 0,028  |
| Myo—inositol   | 21,208 | 24,68  | 36,862 | 26,083 | 32,874 | 34,167 |
| Argininosucc   | 0,007  | 0,008  | 0,009  | 0,01   | 0,01   | 0,008  |
| Ribose         | 0,034  | 0      | 0,05   | 0,04   | 0,067  | 0,05   |
| Succinic_acid  | 0,007  | 0,007  | 0,005  | 0,008  | 0,01   | 0,004  |
| Uracil         | 0,004  | 0,002  | 0,002  | 0      | 0,002  | 0,004  |
| Thymine        | 0,004  | 0,005  | 0,005  | 0,006  | 0,006  | 0,005  |
| Thymidine      | 0,022  | 0,018  | 0,021  | 0,017  | 0,019  | 0,025  |
| Guanosine      | 0,004  | 0,005  | 0,005  | 0,006  | 0,005  | 0,005  |
| GMP            | 0,008  | 0,008  | 0,009  | 0,009  | 0,01   | 0,009  |
| CDP            | 0,002  | 0,003  | 0,004  | 0,003  | 0,004  | 0,004  |
| ADP            | 0,051  | 0,103  | 0,116  | 0,145  | 0,153  | 0,122  |
| ATP            | 0,179  | 0,408  | 0,896  | 0      | 0,644  | 0,957  |
| GDP            | 0,001  | 0,003  | 0,016  | 0,007  | 0,002  | 0,018  |
| UDP            | 0,014  | 0,017  | 0,009  | 0,029  | 0,029  | 0,01   |
| UMP            | 0,025  | 0,029  | 0,037  | 0,04   | 0,041  | 0,035  |
| TDP            | 0      | 0      | 0,002  | 0      | 0,002  | 0,002  |
| TTP            | 0,003  | 0      | 0,008  | 0,007  | 0      | 0,008  |
| UTP            | 0,046  | 0      | 0,193  | 0,189  | 0,146  | 0,226  |
| CTP            | 0,003  | 0,001  | 0,027  | 0,018  | 0,001  | 0,021  |
| GTP            | 0,002  | 0,007  | 0,01   | 0,011  | 0,009  | 0,008  |
| UDP_NAcGlc     | 2,02   | 1,885  | 3,246  | 2,873  | 2,834  | 3,13   |
| Deoxyribose_   | 0,003  | 0,004  | 0,004  | 0,005  | 0,005  | 0,004  |
| Creatine       | 0,011  | 0,008  | 0,008  | 0,008  | 0,008  | 0,008  |
| Arginine       | 0,002  | 0,029  | 0,017  | 0      | 0,041  | 0,025  |

|               |       |       |       |       |       |       |
|---------------|-------|-------|-------|-------|-------|-------|
| Asparagine    | 0,025 | 0,003 | 0,005 | 0,002 | 0,001 | 0,019 |
| Tyrosine      | 0,329 | 0,344 | 0,416 | 0,429 | 0,428 | 0,455 |
| Alanine       | 0,008 | 0,009 | 0,007 | 0,008 | 0,009 | 0,007 |
| Serine        | 0,005 | 0,004 | 0,004 | 0,003 | 0,003 | 0,004 |
| Cysteine      | 0,004 | 0,003 | 0,005 | 0,005 | 0,005 | 0,005 |
| Lysine        | 0,056 | 0,086 | 0,081 | 0,089 | 0,094 | 0,085 |
| Glutamic_ac   | 2,559 | 2,886 | 2,895 | 2,995 | 3,106 | 2,681 |
| Aspartic_acid | 0,024 | 0,044 | 0,037 | 0,027 | 0,043 | 0,028 |
| GABA          | 0,105 | 0,127 | 0,119 | 0,139 | 0,146 | 0,115 |
| Ornithine     | 0,002 | 0,002 | 0,001 | 0,002 | 0,002 | 0,002 |
| Threonine     | 0,02  | 0,003 | 0,007 | 0,005 | 0,004 | 0,01  |
| Methionine    | 0,017 | 0,02  | 0,021 | 0,023 | 0,021 | 0,023 |
| Valine        | 0,087 | 0,098 | 0,105 | 0,122 | 0,114 | 0,108 |
| Proline       | 0,17  | 0,199 | 0,201 | 0,217 | 0,214 | 0,202 |
| Cystine       | 0,043 | 0,116 | 0,069 | 0,146 | 0,089 | 0,044 |
| Phenylalanin  | 0,075 | 0,089 | 0,097 | 0,114 | 0,114 | 0,101 |
| Leucine       | 0,053 | 0,062 | 0,063 | 0,078 | 0,077 | 0,062 |
| Tryptophan    | 0,011 | 0,016 | 0,015 | 0,018 | 0,017 | 0,016 |
| Isoleucine    | 0,122 | 0,1   | 0,128 | 0,102 | 0,085 | 0,114 |
| Glutamine     | 2,76  | 2,805 | 3,076 | 3,199 | 2,931 | 2,915 |
| Taurine       | 0,352 | 0,434 | 0,434 | 0,476 | 0,479 | 0,438 |
| N—Acetylorn   | 0,002 | 0,003 | 0,002 | 0,003 | 0,002 | 0,002 |
| Acetoacetic_  | 0,002 | 0,003 | 0,002 | 0,003 | 0,003 | 0,003 |

| Ctrl_7 | Ctrl_8 | miR31_1 | miR31_2 | miR31_3 | miR31_4 | miR31_5 |
|--------|--------|---------|---------|---------|---------|---------|
| Ctrl   | Ctrl   | miR_31  | miR_31  | miR_31  | miR_31  | miR_31  |
| 0,339  | 0,351  | 0,411   | 0,377   | 0,709   | 0,73    | 0,571   |
| 8,952  | 8,838  | 6,787   | 7,727   | 6,877   | 8,025   | 8,016   |
| 0,252  | 0,257  | 0,255   | 0,234   | 0,374   | 0,37    | 0,306   |
| 0      | 0      | 0       | 0       | 0       | 0,001   | 0       |
| 0,013  | 0,013  | 0,003   | 0,004   | 0,006   | 0,007   | 0,008   |
| 0,002  | 0,002  | 0,002   | 0,002   | 0,002   | 0,002   | 0,002   |
| 0,002  | 0,002  | 0       | 0,001   | 0       | 0,002   | 0,002   |
| 1,31   | 1,3    | 1,998   | 1,929   | 1,734   | 1,728   | 1,837   |
| 2,397  | 2,847  | 1,853   | 1,595   | 1,839   | 1,705   | 1,731   |
| 2,894  | 3,034  | 1,172   | 1,119   | 1,234   | 1,271   | 1,331   |
| 7,199  | 6,904  | 0,684   | 0,793   | 2,088   | 1,522   | 1,362   |
| 0,468  | 0,355  | 1,488   | 0,879   | 1,559   | 1,457   | 1,213   |
| 0,041  | 0,046  | 0,033   | 0,028   | 0,04    | 0,035   | 0,04    |
| 0,324  | 0,342  | 0,147   | 0,138   | 0,151   | 0,158   | 0,156   |
| 0,576  | 0,585  | 0,266   | 0,275   | 0,274   | 0,283   | 0,309   |
| 0,634  | 0,664  | 0,405   | 0,369   | 0,503   | 0,492   | 0,45    |
| 1,184  | 1,257  | 0,987   | 3,695   | 0,462   | 0,419   | 0,723   |
| 0,411  | 0,388  | 0,032   | 0,212   | 0,448   | 0,26    | 0,423   |
| 0,006  | 0,006  | 0,005   | 0,005   | 0,006   | 0,01    | 0,008   |
| 0,09   | 0,088  | 0,041   | 0,166   | 0,038   | 0,07    | 0,094   |
| 0,552  | 0,545  | 0,121   | 1,02    | 0,124   | 0,554   | 0,399   |
| 0,033  | 0,033  | 0,035   | 0,036   | 0,04    | 0,053   | 0,049   |
| 29,218 | 30,089 | 24,433  | 19,096  | 24,05   | 21,356  | 23,748  |
| 0,01   | 0,01   | 0,011   | 0,01    | 0,012   | 0,015   | 0,012   |
| 0,057  | 0,055  | 0,018   | 0,051   | 0,053   | 0,059   | 0,05    |
| 0,006  | 0,006  | 0,007   | 0,01    | 0,006   | 0,013   | 0,01    |
| 0,015  | 0,002  | 0,002   | 0,001   | 0,002   | 0,005   | 0,007   |
| 0,005  | 0,006  | 0,005   | 0,005   | 0,006   | 0,008   | 0,006   |
| 0,03   | 0,019  | 0,033   | 0,023   | 0,031   | 0,034   | 0,038   |
| 0,006  | 0,005  | 0,006   | 0,005   | 0,007   | 0,008   | 0,006   |
| 0,01   | 0,009  | 0,007   | 0,007   | 0,009   | 0,01    | 0,009   |
| 0,005  | 0,005  | 0,001   | 0       | 0,004   | 0,002   | 0,002   |
| 0,169  | 0,183  | 0,019   | 0,016   | 0,044   | 0,039   | 0,061   |
| 1,045  | 0,909  | 0,14    | 0,054   | 0,42    | 0,168   | 0,313   |
| 0,011  | 0,003  | 0       | 0       | 0,013   | 0,001   | 0,001   |
| 0,032  | 0,03   | 0,008   | 0,008   | 0,014   | 0,014   | 0,016   |
| 0,039  | 0,037  | 0,032   | 0,034   | 0,04    | 0,043   | 0,041   |
| 0,001  | 0      | 0       | 0       | 0,001   | 0       | 0       |
| 0,01   | 0,007  | 0,002   | 0,001   | 0,004   | 0,004   | 0       |
| 0,248  | 0      | 0,036   | 0,017   | 0,122   | 0,06    | 0,086   |
| 0,028  | 0      | 0,005   | 0,001   | 0,012   | 0,002   | 0       |
| 0,015  | 0,012  | 0,001   | 0       | 0,01    | 0,003   | 0,007   |
| 2,503  | 3,068  | 1,879   | 1,874   | 2,996   | 2,828   | 3,058   |
| 0,005  | 0,004  | 0,004   | 0,004   | 0,005   | 0,007   | 0,006   |
| 0,009  | 0,011  | 0,007   | 0,01    | 0,008   | 0,009   | 0,007   |
| 0      | 0,038  | 0,011   | 0,042   | 0,027   | 0,011   | 0,025   |

|       |       |       |       |       |       |       |
|-------|-------|-------|-------|-------|-------|-------|
| 0,005 | 0,004 | 0,052 | 0,053 | 0,034 | 0,03  | 0,001 |
| 0,453 | 0,472 | 0,588 | 0,575 | 0,678 | 0,761 | 0,647 |
| 0,008 | 0,01  | 0,01  | 0,01  | 0,009 | 0,009 | 0,009 |
| 0,004 | 0,004 | 0,007 | 0,008 | 0,006 | 0,006 | 0,004 |
| 0,005 | 0,006 | 0,005 | 0,005 | 0,007 | 0,007 | 0,006 |
| 0,09  | 0,105 | 0,123 | 0,123 | 0,123 | 0,143 | 0,137 |
| 2,943 | 3,292 | 3,464 | 3,565 | 4,31  | 4,444 | 4,536 |
| 0,079 | 0,046 | 0,065 | 0,124 | 0,096 | 0,084 | 0,025 |
| 0,138 | 0,143 | 0,158 | 0,168 | 0,179 | 0,209 | 0,202 |
| 0,001 | 0,002 | 0,004 | 0,004 | 0,003 | 0,003 | 0,004 |
| 0,015 | 0,015 | 0,018 | 0,014 | 0,016 | 0,016 | 0,002 |
| 0,026 | 0,026 | 0,029 | 0,026 | 0,031 | 0,036 | 0,03  |
| 0,13  | 0,127 | 0,144 | 0,146 | 0,161 | 0,181 | 0,16  |
| 0,239 | 0,248 | 0,275 | 0,265 | 0,298 | 0,332 | 0,311 |
| 0,076 | 0,06  | 0,093 | 0,101 | 0,076 | 0,079 | 0,057 |
| 0,122 | 0,122 | 0,146 | 0,145 | 0,16  | 0,181 | 0,17  |
| 0,082 | 0,086 | 0,099 | 0,1   | 0,105 | 0,121 | 0,114 |
| 0,019 | 0,019 | 0,022 | 0,021 | 0,024 | 0,026 | 0,025 |
| 0,09  | 0,082 | 0,105 | 0,092 | 0,09  | 0,112 | 0,108 |
| 3,076 | 3,246 | 3,224 | 3,065 | 3,764 | 4,042 | 3,514 |
| 0,501 | 0,517 | 0,351 | 0,357 | 0,374 | 0,415 | 0,417 |
| 0,003 | 0,003 | 0,004 | 0,004 | 0,003 | 0,004 | 0,004 |
| 0,003 | 0,003 | 0,004 | 0,003 | 0,002 | 0,005 | 0,005 |

| miR31_6 | miR31_7 | miR31_8 |
|---------|---------|---------|
| miR_31  | miR_31  | miR_31  |
| 0,505   | 0,489   | 0,372   |
| 6,815   | 8,588   | 9,084   |
| 0,316   | 0,308   | 0,236   |
| 0       | 0       | 0       |
| 0,002   | 0,001   | 0,001   |
| 0,001   | 0,002   | 0,001   |
| 0,001   | 0,002   | 0,001   |
| 1,636   | 1,711   | 1,708   |
| 1,399   | 1,112   | 1,124   |
| 0,949   | 0,707   | 0,776   |
| 0,108   | 0,104   | 0,489   |
| 2,946   | 3,347   | 2,893   |
| 0,023   | 0,027   | 0,032   |
| 0,087   | 0,086   | 0,097   |
| 0,217   | 0,125   | 0,183   |
| 0,411   | 0,332   | 0,326   |
| 2,713   | 1,656   | 5,665   |
| 0,134   | 0,161   | 0,311   |
| 0,006   | 0,008   | 0,008   |
| 0,128   | 0,167   | 0,158   |
| 0,828   | 0,814   | 0,937   |
| 0,039   | 0,046   | 0,043   |
| 28,225  | 19,812  | 20,874  |
| 0,011   | 0,012   | 0,011   |
| 0,049   | 0,043   | 0,026   |
| 0,009   | 0,013   | 0       |
| 0,002   | 0,015   | 0,01    |
| 0,004   | 0,006   | 0,006   |
| 0,023   | 0,034   | 0,035   |
| 0,005   | 0,005   | 0,001   |
| 0,005   | 0,005   | 0,006   |
| 0       | 0       | 0       |
| 0,053   | 0,003   | 0,015   |
| 0,031   | 0,07    | 0,075   |
| 0       | 0       | 0       |
| 0,005   | 0,006   | 0,009   |
| 0,035   | 0,039   | 0,039   |
| 0       | 0       | 0       |
| 0       | 0       | 0       |
| 0,008   | 0,015   | 0,021   |
| 0       | 0,001   | 0       |
| 0       | 0,001   | 0       |
| 3,014   | 2,553   | 2,135   |
| 0,003   | 0,005   | 0,005   |
| 0,004   | 0,01    | 0,008   |
| 0,024   | 0,008   | 0,046   |

|       |       |       |
|-------|-------|-------|
| 0,048 | 0,067 | 0,063 |
| 0,608 | 0,649 | 0,578 |
| 0,007 | 0,009 | 0,009 |
| 0,005 | 0,006 | 0,007 |
| 0,006 | 0,006 | 0,006 |
| 0,103 | 0,12  | 0,131 |
| 3,875 | 4,525 | 3,896 |
| 0,105 | 0,139 | 0,013 |
| 0,15  | 0,201 | 0,196 |
| 0,004 | 0,005 | 0,005 |
| 0,004 | 0,012 | 0,007 |
| 0,018 | 0,023 | 0,012 |
| 0,121 | 0,154 | 0,146 |
| 0,241 | 0,297 | 0,287 |
| 0,054 | 0,092 | 0,059 |
| 0,136 | 0,158 | 0,156 |
| 0,082 | 0,101 | 0,107 |
| 0,021 | 0,024 | 0,024 |
| 0,069 | 0,078 | 0,076 |
| 3,146 | 3,789 | 2,946 |
| 0,362 | 0,432 | 0,417 |
| 0,003 | 0,004 | 0,004 |
| 0,003 | 0,003 | 0,004 |

| Sample Group | CTR_1<br>CTRL | CTR_2<br>CTRL | CTR_3<br>CTRL | CTR_4<br>CTRL | MiR31_1<br>MiR31 | MiR31_2<br>MiR31 |
|--------------|---------------|---------------|---------------|---------------|------------------|------------------|
| IL_1a        | 3             | 24,79         | 3,38          | 24,12         | 40,16            | 48,11            |
| IL_1b        | 2             | 4,59          | 2             | 2,71          | 5,45             | 6,65             |
| IL_6         | 1             | 1             | 1             | 1,18          | 11,5             | 13,78            |
| IL_15        | 9,76          | 10,32         | 5,6           | 12,1          | 13,21            | 12,35            |
| IL_17        | 10,11         | 26            | 8,47          | 20,1          | 26,21            | 26,14            |
| IL_21        | 6             | 6             | 6             | 6             | 36,3             | 89,38            |
| TGFβ_1       | 404,7         | 354,58        | 263,3         | 376,9         | 606,15           | 536,27           |
| CCL13        | 11,86         | 5,43          | 5             | 23,48         | 29,13            | 32,01            |
| CCL22        | 25,35         | 19,45         | 8             | 20,63         | 20,55            | 20,19            |
| GM-CSF       | 10            | 15,15         | 10            | 18,63         | 28,15            | 25,99            |
| sICAM        | 732,39        | 435,38        | 253           | 632,67        | 762,21           | 635,11           |
| sCD163       | 190           | 450,79        | 190           | 734,08        | 718,31           | 823,56           |
| CCL2         | 532,72        | 500,27        | 500,43        | 493,72        | 949,93           | 677,83           |
| IL_8         | 299,58        | 259,38        | 293,06        | 271,95        | 490,16           | 398,95           |
| VEGF         | 967,65        | 847,78        | 861,78        | 820,09        | 1412,28          | 1383,05          |
| S100A8       | 6920,26       | 5466,24       | 5355,07       | 5187,29       | 4268,85          | 4444,38          |



| MiR31_3<br>MiR31 | MiR31_4<br>MiR31 | MiR31_CB83<br>MiR31+CB83 | MiR31_CB83<br>MiR31+CB83 | MiR31_CB83<br>MiR31+CB83 | MiR31_CB839_4<br>MiR31+CB839 |
|------------------|------------------|--------------------------|--------------------------|--------------------------|------------------------------|
| 41,79            | 37,78            | 26,22                    | 29,38                    | 29,34                    | 26,58                        |
| 6,23             | 5,69             | 4,47                     | 4,04                     | 4,25                     | 4,53                         |
| 11,89            | 7,1              | 16,4                     | 10,06                    | 18,36                    | 13,82                        |
| 12,14            | 11,78            | 10,83                    | 8,39                     | 10,02                    | 8,89                         |
| 24,06            | 20,67            | 20,82                    | 14,06                    | 26,69                    | 14,88                        |
| 42,33            | 5,96             | 91,07                    |                          | 211,07                   | 75,63                        |
| 442,77           | 420,99           | 350,73                   | 271,98                   | 408,15                   | 288,24                       |
| 30,67            | 24,71            | 24,41                    | 13,54                    | 27,49                    | 16,05                        |
| 17,72            | 20,34            | 16,71                    | 9,36                     | 11,24                    | 8,28                         |
| 20,03            | 21,73            | 16,41                    | 12,62                    | 18,29                    | 10,6                         |
| 722,59           | 693,67           | 362,75                   | 253,34                   | 358,9                    | 410,02                       |
| 694,53           | 548,27           | 463,72                   | 339,81                   | 442,12                   | 190,5                        |
| 632,47           | 706,98           | 518,88                   | 487,27                   | 524,39                   | 512,35                       |
| 368,05           | 409,79           | 468,36                   | 469,68                   | 526,25                   | 513,22                       |
| 1216,55          | 1550,75          | 1393,86                  | 1493,45                  | 1609,5                   | 1477,45                      |
| 5243,36          | 6068,5           | 7388,46                  | 5131,08                  | 8404,95                  | 7645,54                      |

| Sample Group   | CTR_1<br>CTRL | CTR_2<br>CTRL | CTR_3<br>CTRL | CTR_4<br>CTRL | TNF- $\alpha$ _1<br>TNF- $\alpha$ | TNF- $\alpha$ _2<br>TNF- $\alpha$ |
|----------------|---------------|---------------|---------------|---------------|-----------------------------------|-----------------------------------|
| IL_1a          | 3,38          | 24,79         | 3,38          | 24,12         | 48,96                             | 44,79                             |
| IL_1b          | 2,70          | 4,59          | 2,70          | 2,71          | 9,62                              | 6,77                              |
| IL_6           | 1,00          | 1,00          | 1,00          | 1,18          | 177,09                            | 235,53                            |
| IL_15          | 9,76          | 10,32         | 5,60          | 12,10         | 17,67                             | 21,90                             |
| IL_17          | 10,11         | 26,00         | 8,47          | 20,10         | 45,66                             | 37,36                             |
| IL_21          | 6,00          | 6,00          | 6,00          | 6,00          | 260,62                            | 300,41                            |
| TGF $\beta$ _1 | 404,70        | 354,58        | 263,30        | 376,90        | 527,21                            | 596,66                            |
| MIP_1b         | 1,33          | 9,99          | 3,90          | 12,05         | 13,62                             | 15,13                             |
| CCL13          | 11,86         | 5,43          | 5,00          | 23,48         | 33,49                             | 29,62                             |
| CCL22          | 25,35         | 19,45         | 19,00         | 20,63         | 146,46                            | 215,30                            |
| IP_10          | 0,00          | 0,00          | 0,00          | 0,00          | 301,57                            | 424,43                            |
| GM_CSF         | 11,00         | 15,15         | 11,00         | 18,63         | 39,67                             | 45,08                             |
| sICAM          | 732,39        | 435,38        | 435,00        | 632,67        | 2107,86                           | 2105,99                           |
| sCD163         | 450,00        | 450,79        | 450,00        | 734,08        | 1085,80                           | 1056,48                           |
| IL_8           | 299,58        | 259,38        | 293,06        | 271,95        | 6412,30                           | 7763,62                           |
| VEGF           | 967,65        | 847,78        | 861,78        | 820,09        | 2176,97                           | 2321,03                           |
| S100A8         | 6920,26       | 5466,24       | 5355,07       | 5187,29       | 9099,30                           | 8704,13                           |

| TNF- $\alpha$ _3 | TNF- $\alpha$ _4 | TNF- $\alpha$ _CB83 | TNF- $\alpha$ _CB83 | TNF- $\alpha$ _CB83 | TNF- $\alpha$ _CB839_4 |
|------------------|------------------|---------------------|---------------------|---------------------|------------------------|
| TNF- $\alpha$    | TNF- $\alpha$    | TNF- $\alpha$ +CB83 | TNF- $\alpha$ +CB83 | TNF- $\alpha$ +CB83 | TNF- $\alpha$ +CB839   |
| 45,05            | 19,07            | 38,35               | 44,79               | 38,95               | 31,81                  |
| 9,45             | 2,70             | 4,19                | 2,70                | 6,17                | 5,39                   |
| 198,38           | 149,90           | 211,41              | 232,71              | 230,61              | 204,87                 |
| 17,07            | 12,75            | 12,99               | 13,81               | 16,59               | 18,77                  |
| 39,73            | 23,22            | 32,69               | 32,55               | 31,47               | 37,22                  |
| 257,92           | NA               | 23,49               | 158,90              | 178,11              | 75,63                  |
| 487,71           | 455,77           | 387,68              | 384,51              | 521,17              | 439,67                 |
| 12,77            | 6,86             | 16,34               | 10,28               | 12,15               | 11,61                  |
| 36,32            | 19,99            | 27,23               | 16,55               | 36,23               | 31,57                  |
| 118,07           | 138,08           | 103,65              | 197,16              | 168,59              | 192,19                 |
| 319,51           | 296,86           | 421,06              | 617,80              | 553,67              | 570,05                 |
| 33,45            | 11,80            | 20,05               | 21,75               | 24,14               | 21,63                  |
| 1628,85          | 1623,70          | 2051,20             | 1731,99             | 2104,12             | 2071,17                |
| 812,00           | 330,64           | 690,56              | 610,02              | 678,60              | 741,94                 |
| 6024,85          | 7050,43          | 3954,45             | 5409,96             | 4538,78             | 5072,56                |
| 1953,37          | 2173,86          | 2142,93             | 2573,08             | 2544,00             | 2599,08                |
| 8103,22          | 9490,44          | 6656,89             | 9050,13             | 9393,02             | 9636,13                |

| <b>No.</b> | <b>Gene Name</b> | <b>Sequence (5' → 3')</b> |
|------------|------------------|---------------------------|
| 1          | HK1-F            | GCTCTCCGATGAAACTCTCATAG   |
| 2          | HK1-R            | GGACCTTACGAATGTTGGCAA     |
| 3          | HK2-F            | GAGCCACCACTCACCCCTACT     |
| 4          | HK2-R            | CCAGGCATTCGGCAATGTG       |
| 5          | GPI-F            | CAAGGACCGCTTCAACCACTT     |
| 6          | GPI-R            | CCAGGATGGGTGTGTTTGACC     |
| 7          | PFKL-F           | GCTGGGCGGCACTATCATT       |
| 8          | PFKL-R           | TCAGGTGCGAGTAGGTCCG       |
| 9          | PFKM-F           | GGTGCCCGTGTCTTCTTTGT      |
| 10         | PFKM-R           | AAGCATCATCGAAACGCTCTC     |
| 11         | PFKP-F           | GCATGGGTATCTACGTGGGG      |
| 12         | PFKP-R           | CTCTGCGATGTTTGAGCCTC      |
| 13         | SLC3A2-F         | TGAATGAGTTAGAGCCCGAGA     |
| 14         | SLC3A2-R         | GTCTTCCGCCACCTTGATCTT     |
| 15         | SLC7A11-F        | TCTCAAAGGAGGTTACCTGC      |
| 16         | SLC7A11-R        | AGACTCCCCTCAGTAAAGTGAC    |
| 17         | β-Actin-F        | CGTCACCAACTGGGACGACA      |
| 18         | β-Actin-R        | CTTCTCGCGTTGGCCTTGG       |

**Primer bank ID or other reference**

188497751c1

40806188c1

296080692c1

50346003c1

266453618c1

334191700c1

312032447c1

80861465c1

Immunity,2015,Apr,42,4,756-66

| <b>No.</b> | <b>Antibody</b>       | <b>Species</b> | <b>Dilution</b> | <b>Company</b> | <b>Cat No.</b> |
|------------|-----------------------|----------------|-----------------|----------------|----------------|
| 1          | GLUT1                 | Rabbit         | 1:200           | Abcam          | ab652          |
| 2          | GLS                   | Rabbit         | 1:200           | Abcam          | ab93434        |
| 3          | GLUL(GS)              | Rabbit         | 1:200           | CST            | 27857S         |
| 4          | Ki67                  | Rabbit         | 1:200           | Abcam          | Ab15580        |
| 5          | CD4                   | Rabbit         | 1:600           | Abcam          | ab183685       |
| 6          | Myeloperoxidase (MPO) | Rabbit         | 1:600           | Abcam          | ab208670       |
